# Supplementary material for: Deterministic and Stochastic Allele Specific Gene Expression in Single Mouse Blastomeres
Source: PLoS One. 2011 Jun 23;6(6):e21208. doi: 10.1371/journal.pone.0021208 (PMC3121735; doi:10.1371/journal.pone.0021208)
Supplement: Table S6 — The expression of 380 genes in blastomeres of 2-cell and 4-cell embryos by single cell TaqMan real-time PCR. (XLS) [file pone.0021208.s006.xls]

## Sheet: Table_S6_raw Ct values
Well	ACCESSION	Probe_ID	Assay ID	GENE	2-cell-A1-1 (Ct)	2-cell-A1-2 (Ct)	2-cell-A2-1 (Ct)	2-cell-A2-2 (Ct)	2-cell-B1-1 (Ct)	2-cell-B1-2 (Ct)	2-cell-B2-1 (Ct)	2-cell-B2-2 (Ct)	2-cell-C1-1 (Ct)	2-cell-C1-2 (Ct)	2-cell-C2-1 (Ct)	2-cell-C2-2 (Ct)	4-cell-A1-1 (Ct)	4-cell-A1-2 (Ct)	4-cell-A2-1 (Ct)	4-cell-A2-2 (Ct)	4-cell-A3-1 (Ct)	4-cell-A3-2 (Ct)	4-cell-A4-1 (Ct)	4-cell-A4-2 (Ct)	4-cell-B1-1 (Ct)	4-cell-B1-2 (Ct)	4-cell-B2-1 (Ct)	4-cell-B2-2 (Ct)	4-cell-B3-1 (Ct)	4-cell-B3-2 (Ct)	4-cell-B4-1 (Ct)	4-cell-B4-2 (Ct)	4-cell-C1-1 (Ct)	4-cell-C1-2 (Ct)	4-cell-C2-1 (Ct)	4-cell-C2-2 (Ct)	4-cell-C3-1 (Ct)	4-cell-C3-2 (Ct)	4-cell-C4-1 (Ct)	4-cell-C4-2 (Ct)
1	NM_007382.3	548094	Mm00431611_m1	Acadm	35.3712	34.6716	29.1782	29.3662	34.2919	36.8603	29.4074	29.2832	30.3466	30.4857	30.6878	30.4966	29.299	29.1413	29.8531	29.7546	28.8801	29.2337	27.1052	27.2638	33.3663	32.7619	26.4679	26.5545	29.9028	29.3631	27.4954	27.1683	26.3186	25.8358	26.8472	26.9985	26.2325	26.3498	29.2048	29.2308
2	NM_009881.2	455218	Mm00515473_g1	Cdyl	30.0578	30.0674	32.1539	32.533	31.1121	31.2389	31.4592	31.5058	29.9257	29.8906	31.246	31.6164	32.7239	32.5526	29.888	30.2061	28.8286	28.7192	28.9265	28.9734	33.9164	34.4554	29.0254	29.123	30.8523	31.0224	28.3526	28.3005	34.355	34.1558	30.6762	30.8669	30.4208	30.3003	40	40
3	NM_007397.2	598054	Mm00431667_g1	Acvr2b	28.0394	28.1124	28.9717	28.9247	27.5354	27.5317	28.3967	28.4961	27.3591	27.1246	28.3316	28.242	28.1488	27.9703	27.053	27.1332	27.2079	27.1115	34.6789	34.2138	40	37.7152	30.5533	30.6935	36.5963	38.3832	36.0236	35.1646	28.0439	28.0199	40	40	29.7495	29.674	28.4324	28.2256
4	NM_010411.2	909225	Mm00515916_m1	Hdac3	30.5731	31.403	29.673	29.7445	33.5072	33.818	29.2975	29.3648	31.6907	32.3368	30.6174	30.756	40	38.0071	29.8965	29.876	40	40	40	40	40	40	31.5846	31.6432	40	40	31.6601	31.5981	40	40	28.1173	28.1881	29.8187	29.6244	40	40
5	NM_007554.2	530589	Mm00432087_m1	Bmp4	35.7495	37.3356	40	40	30.788	30.7508	40	38.2877	40	40	40	40	40	40	37.9057	40	40	40	40	40	40	40	40	40	40	40	40	40	38.5231	37.8327	40	40	40	40	40	40
6	NM_010412.3	922035	Mm00515941_g1	Hdac5	30.776	30.8859	34.6307	34.8418	29.6894	29.6544	35.0414	40	38.0972	38.5765	29.0414	29.1562	30.6141	32.2883	26.6364	26.703	27.3457	27.4123	32.1431	31.8636	28.0489	28.0772	27.2337	27.2119	40	36.75	28.1422	28.1142	26.9837	26.874	29.1684	28.9325	27.3432	27.2245	27.2914	27.3172
7	NM_007891.3	657755	Mm00432941_g1	E2f1	25.9127	25.9384	26.3234	26.2313	25.8308	25.688	26.0968	25.9498	25.4293	25.6046	26.3141	26.3983	26.2001	26.2761	26.3489	26.2662	27.886	27.7287	27.2627	27.3081	25.7027	25.8488	27.285	27.3022	28.9949	29.1277	26.1554	26.2809	26.7959	26.7372	25.4532	25.4373	25.7871	25.811	25.7743	25.7679
8	NM_010635.1	809094	Mm00516096_m1	Klf1	40	40	40	40	40	40	40	40	40	40	40	40	40	40	40	40	40	40	40	40	40	40	40	40	40	40	40	40	40	40	40	40	40	40	40	40
9	NM_008007.1	482155	Mm00433290_m1	Fgf3	40	40	40	40	40	40	40	40	40	40	40	40	26.6199	26.774	28.5261	28.258	40	38.4339	30.9311	30.8007	33.3813	32.863	28.2144	28.4775	40	40	40	40	40	40	40	40	40	40	27.8692	27.9849
10	NM_010637.2	440920	Mm00516105_g1	Klf4	27.0956	27.2216	29.9279	30.1499	26.4124	26.3296	29.3879	29.018	25.7324	25.6258	25.9323	25.9553	29.5865	29.3397	27.9676	27.8356	27.4504	27.3909	28.4127	28.462	29.2665	29.1724	26.9002	26.8405	30.5817	30.5977	28.1773	28.2254	27.7793	27.9223	30.7505	30.8062	27.7806	27.8362	29.1232	29.2307
11	NM_008058.1	560057	Mm00433419_s1	Fzd8	40	40	40	40	40	40	40	40	40	40	40	40	40	40	40	40	40	40	40	40	40	40	40	40	40	40	40	40	40	40	40	40	40	40	40	40
12	NM_021459.3	333751	Mm00517585_m1	Isl1	40	40	32.0794	32.1712	40	40	40	40	40	35.5768	40	40	40	40	40	40	29.5058	29.435	30.4135	30.4581	39.0513	39.11	40	40	40	40	40	40	40	40	40	40	40	40	40	40
13	NM_008213.2	323860	Mm00433931_m1	Hand1	40	40	40	40	40	40	40	40	40	40	40	40	29.7969	30.8167	28.9472	29.0139	40	40	40	40	26.4833	26.3511	27.3562	27.4938	28.2835	28.4891	26.8194	26.798	28.2037	28.452	26.8443	26.9247	27.5819	27.6381	27.297	27.2806
14	NM_029550.3	889528	Mm00518630_m1	Keg1	40	40	40	40	40	40	40	40	40	40	40	40	40	40	40	40	40	40	40	40	40	40	40	40	40	40	40	40	40	40	40	40	40	40	40	40
15	NM_008656.4	641321	Mm00435125_m1	Myf5	40	40	40	40	40	40	40	40	40	40	40	40	40	40	40	40	40	40	40	40	40	40	40	40	40	40	40	40	40	40	40	40	40	40	40	40
16	NM_008498.2	525002	Mm00521776_m1	Lhx1	40	40	32.2325	32.902	40	40	31.7687	31.8827	35.8366	37.3252	35.4446	34.9916	33.2538	33.866	36.6171	36.2706	40	40	38.3017	38.2937	40	40	40	40	40	40	40	40	40	40	40	40	40	40	40	40
17	NM_008781.3	325761	Mm00435493_m1	Pax3	31.3037	31.1511	33.5212	34.206	30.1471	29.9775	31.2831	31.2398	40	40	40	40	40	40	40	40	40	40	36.235	36.0039	40	40	32.3675	32.51	40	40	40	40	30.3746	30.5962	40	40	33.6476	34.4862	31.1037	30.7656
18	NM_010773.1	477323	Mm00521970_m1	Mbd2	32.6918	32.5588	33.0248	32.887	31.0868	30.9622	30.8067	30.6887	32.9001	33.249	30.8216	30.7081	40	40	40	40	32.7227	32.5922	32.488	32.6227	40	40	40	40	40	40	40	40	33.9905	33.7566	39.7978	40	40	40	40	40
19	NM_008782.2	818523	Mm00435502_m1	Pax5	40	40	40	40	40	40	40	40	40	40	40	40	40	40	40	40	40	40	40	40	40	40	40	40	40	40	40	40	40	40	40	40	40	40	40	40
20	NM_030705.4	630457	Mm00522539_s1	Mesdc1	40	40	40	40	40	40	40	40	32.5372	32.6866	38.0303	37.528	40	40	40	40	40	40	30.884	31.187	40	40	34.9251	35.0514	40	40	40	40	40	40	40	40	40	40	40	40
21	NM_008839.1	686810	Mm00435673_m1	Pik3ca	26.9263	26.7521	26.4647	26.3907	27.7862	27.6129	26.9577	26.7025	27.5675	27.5889	27.3191	27.2739	30.7459	30.7729	32.9444	33.0983	29.5052	29.6117	30.4957	30.664	27.9293	28.2475	37.6104	40	40	40	28.7583	28.88	29.4314	29.1992	28.4506	28.737	28.4066	28.3184	29.9439	29.9901
22	NM_133982.1	738217	Mm00547640_s1	Rpp25	29.1129	29.3002	28.8079	28.8162	28.4113	28.4218	30.3943	30.4049	27.7274	27.6092	27.1016	27.0172	28.3448	28.3098	28.0562	28.0544	27.916	27.919	27.5629	27.5443	30.2656	29.9711	28.9512	28.9994	30.9386	30.8945	29.781	29.8064	28.4492	28.4694	27.5853	27.5328	28.8103	28.7969	28.4525	28.3087
23	NM_008957.2	535611	Mm00436031_m1	Ptch1	40	40	40	40	40	40	40	40	40	40	40	40	40	40	40	40	40	40	40	40	40	40	40	40	40	40	40	40	40	40	40	40	40	40	40	40
24	NM_007393.3	608492	Mm00607939_s1	Actb	31.4103	31.2807	28.2969	28.3849	28.1674	28.1672	29.9945	29.9934	29.5146	29.5576	28.7185	28.8145	27.5737	27.2838	28.025	28.2024	29.5859	29.5103	30.9312	30.7836	28.613	28.5742	27.1667	27.158	30.0995	29.8807	28.8332	29.0841	28.3001	28.2311	29.0118	28.9825	28.4767	28.6853	31.1206	30.9413
25	NM_026799.2	714586	Mm01310009_m1	Rnasen	27.3082	27.4484	26.6951	27.0116	27.3207	26.954	27.8336	27.2478	26.9607	26.7616	26.6533	26.7319	27.2915	27.3011	27.405	27.3765	27.8614	28.0974	27.4725	27.5077	29.9552	30.0641	28.5606	28.5495	29.614	29.4207	29.0263	28.9167	28.5017	28.6529	27.5411	27.4306	27.3479	27.4217	27.8195	27.7452
26	NM_011570.3	927090	Mm03053485_s1	Tes	31.3793	31.4259	33.5188	33.0321	31.569	31.698	31.6167	30.8243	31.5699	31.3244	32.6211	33.0691	40	40	40	40	31.4881	31.1727	32.6972	32.4779	40	40	40	40	40	40	40	40	40	40	32.5989	32.8011	34.2094	33.8597	40	40
27	NM_026890.1	668688	Mm01317472_m1	Ngdn	25.5282	25.6	25.9583	25.9976	25.1491	25.0881	25.8444	25.6979	25.4614	25.4342	25.049	25.0581	25.1916	24.9419	25.727	25.6811	25.6282	25.5836	25.1067	25.038	26.2662	26.3992	25.4654	25.3648	26.9598	26.9884	25.7049	25.8271	25.1218	25.0881	24.4373	24.4463	24.7693	24.8511	25.2938	25.3222
28	NM_011486.4	489532	Mm03053490_s1	Stat3	28.7675	28.5787	28.378	28.3175	28.3749	28.3356	28.7044	28.3806	29.8568	29.532	29.7852	29.64	36.4438	36.677	40	40	40	40	31.3731	30.7816	35.5537	35.9905	32.8096	32.5602	32.5453	31.9618	29.836	29.5585	31.7161	31.2674	31.318	30.9013	30.5856	30.7635	35.0088	34.6234
29	NM_009309.2	661161	Mm01318252_m1	T	40	40	40	40	40	40	40	40	40	40	40	40	40	40	40	40	40	40	40	40	40	40	40	40	40	40	40	40	40	40	40	40	40	40	40	40
30	NM_001003960.2	914927	Mm03053495_s1	Dnmt3b	28.7364	28.5998	29.2321	29.4156	27.8816	28.093	28.4144	28.1911	27.4396	27.2531	27.5807	27.5357	30.2683	29.8844	29.8058	29.6873	29.5656	29.8693	32.5587	31.8016	32.9073	33.6238	40	40	32.1772	31.4203	40	40	33.1401	32.7508	28.8143	28.5423	29.819	29.6549	28.8304	28.7981
31	NM_010881.1	445994	Mm01318933_m1	Ncoa1	27.9853	27.9599	27.2891	27.4862	27.588	27.395	28.2959	27.9901	28.7512	28.9302	28.1117	28.1609	40	40	28.9998	29.0831	30.7655	30.601	28.815	28.9409	30.8825	30.924	40	40	40	40	29.9667	29.9333	28.9627	28.9549	35.2968	35.7256	28.0529	27.9887	32.1565	31.8857
32	NM_001024918.1	307169	Mm03053508_s1	Rfx4	40	40	40	40	40	40	40	40	40	40	32.7381	32.9133	40	40	40	40	40	40	40	40	37.5086	37.312	40	40	40	40	40	40	40	40	40	40	40	40	40	40
33	NM_133676.2	624783	Mm01319559_g1	Osgep	32.1697	32.3453	33.1106	33.0452	40	40	31.8402	31.1646	40	40	40	40	26.5887	26.3739	25.4868	25.4107	27.3819	27.5141	28.4705	28.2232	27.7827	27.8005	26.3812	26.4004	29.365	29.1178	25.5015	25.5583	27.8979	27.9851	26.7239	26.6071	26.3279	26.334	27.9438	27.8538
34	NM_001029837.1	734954	Mm03053514_s1	Pik3cd	24.6923	24.75	25.0676	25.0362	24.2677	24.2367	25.4106	25.0138	24.5085	24.3557	25.1984	25.115	26.4689	26.2403	27.525	27.4782	26.9957	26.925	27.7505	27.803	29.1226	28.8983	27.3762	27.1523	29.7854	29.9342	29.5014	29.2665	26.8058	26.6471	27.9443	27.9008	27.5215	27.382	28.2357	28.208
35	NM_021457.2	435251	Mm01320682_s1	Fzd1	40	40	40	40	40	40	40	40	40	40	40	40	40	40	40	40	40	40	40	40	40	40	40	40	40	40	40	40	40	40	40	40	40	40	40	40
36	NM_001033369.2	383400	Mm03053519_s1	Acvr1c	40	40	40	40	40	40	40	40	40	40	40	40	40	40	40	40	40	40	40	40	40	40	40	40	40	40	40	40	40	40	40	40	40	40	40	40
37	NM_012019.2	314586	Mm01321788_m1	Aifm1	28.93	28.7391	28.7866	28.768	29.3032	28.9507	27.5358	27.2354	28.1374	28.3649	28.0887	28.1577	26.6302	26.4765	25.9898	25.9455	26.5763	26.7748	26.5486	26.4565	27.0696	27.0058	25.9992	26.0174	28.9672	28.8504	25.9415	26.0037	26.7444	26.7428	25.4835	25.4558	25.8408	25.9332	25.4425	25.4233
38	NM_001081125.1	755775	Mm03053524_s1	Gli2	40	40	40	40	40	40	40	40	40	40	40	40	40	40	40	40	40	40	40	40	40	40	40	40	40	40	40	40	40	40	40	40	40	40	40	40
39	NM_010588.2	851162	Mm01325629_m1	Jag2	31.0247	31.0749	30.2659	30.1089	31.5113	31.4585	31.5776	31.4236	28.9797	29.0975	32.0138	32.2411	40	40	40	40	34.4952	34.2441	30.5221	30.3895	40	40	30.2683	30.1067	32.0784	32.2227	32.224	32.3779	29.7307	29.6528	40	40	29.9384	29.7725	40	40
40	NM_001081149.1	603787	Mm03053529_s1	Myst3	40	38.9745	31.6811	31.2793	35.4877	36.6101	32.6903	32.1598	30.0843	30.0302	30.4387	30.6393	30.9916	30.5601	40	40	30.4468	30.4824	30.8207	30.8862	31.1305	30.9681	29.2136	29.1202	32.5408	31.9375	32.9291	32.9767	40	40	30.9788	30.7967	29.0332	28.7535	32.5811	32.4734
41	NM_009337.2	685043	Mm01332749_g1	Tcl1	22.2088	22.2346	22.3011	22.3679	22.0087	21.9465	22.1304	21.9557	22.7067	22.7	22.3491	22.3957	31.1267	30.7876	28.0304	27.9956	28.7077	28.5781	29.2882	29.5526	27.9683	28.0851	35.6638	34.6352	40	40	40	40	26.5367	26.4608	26.8743	26.8475	26.4187	26.4963	26.9519	27.0533
42	NM_001081445.1	772307	Mm03053534_s1	Ncam1	40	40	40	40	40	40	40	40	40	40	40	40	40	40	40	40	40	40	40	40	40	40	40	40	39.2858	40	40	40	40	40	40	40	40	40	40	40
43	NM_007556.2	657985	Mm01332882_m1	Bmp6	29.3735	29.2125	29.1249	28.941	27.7705	27.7666	29.6322	29.5351	31.6675	32.0455	32.7793	32.9756	30.7166	30.8182	31.3529	31.4696	31.5137	31.292	40	40	40	40	40	40	40	40	31.8036	31.9676	35.0615	34.6379	40	40	30.5563	30.4888	31.2515	31.0308
44	NM_007857.3	507232	Mm03053542_s1	Dhh	40	40	40	40	40	40	40	40	40	40	40	40	40	40	31.4954	31.2948	40	40	40	40	40	40	40	40	40	40	40	40	40	40	40	40	40	40	40	40
45	NM_010710.3	481098	Mm01336678_s1	Lhx2	32.1006	33.0097	30.5136	30.3546	30.7787	30.6709	28.9399	28.9945	29.8387	29.7654	30.3396	30.3692	40	40	40	40	40	40	31.3956	31.5499	34.0459	33.8675	40	40	40	40	30.5239	30.6648	40	40	32.4703	32.3439	31.3551	31.113	31.5945	31.5484
46	NM_007958.1	573638	Mm03053550_s1	Smarcad1	29.5882	29.2927	29.1954	28.7948	29.1919	29.2424	29.6961	29.4636	29.2412	29.2025	30.0694	29.7049	33.583	33.386	40	40	32.8865	32.7835	34.8575	34.8092	40	40	40	37.1019	38.3193	40	40	40	40	40	29.5005	29.3965	32.2642	32.7123	32.9342	32.7792
47	NM_010574.2	660571	Mm01340316_m1	Irx2	40	40	33.9781	34.6242	32.9092	33.1519	31.5993	31.5047	32.8435	32.4356	32.9053	32.7423	40	40	40	40	40	40	40	40	40	40	40	40	40	40	40	40	40	40	40	40	40	40	40	40
48	NM_008055.3	540192	Mm03053556_s1	Fzd4	40	40	40	40	40	40	40	40	40	40	40	40	40	40	40	40	40	40	40	40	40	40	40	40	40	40	35.2672	35.4113	40	40	40	40	40	40	40	40
49	NM_008958.2	552911	Mm00436047_m1	Ptch2	40	40	40	40	40	40	40	40	40	40	40	40	40	40	40	40	40	40	40	40	40	40	40	40	40	40	40	40	40	40	40	40	40	40	40	40
50	NM_175482.3	630598	Mm00615493_m1	Usp28	26.0349	26.0837	26.4426	26.4672	26.0086	25.6812	26.6261	26.3315	26.2345	25.9793	26.0104	25.9851	29.7022	29.4963	29.2981	29.3245	30.1513	30.1591	32.1313	32.5437	40	40	31.5084	31.5006	40	39.6039	30.916	30.9026	31.0075	30.984	29.1956	29.1164	30.0281	30.104	32.4414	32.4838
51	NM_009263.1	924589	Mm00436767_m1	Spp1	31.7565	31.8957	37.9387	36.1089	40	40	40	40	40	40	40	40	40	40	40	40	40	40	40	40	40	40	40	40	40	40	40	40	40	40	40	40	40	40	40	40
52	NM_008453.4	761963	Mm00627090_m1	Klf3	40	40	31.9683	31.5492	30.2863	29.8058	33.1697	33.0133	29.4849	29.6376	29.3669	29.345	31.6448	31.6086	40	40	40	40	33.9861	33.6873	33.434	34.2298	29.8884	29.8545	40	40	31.1332	31.2939	40	40	40	40	40	40	40	40
53	NM_009324.2	479027	Mm00436915_m1	Tbx2	40	40	40	40	40	40	40	40	40	40	40	40	40	40	40	40	40	40	40	40	40	40	40	40	40	40	40	40	40	40	40	40	40	40	40	40
54	NM_010351.1	664222	Mm00650681_g1	Gsc	29.0458	29.3186	30.9021	31.1293	40	40	29.9906	29.883	35.1794	34.5878	29.6857	29.5641	40	40	34.4624	36.5208	40	40	29.2307	29.3281	40	40	40	40	35.126	35.0774	36.9765	40	40	40	40	39.6438	40	40	40	40
55	NM_029575.2	298771	Mm00436977_m1	Tgfbr2	40	40	40	40	31.1758	30.7667	40	40	40	40	40	40	40	40	40	40	40	40	40	40	40	40	40	40	40	40	40	40	40	40	40	40	40	40	40	40
56	NM_023223.1	436043	Mm00650983_g1	Cdc20	29.0563	29.2432	28.3151	28.4692	28.781	28.5419	28.2983	27.9034	28.8911	28.9011	29.9143	29.7985	29.2759	28.9092	28.5759	28.42	30.1403	30.3333	27.4899	27.6406	28.6212	28.4888	28.2871	28.287	29.9486	29.6415	29.3915	29.346	29.1672	29.1542	27.5761	27.6221	26.6404	26.6769	29.3887	29.34
57	NM_009523.1	483662	Mm00437341_m1	Wnt4	40	40	40	40	40	40	40	40	40	40	40	40	40	40	40	40	40	40	40	40	40	40	40	40	40	40	40	40	40	40	40	40	40	40	40	40
58	NM_008700.2	533164	Mm00657783_m1	Nkx2-5	40	40	40	40	40	40	40	40	40	40	40	40	40	40	40	40	40	40	40	40	40	40	40	40	40	40	40	40	40	40	40	40	40	40	40	40
59	NM_009526.3	590115	Mm00437353_m1	Wnt6	40	40	40	40	40	40	40	40	40	40	40	40	40	40	40	40	40	40	40	40	40	40	40	40	40	40	40	40	40	40	40	40	40	40	40	40
60	NM_010151.2	672891	Mm00657937_m1	Nr2f1	40	40	40	40	40	40	40	40	40	40	40	40	40	40	40	40	40	40	40	40	40	40	40	40	40	40	40	40	40	40	40	40	40	40	40	40
61	NM_010205.1	908373	Mm00438922_m1	Fgf8	27.626	27.7695	27.469	27.3669	27.6241	27.4022	28.0325	27.7877	28.1786	28.23	28.2519	28.1935	40	40	40	40	30.2119	30.1528	40	40	40	40	40	40	40	36.5762	40	40	28.8038	28.7578	37.2384	35.3349	37.3174	40	33.9558	34.7772
62	NM_029094.2	558248	Mm00659576_m1	Pik3cb	31.7884	31.5493	32.0004	32.3683	31.3225	31.0247	30.9107	30.6211	30.9326	30.9275	29.7428	29.9328	30.2621	30.0158	40	40	31.6011	31.4131	38.7684	37.8277	40	40	36.4928	37.5917	40	40	40	37.5037	34.1313	33.684	32.2177	31.6949	31.7928	32.142	37.7687	37.8768
63	NM_010456.2	624786	Mm00439364_m1	Hoxa9	40	40	40	40	40	40	40	40	33.1902	34.0567	30.8786	31.0455	31.0873	30.5976	40	40	40	40	40	35.8233	40	40	40	40	40	40	40	40	40	40	40	40	40	40	40	40
64	NM_010496.2	511638	Mm00711781_m1	Id2	30.4603	30.8775	30.4402	30.7128	30.6712	30.2201	31.534	30.9453	30.2458	30.396	30.8575	30.9106	40	40	40	40	40	40	38.09	39.3359	37.8178	37.6109	38.5369	40	38.5286	40	40	40	40	40	38.9411	40	38.5837	40	40	40
65	NM_010544.2	623040	Mm00439613_m1	Ihh	40	40	40	40	40	40	40	40	40	40	40	40	40	40	40	40	40	40	40	40	40	40	40	40	40	40	40	40	40	40	40	40	40	40	40	40
66	NM_178596.2	829494	Mm00731344_s1	Gjc1	40	40	40	40	40	40	40	40	40	40	40	40	40	40	40	40	40	40	40	40	40	40	40	40	40	40	40	40	40	40	40	40	40	40	40	40
67	NM_010612.2	476466	Mm00440111_m1	Kdr	40	38.9389	37.0446	39.507	31.3051	31.2469	37.5545	39.5693	40	39.8184	38.0343	38.532	39.4971	38.4553	38.4102	37.8351	38.9059	38.1527	40	39.4368	38.2525	40	38.5315	39.0702	39.539	38.7303	40	39.0685	39.2218	39.8927	39.1535	39.5738	38.1833	37.9071	39.1858	40
68	NM_010495.2	907300	Mm00775963_g1	Id1	27.6813	27.6334	29.8421	29.8345	27.8441	27.6423	29.1396	29.0025	26.8084	26.8199	26.5397	26.6107	40	38.2639	40	40	29.1019	29.086	40	40	38.7118	38.2347	34.1522	35.0736	30.3049	30.1313	37.6333	36.3059	31.0164	31.1771	39.0827	37.2658	40	40	28.576	28.5772
69	NM_010866.1	847317	Mm00440387_m1	Myod1	40	40	40	40	40	40	40	40	40	40	40	40	33.4191	33.1816	38.2879	40	40	40	40	40	40	40	40	40	40	40	40	40	40	40	40	40	40	40	40	40
70	NM_020045.2	306600	Mm00777068_m1	Nfu1	25.6981	25.6004	25.0948	25.0286	25.2826	25.2063	25.1637	25.1283	25.2837	25.3365	26.0016	25.9051	29.3184	29.5437	27.1369	26.9891	29.1722	29.0917	27.8174	27.9244	30.2032	30.0285	28.5151	28.3365	30.3321	30.674	28.1842	28.145	27.224	27.196	26.1642	26.3369	26.2215	26.1831	26.7985	26.8361
71	NM_010884.1	916686	Mm00440447_m1	Ndrg1	40	40	40	40	40	40	40	40	40	40	40	40	40	40	40	40	40	40	40	40	40	40	40	40	40	40	40	40	40	40	40	40	40	40	40	40
72	NM_026030.2	383544	Mm00782672_s1	Eif2s2	25.073	24.9879	24.9489	24.7664	24.6092	24.5793	25.2357	25.2323	25.5924	25.6454	25.2552	25.3303	26.5005	26.6483	27.4072	27.2776	27.6311	27.7516	27.9299	27.825	29.2946	29.1539	36.5748	37.2463	30.1519	30.4132	28.6995	28.8895	30.6109	30.6269	26.3619	26.3191	27.4109	27.2919	28.4317	28.3788
73	NM_021788.1	798923	Mm01340504_m1	Sap30	25.828	25.7218	26.6717	26.8157	25.3935	24.8864	26.5376	25.942	24.9896	24.9842	25.6289	25.5339	28.932	28.5511	27.9138	27.9305	28.6204	28.5905	29.6046	30.8574	31.7584	31.3026	30.3608	30.0013	30.449	30.0863	29.5803	29.4425	28.3342	28.1215	28.5705	28.73	29.5747	29.3556	30.8965	31.0898
74	NM_008056.2	577406	Mm03053560_s1	Fzd6	40	40	40	40	40	40	34.9598	34.3757	40	40	40	40	40	40	40	40	40	40	40	40	40	40	40	40	40	40	40	40	40	40	40	40	40	40	40	40
75	NM_010413.2	643415	Mm01341125_m1	Hdac6	29.8647	30.7133	30.7091	30.7164	39.0242	40	40	40	30.9594	29.9425	32.4032	32.4719	30.1403	29.8991	40	40	40	40	40	38.6953	40	40	40	40	34.0504	33.8325	30.7378	30.622	31.1165	31.2086	36.7145	35.9267	32.4141	32.3399	31.3662	31.0778
76	NM_008090.4	298631	Mm03053564_s1	Gata2	29.3033	29.6043	40	40	40	40	30.8002	30.7853	29.1635	29.4441	30.9847	30.9723	40	40	40	40	40	40	40	40	40	40	40	40	40	40	40	40	40	40	30.2718	30.2621	35.7712	33.8903	40	40
77	NM_008011.2	642859	Mm01341852_m1	Fgfr4	40	40	40	40	40	40	40	40	40	40	33.1345	33.1495	31.9156	32.006	30.9584	31.1749	34.416	33.8098	32.4146	32.3832	40	40	40	39.1127	40	40	31.2496	31.0821	31.4456	31.4369	40	40	40	40	32.8448	32.8603
78	NM_008092.3	694012	Mm03053570_s1	Gata4	25.5876	25.6583	25.7661	25.6364	24.9187	25.008	25.7424	25.7354	24.695	24.7197	25.86	25.9771	24.029	24.1015	23.8183	23.9462	25.2522	25.174	24.8433	24.7629	25.6364	25.5015	24.8894	24.7571	27.801	27.8391	25.3687	25.2648	25.1216	25.1016	24.4905	24.4753	25.2238	25.2049	26.0212	25.9598
79	NM_008235.2	406680	Mm01342805_m1	Hes1	40	40	40	40	40	40	35.6466	35.0869	40	40	36.2482	40	40	40	40	40	40	40	40	40	40	40	40	40	40	40	40	40	40	40	40	40	40	40	40	40
80	NM_008093.1	620919	Mm03053574_s1	Gata5	40	40	40	40	40	40	40	40	40	40	40	40	40	40	40	40	40	40	40	40	40	40	40	40	40	40	40	40	40	40	40	40	40	40	40	40
81	NM_001018002.1	649681	Mm01343389_g1	Dppa4	29.0192	29.0498	28.9729	29.0305	28.3884	28.1923	28.4541	28.1169	28.0557	28.0158	27.378	27.5594	26.5106	26.2636	26.0858	25.9603	26.3588	26.3322	26.1114	26.1286	26.8275	26.7164	26.7399	26.7723	28.4837	28.2442	26.9704	27.0298	25.7012	25.6108	25.8833	25.9733	25.2444	25.6382	26.0296	26.1226
82	NM_008108.4	451340	Mm03053575_s1	Gdf3	40	40	40	40	40	40	40	40	40	40	40	40	40	40	40	40	40	40	40	40	40	40	40	40	40	40	40	40	40	40	40	40	40	40	35.5528	35.0538
83	NM_023844.4	609085	Mm01344071_m1	Jam2	40	39.4196	40	40	38.2326	37.9358	40	40	40	40	33.6259	33.6633	31.7735	31.6021	40	40	40	40	40	40	40	40	40	40	34.1666	34.0147	32.236	32.3597	33.5751	33.1674	40	40	40	40	40	40
84	NM_008130.2	588861	Mm03053580_s1	Gli3	28.3881	28.3754	29.5113	29.3056	28.7633	28.6467	29.505	28.8265	28.819	28.6437	28.7726	28.7429	40	40	40	40	40	40	40	40	35.2139	35.0807	35.3457	35.5047	40	40	31.7137	31.7072	39.8528	40	40	40	40	40	40	40
85	NM_172372.1	456347	Mm01347651_g1	Wdr45	30.0292	30.0569	30.2476	30.1039	30.2691	30.2879	30.6804	30.0195	28.2139	28.3133	28.3022	28.4534	26.0897	26.0367	26.2623	26.405	26.0148	26.1665	25.6509	25.6713	25.5329	25.5904	24.7154	24.7424	29.746	29.7604	25.3703	25.2785	26.0871	26.0809	24.6883	24.7514	25.534	25.5616	25.3018	25.2021
86	NM_008259.3	804134	Mm03053583_s1	Foxa1	33.6719	33.8056	40	40	40	40	40	40	40	40	40	40	29.937	29.6118	28.4354	28.1977	29.0016	28.8901	29.7505	29.576	40	40	28.9754	28.7856	30.8646	30.588	29.7765	29.7692	28.539	28.6176	35.7915	35.848	31.4218	31.2894	28.8261	28.3864
87	NM_007614.2	383961	Mm01350394_m1	Ctnnb1	27.6892	27.6131	30.2997	30.2495	27.0576	26.7193	28.4544	28.1143	28.2798	28.3097	27.2918	27.1513	26.0053	25.9285	24.9964	24.9096	25.1345	25.1056	25.8267	25.7903	28.8553	28.7144	26.6965	26.4211	28.056	28.0923	27.7696	27.7499	26.9571	26.839	27.725	27.6763	26.6452	26.6098	29.6475	29.6356
88	NM_008499.4	657343	Mm03053589_s1	Lhx5	40	40	40	40	35.9247	35.3607	37.1469	35.9513	40	40	40	40	40	40	40	40	40	40	40	40	40	40	40	40	40	40	40	40	40	40	40	40	40	40	40	40
89	NM_008841.1	656992	Mm01351773_g1	Pik3r2	40	40	28.709	28.9672	40	40	40	40	30.6576	30.294	40	40	40	40	40	40	40	40	40	40	34.7368	35.0962	28.1615	28.1741	29.7014	29.7418	28.9481	29.0963	36.1071	35.9059	34.0881	34.2654	29.2517	29.2244	27.7877	27.8658
90	NM_008501.2	645865	Mm03053594_s1	Lif	40	40	40	40	40	40	40	40	40	40	40	40	40	40	36.1192	35.3769	40	40	40	40	35.6706	34.9554	37.5192	37.9681	40	40	40	40	40	40	40	40	37.4042	37.5659	40	40
91	NM_009354.1	568446	Mm01352136_m1	Tert	29.9647	30.1821	30.5625	30.3992	29.8007	29.9449	31.5215	31.1586	32.7272	33.2092	33.7045	33.6372	40	40	30.5366	30.3038	30.335	30.3567	40	40	40	40	40	40	40	40	40	40	40	40	40	40	35.2798	35.68	40	40
92	NM_008506.2	680551	Mm03053598_s1	Mycl1	40	40	37.4282	38.0383	31.0754	31.2448	34.2676	33.7162	32.7481	32.4876	40	40	40	40	40	40	32.581	32.9006	38.8882	40	40	40	40	40	40	40	40	40	40	40	35.9709	35.8825	40	40	40	40
93	NM_009411.4	908401	Mm01352548_g1	Tpbpa	40	40	40	40	40	40	40	40	40	40	40	40	40	40	40	40	40	40	40	40	40	40	40	40	40	40	40	40	40	40	40	40	40	40	40	40
94	NM_008541.2	327658	Mm03053603_s1	Smad5	31.1494	30.9864	31.5771	31.5118	31.1674	31.3176	31.7384	31.7459	32.4336	31.9462	33.1347	32.4631	32.4974	32.1933	37.5479	40	34.5137	34.1823	33.7253	33.6358	37.2104	35.3335	40	40	40	40	40	40	32.3816	32.0432	40	40	40	40	40	40
95	NM_011562.2	482685	Mm01605858_g1	Tdgf1	40	40	40	40	40	40	40	40	40	40	40	40	37.9465	40	40	40	29.7172	29.8331	28.1696	28.2259	34.4535	35.3854	30.7911	30.6833	31.3568	31.3053	29.3803	29.5821	27.5344	27.6546	28.0246	27.8458	27.8817	27.9003	28.9839	28.8995
96	NM_008652.2	582194	Mm03053609_s1	Mybl2	24.3101	24.1701	24.0229	23.8613	23.6756	23.7173	24.1566	23.9709	24.3439	24.2046	24.6477	24.6829	24.8935	24.8845	23.9245	23.8931	25.5769	25.5276	24.2241	23.9749	26.6791	26.6289	25.8163	25.532	26.4105	26.4279	26.1411	26.091	25.1986	25.3151	24.6297	24.5237	26.0833	25.7917	24.9956	24.9547
97	NM_010929.2	929016	Mm00440536_g1	Notch4	40	40	40	40	40	40	40	40	40	40	40	40	40	40	40	40	40	40	40	40	40	40	40	40	40	40	40	40	40	40	40	40	40	40	40	40
98	NM_009052.2	621309	Mm00784371_s1	Bex1	40	40	40	40	40	38.5912	40	40	29.4438	29.4934	27.3139	27.417	28.8082	28.5504	28.9121	28.9089	27.9776	28.0371	27.4201	27.4927	30.3417	30.4301	28.4149	28.3513	31.1866	31.0955	29.0809	28.8458	27.5143	27.3465	30.0871	30.0068	29.3498	29.1526	29.6924	29.9202
99	NM_011244.3	652285	Mm00441091_m1	Rarg	33.6561	34.5474	40	40	40	40	34.5775	35.1388	31.7147	31.5417	31.8331	31.8683	29.9171	29.8908	30.6894	30.9124	30.2027	30.4612	30.0556	29.9321	30.1078	30.2652	30.884	31.1389	29.4253	29.3775	29.9489	30.0644	28.2326	28.157	29.2572	29.5422	30.2978	30.3498	29.9028	29.8797
100	NM_018810.2	763602	Mm00785672_s1	Mkrn1	27.8389	27.778	27.9507	27.9392	28.4796	28.0301	28.0532	27.749	27.3994	27.3107	28.9198	28.8734	30.1092	29.9803	28.8902	28.9469	30.4703	30.4576	28.9916	29.1259	31.8331	31.4619	29.7968	29.9519	32.9721	32.9348	27.9395	27.8964	28.8383	28.8073	27.764	27.5951	30.2673	30.3836	30.1311	30.4874
101	NM_011306.3	923203	Mm00441197_gH	Rxrb	40	40	40	40	40	40	40	40	40	40	40	40	40	40	38.6292	38.3564	40	40	33.8179	34.0949	40	40	34.8232	34.8957	40	40	30.8171	31.1318	40	38.2953	40	38.7749	39.173	37.7273	40	40
102	NM_010258.3	500605	Mm00802636_m1	Gata6	40	40	31.4089	31.2673	36.0351	35.8738	32.6039	32.3842	29.2274	29.1999	32.9682	32.5811	40	40	40	40	36.9041	35.3756	40	40	30.1518	30.4187	32.5975	32.4698	40	40	40	40	33.8323	34.3323	29.7838	29.8963	30.035	30.247	33.152	32.5767
103	NM_011361.1	929684	Mm00441387_g1	Sgk	28.7117	28.8618	40	35.2119	31.1046	30.8484	29.1535	28.8818	34.3918	35.1617	36.0476	40	27.9478	27.7976	40	40	28.1675	28.0836	37.3586	36.0547	27.6546	27.7564	27.5683	27.5964	40	40	28.5805	28.8959	33.938	34.4471	27.213	27.1964	27.6537	27.9319	28.5316	28.4529
104	NM_025890.2	873889	Mm00804161_g1	2410004A20Rik	29.8515	29.888	29.4545	29.7367	28.8939	28.8204	28.947	28.6377	30.5831	30.6204	28.4322	28.5105	40	39.5835	29.2203	29.3041	30.2004	30.4251	34.3565	35.689	27.2062	27.184	27.4976	27.6606	40	40	31.3843	31.6951	30.0817	29.8925	30.7181	30.575	29.3244	29.3319	28.2935	28.161
105	NM_011538.2	454931	Mm00441681_m1	Tbx6	40	40	40	40	40	40	40	40	33.4493	34.0417	40	40	40	40	40	40	40	40	40	40	40	40	31.7813	31.2731	40	40	40	40	40	40	40	40	40	40	40	40
106	NM_001024955.1	406238	Mm00808818_s1	Pik3r1	28.9351	29.2223	29.7954	29.8359	28.8369	28.3375	29.9086	29.2177	29.6459	29.6337	29.1038	29.3533	40	33.1802	36.6005	36.4034	40	40	33.8476	33.7725	40	40	40	40	40	40	31.7483	31.661	31.9585	31.7119	40	40	35.6129	35.6309	34.1262	34.5797
107	NM_013555.3	738419	Mm00442840_m1	Hoxd9	40	40	40	40	40	40	31.244	31.1093	33.1599	33.4202	31.969	31.9587	40	40	40	40	40	40	40	40	40	40	40	40	40	40	40	40	40	40	40	40	40	40	40	40
108	NM_177070.3	391784	Mm00838714_m1	Fbxw16	26.3255	26.2885	26.102	26.2244	27.284	26.6114	27.174	26.7489	26.8821	26.7886	26.8311	26.9129	31.0767	30.8156	29.3495	29.2732	29.846	29.8099	30.3498	30.5382	32.6157	32.7012	29.8509	30.1215	31.1163	31.0998	34.987	34.964	30.889	30.7082	29.7235	29.8058	29.4547	29.661	30.3502	30.5486
109	NM_013611.3	383541	Mm00443041_m1	Nodal	40	40	40	40	40	40	40	40	40	40	40	40	40	40	40	40	40	40	40	40	40	40	40	40	40	40	40	40	40	40	40	40	40	40	40	40
110	NM_008262.3	694444	Mm00839394_m1	Onecut1	35.1183	35.1939	29.941	29.8486	31.1117	30.5309	28.1484	27.8458	31.3006	30.9333	29.978	29.7448	40	40	40	40	40	40	40	40	40	40	40	40	40	40	40	40	28.5555	28.4931	28.3027	28.2321	29.422	29.293	37.4622	40
111	NM_013627.4	630797	Mm00443081_m1	Pax6	38.1764	37.3483	30.7265	30.8382	30.4354	30.0169	40	40	29.1998	29.3871	30.0584	30.428	40	40	40	40	29.5303	29.6457	30.4517	30.4788	37.4569	37.7768	31.4635	31.7163	40	40	30.077	30.3147	40	40	40	40	35.734	36.3592	40	40
112	NM_009235.1	818349	Mm00839542_g1	Sox15	28.3773	28.4311	31.0519	30.6791	36.2124	35.8972	29.5237	29.2736	40	40	29.9155	29.8862	25.2111	24.9622	24.0505	23.9148	25.3915	25.4428	25.9083	25.8679	23.941	23.8603	23.4626	23.4957	26.1703	26.1125	24.1	24.0536	24.9811	25.0079	24.3382	24.2584	26.3188	26.2626	25.2049	25.241
113	NM_021458.1	813453	Mm00445423_m1	Fzd3	31.2264	31.1395	29.9573	29.9482	31.9683	31.2141	36.9772	35.9992	28.4899	28.4859	31.9243	31.848	40	40	31.0153	31.321	28.7186	28.7658	26.8085	26.8774	35.5789	36.6684	40	40	34.6746	33.9998	28.5665	28.5631	40	40	34.7962	34.9613	31.9188	32.0944	40	40
114	NM_025923.2	457575	Mm00840321_m1	Fancl	31.0415	30.9009	40	40	40	40	37.7151	36.493	40	40	40	40	32.2172	33.2941	40	40	40	40	40	40	40	40	32.3493	32.2375	40	40	40	36.6631	40	40	34.3295	34.1577	36.3314	38.0043	37.8819	40
115	NM_021878.2	932017	Mm00445574_m1	Jarid2	27.203	27.3406	26.8849	26.7717	26.8435	26.7243	26.7938	26.6759	27.9315	27.9699	26.5257	26.4791	28.102	27.881	27.6783	27.6477	29.4614	29.308	26.9566	26.985	31.5242	31.8473	26.4715	26.5155	33.4975	34.1792	27.0278	27.0258	28.3758	28.539	26.5019	26.6651	26.5318	26.4587	27.1489	27.1262
116	NM_009447.3	509694	Mm00849767_s1	Tuba4a	29.4391	29.6727	29.8252	29.8943	28.6069	28.1809	29.8808	29.5854	29.5736	29.6406	29.5732	29.5624	30.6079	30.3944	35.1152	36.4375	40	40	36.2112	36.5679	30.6051	30.5986	28.7553	28.5993	40	40	30.0869	29.8278	40	40	31.8576	31.3575	30.3792	30.4207	40	40
117	XM_284250.4	817038	Mm00446061_m1	Etnk1	40	40	40	40	40	40	40	40	29.2511	29.1048	28.7307	28.7762	27.1336	27.084	27.7849	27.7721	27.5584	27.667	27.204	27.3029	26.4035	26.3177	26.6979	26.7354	27.9026	27.9796	26.1815	26.215	32.6544	32.2538	28.8378	28.8322	28.3593	28.2459	29.3876	29.5969
118	NM_030694.1	897017	Mm00850080_g1	Ifitm2	40	39.3874	40	40	40	40	40	40	40	40	40	40	39.4218	40	30.4622	30.4989	30.8111	30.8816	29.7677	29.9498	30.1851	30.3722	29.9711	29.9125	31.8035	31.9762	30.3243	30.1248	35.9381	36.3391	29.6863	29.7492	40	40	40	40
119	NM_013556.2	907246	Mm00446968_m1	Hprt1	24.5422	24.57	24.3181	24.3494	24.4232	24.3996	24.5042	24.345	23.924	24.1403	24.1335	23.9244	22.9727	23.064	23.3024	23.0011	23.033	23.0652	22.9041	22.9477	22.7145	22.9522	22.1434	22.2976	24.8729	24.9665	22.5451	22.5842	22.7571	22.789	22.3913	22.4501	22.6077	22.3865	23.8242	23.7028
120	NM_008514.3	691244	Mm00999795_m1	Lrp6	30.1046	30.0717	29.3112	28.9679	29.3884	29.4771	28.8533	28.179	29.73	29.5849	29.6184	29.6188	29.8086	29.7903	31.7627	32.1274	34.029	34.6583	30.1143	30.7787	31.3655	31.3245	30.8499	31.0869	40	40	40	40	32.2075	32.1461	31.2124	31.4594	33.7654	33.7366	31.257	31.265
121	NM_027181.1	897264	Mm01609848_g1	Pin4	40	40	31.6235	31.2951	31.8605	31.6184	35.3288	35.2957	36.7685	36.7674	34.5818	35.3443	31.6918	31.8534	28.7476	28.865	36.7545	35.8565	30.5591	30.1501	34.0383	33.5207	30.1045	30.0111	34.0768	34.3463	31.6864	31.6603	32.0608	31.6882	33.8038	33.4553	34.5669	34.421	30.9074	31.0107
122	NM_008714.2	636359	Mm03053614_s1	Notch1	40	40	40	40	40	37.5486	30.9617	30.4398	40	40	40	40	40	40	40	40	40	40	40	40	40	40	40	40	40	40	40	40	40	40	40	40	35.3478	36.2467	35.5514	36.9585
123	NM_009031.2	764632	Mm01702744_mH	Rbbp7	25.0396	25.3572	24.9572	24.7084	25.355	24.9986	25.7646	24.9459	24.862	25.2211	25.8934	25.5933	26.8835	26.2491	26.5911	26.6442	27.8265	27.8203	27.6018	27.7042	28.5507	28.5929	28.3474	28.2592	29.5889	29.485	27.4182	27.3577	27.1913	27.2387	27.0025	27.1312	28.2981	28.3039	28.5955	28.4951
124	NM_008716.2	402835	Mm03053620_s1	Notch3	40	40	40	40	40	40	40	40	40	40	40	40	32.7584	34.9536	40	40	40	40	40	40	40	40	34.2852	33.9101	40	40	40	40	32.904	32.7547	30.7108	30.4646	40	40	34.0808	33.2736
125	XM_890550.1		Mm01736348_gH	LOC626000	40	40	40	40	40	40	40	40	40	40	40	40	40	40	40	40	40	40	40	40	40	40	40	40	40	40	40	40	40	40	40	40	40	40	40	40
126	NM_008888.2	421078	Mm03053629_s1	Phox2b	35.6893	33.9823	34.4969	33.6127	40	40	40	40	35.9783	40	40	40	38.9313	40	40	40	38.8715	40	40	40	40	40	39.5579	36.9983	40	40	40	36.9205	40	40	40	40	40	40	40	40
127	NM_010894.2	704303	Mm01946604_s1	Neurod1	40	40	40	40	40	40	33.6098	32.4	40	40	40	40	40	40	40	40	40	40	40	40	40	40	40	40	40	40	40	40	40	40	40	40	40	40	40	40
128	NM_008960.2	311734	Mm03053634_s1	Pten	31.8677	31.6868	34.3994	36.333	35.314	35.8432	40	36.2999	39.6626	40	29.6634	29.4833	33.8291	33.5692	36.2794	35.1103	29.4107	29.4887	40	40	40	39.1654	40	40	40	40	40	40	40	40	40	40	31.5399	31.8791	40	40
129	NM_007553.2	380631	Mm01962382_s1	Bmp2	32.5106	32.9578	40	40	40	40	40	40	40	40	40	40	40	40	40	40	40	40	40	40	40	40	40	40	40	40	40	40	40	40	40	40	40	40	38.1005	35.8548
130	NM_008971.4	675919	Mm03053638_g1	Twf1	29.5775	29.6021	29.4926	28.9067	28.9903	28.3087	29.5519	28.4303	28.7369	28.9441	30.494	29.9497	30.9419	30.5669	30.593	30.4939	29.8187	29.5646	28.7272	29.1544	30.0784	29.7865	29.0489	28.7226	36.5294	35.6167	29.3227	28.8125	29.2569	28.9699	29.2007	29.0622	29.7396	29.493	32.1892	32.161
131	NM_008592.2	488252	Mm01962704_s1	Foxc1	34.1845	33.4489	33.8658	32.9344	40	40	32.5815	32.1367	33.3883	34.0408	34.0886	33.1592	40	40	40	40	40	40	40	40	40	40	40	40	40	40	40	40	40	40	40	40	40	40	40	40
132	NM_009035.4	913314	Mm03053645_s1	Rbpj	40	36.0384	40	40	40	40	35.5162	40	32.5561	32.5139	30.2518	29.4554	40	40	40	40	40	40	40	40	40	40	40	40	40	40	40	40	40	40	40	40	40	40	40	40
133	NM_010446.2	305939	Mm01976556_s1	Foxa2	40	40	40	40	40	40	40	40	36.2779	40	40	40	40	40	40	40	40	40	40	40	40	40	40	40	40	40	40	40	40	40	40	40	40	40	40	40
134	NM_009170.2	406565	Mm03053649_s1	Shh	31.4131	31.1027	31.1057	30.7933	29.9254	29.7976	32.5109	30.9153	32.5914	31.959	31.4459	31.1612	40	40	40	40	40	40	40	40	40	40	40	40	40	40	40	40	33.5266	34.4771	40	40	40	40	40	40
135	XM_132755.5	593412	Mm02019550_s1	Nanog	37.2946	40	36.5583	38.1348	40	40	40	40	37.7371	40	40	40	40	40	40	40	29.429	29.5117	30.415	30.5638	30.9937	31.1105	30.5619	30.5962	40	40	33.8621	33.3879	31.1942	30.6957	35.0769	35.5266	40	40	32.1235	32.1563
136	NM_009234.5	413850	Mm03053654_s1	Sox11	31.0439	32.6441	40	40	40	40	40	40	29.489	40	40	40	40	40	40	40	40	40	38.6108	40	40	40	40	40	40	40	40	40	40	40	31.5037	31.9372	40	40	40	40
137	NM_010425.3	829244	Mm02384867_s1	Foxd3	40	40	40	40	40	40	40	40	40	40	40	40	40	40	40	40	40	40	40	40	40	40	40	40	40	40	40	40	40	40	40	40	40	40	40	40
138	NM_009370.2	730247	Mm03053658_s1	Tgfbr1	31.8482	31.6445	30.4219	29.9439	32.066	31.7453	32.3567	31.3677	28.7055	28.6293	29.1971	29.0513	29.6352	28.1963	30.8202	30.8791	32.2021	31.5871	29.5292	29.5377	36.1437	38.1652	30.7826	30.7808	35.3811	35.784	38.9521	36.8951	32.8573	31.9639	30.0701	30.1503	36.2448	36.0731	34.5936	34.8698
139	NM_008722.2	726734	Mm02391781_g1	Npm1	23.4996	23.5931	22.8553	22.7667	23.5955	23.2512	23.2697	22.8229	23.9817	23.9274	23.7452	23.756	26.8425	26.3003	25.745	25.7229	26.8586	26.77	26.1666	26.2543	26.1925	25.9562	25.2942	25.3634	27.7285	27.4855	24.7782	24.756	25.3079	25.3513	24.7731	24.7784	24.338	24.2394	27.3789	27.3656
140	NM_009521.1	431822	Mm03053665_s1	Wnt3	40	40	40	40	40	40	40	40	40	40	40	40	40	40	40	40	40	40	40	40	40	40	40	40	40	40	40	40	40	40	40	40	40	40	40	40
141	NM_178248.2	639564	Mm02525620_g1	Pramel4	40	40	40	40	40	40	40	40	40	40	40	40	40	40	40	40	40	40	40	40	40	40	40	40	36.5583	35.3922	40	40	40	40	40	40	40	40	40	40
142	NM_009522.1	467253	Mm03053669_s1	Wnt3a	40	40	40	40	40	40	40	40	40	40	40	40	40	40	40	40	40	40	40	40	40	40	40	40	40	40	40	40	40	40	40	40	40	40	40	40
143	NM_008157.1	931046	Mm02619790_s1	Gpr19	31.7843	31.7596	29.7803	30.0394	31.4631	31.2852	30.3736	29.6673	30.437	30.4009	32.7025	32.3032	37.6002	36.5442	31.0092	30.6492	37.7114	36.0737	36.6658	38.8518	40	40	32.3773	32.1247	36.3706	36.7405	32.3337	32.4121	31.7925	31.8456	30.1486	30.3833	31.7831	31.7848	32.3883	32.4434
144	NM_009524.2	734899	Mm03053674_s1	Wnt5a	40	40	40	38.5039	40	40	40	40	40	40	40	40	40	40	40	40	40	40	40	40	40	40	40	40	40	40	40	40	40	40	40	40	40	40	40	40
145	NM_009330.2		Mm00447459_m1	Hnf1b	40	40	40	40	40	40	40	40	40	40	40	40	40	40	40	40	40	40	40	40	40	40	40	40	40	40	40	40	40	40	40	40	40	40	40	40
146	NM_145830.1	738610	Mm01132261_m1	Ehmt2	40	40	40	40	29.5759	29.4702	29.5669	29.537	31.9824	31.9787	28.4361	28.3476	24.8463	24.968	25.3389	25.4467	25.5723	25.608	25.2172	25.2313	25.4316	25.453	24.471	24.4275	27.7857	27.8469	24.8143	24.7824	25.913	25.8984	24.9425	24.9513	24.8433	24.8327	25.2773	25.2564
147	NM_009477.2	595304	Mm00447676_m1	Upp1	28.8559	28.9853	27.4781	27.6056	34.104	33.8008	27.3795	27.3355	26.9286	26.8716	29.1109	28.9404	27.2059	26.8602	28.4589	28.709	27.2155	27.1309	27.3227	27.4475	27.9406	28.0052	34.0668	35.2073	30.2003	30.1967	29.5424	29.7729	28.9207	28.8711	32.1914	32.9408	33.4377	33.5636	40	40
148	NM_145076.3	587871	Mm01136964_m1	Trim24	25.5374	25.7603	25.3167	25.2717	25.8107	25.5611	25.8179	25.4353	25.4705	25.3883	25.6619	25.6353	28.9501	28.9985	29.2104	29.4384	30.9879	30.6665	28.6419	28.6767	28.6292	28.9087	30.412	30.5387	33.1029	32.5718	28.3155	28.2634	28.6198	28.4233	28.0019	27.8876	28.9632	28.9315	30.5581	30.3331
149	NM_009482.2	786361	Mm00447703_g1	Utf1	31.9838	32.087	40	40	40	37.8939	40	40	40	40	37.7692	40	29.2096	29.002	28.3727	28.5572	33.1447	33.796	31.1471	31.3546	36.0762	40	40	37.5149	29.1742	29.0895	28.9089	29.0263	40	40	31.0775	30.7964	28.4475	28.2132	39.1458	40
150	NM_010066.3	744282	Mm01151062_g1	Dnmt1	26.8216	26.92	26.7324	26.7282	26.2142	25.4888	26.6146	26.4046	26.8858	27.0264	27.2917	27.2459	26.9399	26.845	28.1891	28.3345	26.9571	27.0286	26.3631	26.1194	29.3198	29.5743	26.9655	27.0803	32.4273	32.5165	26.6423	26.6166	25.8352	25.8726	25.9477	26.6904	28.2857	28.3187	29.5582	29.5132
151	NM_011045.2	893264	Mm00448100_g1	Pcna	25.2824	25.4653	24.8851	25.0316	25.5453	24.9571	24.9385	24.5083	25.0795	25.1205	24.6908	24.6875	27.6614	27.2887	27.1198	27.1872	27.0775	27.2738	27.0433	27.13	26.8977	26.8996	26.0797	26.2392	28.7961	28.9342	26.6821	26.7275	28.2773	28.5148	27.7829	27.8266	27.2821	27.3507	28.6363	28.694
152	NM_009284.2	606198	Mm01160477_m1	Stat6	27.2246	27.1455	26.2819	26.2379	27.1889	27.1119	27.2661	27.1362	27.3634	27.2977	27.7951	27.8199	40	40	40	40	40	40	40	40	40	40	40	40	40	40	40	40	40	40	40	40	40	40	40	40
153	NM_020560.1	926146	Mm00451580_m1	Mrps31	30.1402	30.3954	30.4756	30.5026	33.0526	32.6608	30.5331	30.3737	31.8018	32.155	31.2943	30.9854	28.5849	28.2608	30.5018	30.3139	29.6538	29.8369	28.0314	28.0133	28.3343	28.3725	27.9653	27.9448	29.3413	29.2914	28.4836	28.483	27.1899	27.2719	28.1186	27.9768	28.4583	28.36	28.8976	28.9588
154	NM_009292.1	470026	Mm01165142_m1	Stra8	40	40	40	40	40	40	40	40	40	40	32.5442	32.218	40	40	40	40	40	40	40	40	40	40	40	40	40	40	40	40	40	40	40	40	40	40	40	40
155	NM_022411.3	436433	Mm00452099_m1	Slc13a2	33.0465	33.6386	40	40	36.0422	37.8207	40	40	40	40	40	40	29.2122	29.0458	30.1706	30.3097	30.5282	30.6022	28.3415	28.3397	27.6642	27.4477	28.2334	28.2032	29.6877	29.5135	29.9113	29.8978	28.3756	28.5314	27.9491	27.9803	26.6931	26.7472	27.546	27.6772
156	NM_007630.2	478962	Mm01171453_m1	Ccnb2	24.0489	24.3976	23.7396	23.5496	24.3255	24.2427	24.105	24.0074	24.728	24.772	24.6545	24.3871	25.6971	25.7897	26.1913	26.1781	27.6822	27.598	25.4949	25.5139	26.0392	26.065	25.6062	25.7241	27.6689	27.7488	27.022	27.1871	26.1997	25.9743	25.2342	25.1234	26.077	25.9908	27.0047	26.5542
157	NM_175303.3	749421	Mm00453037_s1	Sall4	25.0623	25.1046	25.3002	25.1206	24.7529	24.5217	25.4296	25.369	24.6663	24.7387	25.2731	25.4011	25.8669	25.851	26.1508	26.123	28.7081	28.7996	25.7459	25.7133	25.8166	25.7983	24.7742	24.6962	27.7155	27.808	24.8932	25.0504	24.4635	24.5033	25.7311	25.6552	25.543	25.7543	26.1265	25.9245
158	NM_025274.2	896585	Mm01171664_g1	Dppa5	25.958	26.0193	26.5009	26.497	25.4262	25.3402	26.0948	25.9549	24.7355	24.6659	23.6671	23.7584	21.6476	21.6193	20.7072	20.7143	21.7282	21.8111	21.1418	21.2499	21.1148	21.1332	20.6856	20.6985	22.9367	22.9555	21.3415	21.3302	22.0677	22.0718	21.4181	21.3292	21.2301	21.1813	21.8091	21.7485
159	NM_001013745.1	921996	Mm00456405_m1	Zfp57	24.9195	24.9671	24.5466	24.6789	25.425	25.193	24.9017	24.7689	25.7736	25.9175	26.266	26.2539	30.2847	30.2277	30.6495	30.4649	31.2478	31.3903	28.6909	28.728	29.2311	29.2385	29.1864	29.5269	35.6023	36.3397	32.6409	32.8657	29.6422	29.7258	27.3964	27.4865	28.0036	28.0942	28.9573	28.8832
160	NM_175329.3	491407	Mm01173486_m1	Ndg2	30.5737	30.6377	29.6586	29.7684	29.166	28.9855	29.7855	29.6863	29.676	29.913	28.7875	28.8543	28.8179	28.869	27.9676	28.0289	28.3821	28.3629	28.3804	28.3728	32.7454	32.8205	28.7007	28.6233	31.8496	31.8673	29.1331	29.0015	29.5399	29.4097	29.361	29.1478	29.5387	29.4703	30.6585	30.6047
161	NM_009769.4	731278	Mm00456521_m1	Klf5	29.9603	30.0153	40	40	29.8492	29.3862	29.8974	29.6625	31.155	31.1311	28.9809	29.0749	30.732	30.2484	29.1079	29.1152	29.7599	29.7341	40	38.0649	29.7991	29.8368	30.4997	30.4601	35.0336	35.087	28.2527	28.3339	40	40	29.4378	29.6028	27.5766	27.5422	31.2747	31.4689
162	NM_009013.3	500653	Mm01183117_m1	Rad51ap1	30.3843	30.1915	32.8207	32.249	30.4076	29.9203	30.5593	29.9742	36.4275	36.296	30.0877	30.0871	30.8405	31.004	30.4357	30.3753	29.5015	29.3574	31.1048	31.2592	32.4613	32.1896	29.8725	30.0518	33.6391	33.5093	32.5417	32.707	29.5617	29.6649	29.7748	29.9606	31.5451	31.7447	30.8317	30.794
163	NM_019433.1	470696	Mm00457624_m1	Mtmr7	27.6892	27.7703	26.9374	26.8248	27.6112	27.4984	26.7892	26.6263	27.8519	27.8302	27.2656	27.4256	40	40	40	40	40	40	33.8008	34.1174	40	40	40	40	40	40	38.2056	37.9641	31.1913	31.1012	36.3847	37.9905	40	40	40	40
164	NM_009525.2	929862	Mm01183986_m1	Wnt5b	40	40	40	40	40	40	40	40	40	40	40	40	40	40	40	40	40	40	40	40	40	40	40	40	40	40	40	40	40	40	40	40	40	40	40	40
165	NM_019448.3	675466	Mm00457635_m1	Dnmt3l	25.2148	25.3098	24.9732	24.9541	24.9601	24.9523	25.122	25.0175	24.8414	24.9486	24.8802	24.8467	26.9687	26.8773	25.884	25.8703	28.6926	28.8126	25.6754	25.7023	36.1642	36.6558	29.4164	29.4313	33.466	32.5971	27.5502	27.7016	26.7101	26.906	26.7686	26.8685	30.386	30.6429	26.7436	26.7359
166	NM_007905.2	498074	Mm01184176_m1	Phc1	25.9393	26.029	26.7217	26.6189	26.6692	26.4829	25.4382	25.4238	26.2446	26.3023	27.1188	27.1964	29.6928	29.5978	32.658	33.4987	40	40	34.7064	34.1184	40	40	27.4261	27.3818	29.8366	29.9444	27.8559	27.8675	33.8822	33.7133	27.5457	27.5636	27.5021	27.5422	30.2083	30.3524
167	NM_022409.1	435181	Mm00458148_m1	Zfp296	24.994	24.935	25.5011	25.3215	24.6497	24.4278	24.6839	24.5697	25.8123	25.7615	24.4686	24.4968	26.03	25.9173	25.9024	26.1437	28.2107	28.1171	27.1899	27.2205	24.9635	24.8813	25.5411	25.4663	28.7893	28.7518	26.9069	26.8918	27.5522	27.2604	25.2687	25.1614	25.7922	25.8751	26.394	26.4026
168	NM_139218.1	893323	Mm01184198_g1	Dppa3	20.8325	20.6921	20.5316	20.4135	20.5633	20.4017	20.6757	20.4338	21.1579	21.2203	20.8369	20.7884	21.2972	21.0866	21.1562	21.0955	21.6541	21.6388	21.5389	21.5439	21.3053	21.4028	20.5435	20.5583	22.8214	22.9305	21.0117	20.8859	21.5109	21.5597	21.1764	20.8685	21.074	21.2047	22.1723	22.24
169	BC092070.1	343169	Mm02745760_g1	Hdac1	25.5437	25.5665	26.4782	26.4193	26.1537	25.9643	26.5391	26.3638	26.1996	26.142	25.4041	25.53	25.2213	25.0347	24.818	24.8187	25.8387	25.822	25.1083	25.1571	24.6294	24.6314	24.8257	24.8855	27.9813	28.0798	25.2924	25.2338	24.5879	24.5363	24.6213	24.7165	24.0027	23.923	24.842	24.8529
170	NM_009527.3	742157	Mm03053679_s1	Wnt7a	40	40	40	40	40	40	40	40	40	40	40	40	40	40	40	40	40	40	40	40	40	40	40	40	40	40	40	40	40	40	40	40	40	40	40	40
171	NM_008110.1	403957	Mm03024153_u1	Gdf9	26.3853	26.5955	25.8037	25.7874	26.1672	25.9302	26.4606	26.1958	26.3193	26.3559	26.9196	27.0573	30.1075	29.888	28.7865	28.5857	27.8316	27.8389	30.8702	30.7395	34.9613	34.6611	28.4841	28.4251	30.5164	30.6559	29.7646	29.7308	28.8882	28.5365	28.3374	28.2279	27.2746	27.2318	28.6614	28.4984
172	NM_009528.2	476272	Mm03053683_s1	Wnt7b	40	40	40	40	40	40	40	40	30.1309	30.2181	40	40	40	40	40	40	40	40	31.7823	31.6063	40	40	40	40	40	40	40	40	40	40	27.5797	27.4465	40	40	32.5565	33.0217
173	NM_010094.3	378445	Mm03024199_gH	Lefty1	40	40	40	40	40	40	40	40	40	40	40	40	40	40	40	40	40	40	40	40	40	40	40	40	40	40	40	40	40	40	40	40	40	40	40	40
174	NM_009575.2	681378	Mm03053689_s1	Zic3	40	40	37.5639	40	40	40	40	40	40	40	34.4791	33.6172	40	40	40	40	40	40	30.7529	30.7003	40	40	40	40	40	40	40	40	40	40	40	40	40	40	40	40
175	NM_009051.3	637385	Mm03029904_g1	Rex2	25.595	25.8862	26.2664	26.0221	25.7887	25.2302	26.3801	25.597	26.1118	26.1735	25.9912	26.201	27.1868	26.5789	26.8038	26.7844	27.3985	27.505	27.0176	27.1602	28.5327	28.5168	27.554	27.4443	29.9349	29.7797	27.5252	27.6318	26.9464	27.0966	27.2584	27.0749	27.7706	27.7217	28.3755	28.5297
176	NM_009612.2	376150	Mm03053695_s1	Acvrl1	29.3895	29.3517	30.2554	30.314	35.355	34.78	33.3395	32.8833	32.8112	32.2614	28.6757	28.7761	27.2713	27.2494	25.6058	25.4797	32.0639	32.4577	32.7054	32.7454	30.9791	30.7849	31.4416	31.7993	40	40	26.9241	26.8592	28.1574	28.0059	40	40	30.8673	30.8682	31.7432	31.8925
177	NM_008955.1	408679	Mm03048200_m1	Rhox6	40	40	40	40	40	40	40	40	40	40	40	40	40	40	40	40	40	40	40	40	40	40	40	40	35.0793	35.2795	35.6174	35.2426	40	40	40	40	40	40	40	40
178	NM_009757.3	584264	Mm03053703_s1	Bmp15	25.1928	25.1183	24.3411	24.1867	25.1126	24.972	24.8868	24.2317	25.7194	25.5559	25.917	25.8386	34.7627	34.3225	40	39.4606	37.7422	40	33.3951	33.6811	38.0857	38.0906	33.9803	33.4787	39.5776	38.2862	36.4969	37.1783	32.3202	32.246	31.8929	32.0831	33.5541	33.3297	35.1688	35.0322
179	NM_178250.2	342598	Mm03048632_g1	Pramel7	27.9319	27.9516	29.0659	29.1053	28.7461	28.7761	28.4466	28.4437	28.7709	28.9594	27.9482	28.1041	27.9153	27.8503	28.079	28.2425	28.9422	29.04	28.2544	28.2473	26.8024	26.5791	26.8034	26.8281	29.1963	29.2632	26.7892	26.6126	29.0102	29.0422	26.1701	26.1955	25.8319	25.9512	27.7807	27.7091
180	NM_009758.4	365106	Mm03053707_s1	Bmpr1a	40	40	40	40	40	40	40	40	34.582	34.8175	34.3503	33.8514	31.9048	31.439	31.6824	31.4112	32.8429	32.678	32.5134	32.2187	39.6447	40	35.1653	35.2026	37.0795	38.4619	33.3752	33.1921	32.8402	32.65	32.3187	32.3056	33.9612	33.6746	36.3527	35.3978
181	NM_025378.2	925708	Mm03052142_s1	Ifitm3	24.5882	24.731	24.2468	24.2004	24.4164	24.2907	24.6169	24.5249	24.403	24.4372	24.5547	24.5884	32.7704	33.606	29.4506	29.6351	40	36.4577	27.5116	27.454	38.561	40	30.6556	30.5276	32.2103	32.3401	35.2052	34.5558	27.3016	27.4499	40	40	28.9162	28.8496	29.3413	29.4883
182	NM_009829.3	453309	Mm03053712_s1	Ccnd2	40	40	40	40	40	40	40	40	40	40	40	40	40	40	40	40	40	40	40	40	40	40	40	40	40	40	40	40	40	40	29.4113	29.1753	40	40	40	40
183	NM_016683.1	457013	Mm03053238_s1	Zkscan5	25.2744	25.3245	24.81	24.8536	24.7573	24.7056	25.8509	25.6689	24.3988	24.4141	25.7844	25.5961	27.9428	27.716	27.2637	27.3046	34.332	34.7197	26.2243	26.218	26.0156	26.0511	28.214	28.1382	29.4596	29.4125	28.4886	28.57	26.6224	26.5183	23.9977	24.1191	25.8606	25.7562	26.1399	26.1525
184	NM_009864.2	925329	Mm03053716_s1	Cdh1	26.3416	26.3256	26.7636	26.5918	26.1959	26.2314	26.9895	26.5873	25.3471	25.2604	25.5417	25.3905	29.7974	29.5659	33.201	32.968	28.5149	28.2578	27.7573	27.7521	29.3468	29.1485	32.9508	32.7666	29.5354	29.3263	28.9237	28.8324	28.1424	28.116	29.3839	29.1164	30.2826	30.3977	29.9873	29.913
185	NM_016701.3	675815	Mm03053244_s1	Nes	40	40	31.0564	30.7629	33.4771	33.3041	33.7693	33.3915	32.1484	32.8335	31.0968	30.7364	36.669	37.5297	34.5053	34.9611	40	40	29.6864	29.9256	35.7176	36.4054	30.7518	30.7845	40	40	40	40	40	40	30.2723	30.2858	40	40	40	40
186	NM_009868.3	370529	Mm03053719_s1	Cdh5	40	40	40	40	40	40	40	40	40	40	40	40	40	40	40	40	40	40	40	40	40	40	40	40	40	40	40	40	40	40	40	40	40	40	40	40
187	NM_017479.2	367789	Mm03053249_g1	Myst4	26.8731	26.9406	26.6698	26.816	26.8869	26.4962	26.9962	26.6112	27.9696	27.8715	26.4699	26.5802	26.8426	26.9029	27.0067	27.0443	28.8697	28.9613	26.506	26.6396	26.7825	26.6171	27.3157	27.2862	29.9626	29.8935	29.382	29.6281	27.4656	27.3094	26.9849	26.9584	27.3911	27.234	27.0004	27.1884
188	NM_010021.3	919107	Mm03053726_s1	Dazl	25.8282	25.883	25.1376	24.9846	25.6972	25.4293	25.625	25.2081	26.1037	26.0632	26.5455	26.3217	40	40	33.6171	33.7766	40	40	35.2121	34.886	33.8234	33.2689	40	38.3718	40	40	33.8625	33.4539	32.7919	32.4237	40	40	34.9307	35.0533	36.9274	35.9388
189	NM_019643.3	902931	Mm03053254_g1	Tera	29.334	29.7505	29.1396	28.9821	28.5707	28.2586	29.5428	29.0359	28.3452	28.5428	28.3819	28.442	33.2981	32.9565	30.5625	30.3076	31.744	31.862	33.4609	34.0208	31.0904	31.1154	30.4745	30.408	36.9255	36.803	29.0227	28.9354	31.2686	31.3754	30.1447	29.9273	32.8098	33.2104	32.3149	32.4543
190	NM_010136.2	584143	Mm03053730_s1	Eomes	40	40	40	40	39.1284	38.1833	40	40	40	40	33.6736	33.2935	40	40	40	40	40	40	40	40	40	40	40	40	40	40	40	40	40	40	40	40	40	40	40	40
191	NM_019703.3	592921	Mm03053257_s1	Pfkp	40	40	40	40	40	40	40	40	40	40	40	40	40	40	40	40	40	40	40	40	40	40	40	40	40	40	40	40	40	40	40	40	40	40	40	40
192	NM_010197.3	931772	Mm03053735_s1	Fgf1	28.3934	27.9922	29.4875	29.3721	30.1223	29.5546	29.4759	28.7115	28.8903	28.6351	30.4768	29.5927	27.4558	27.2255	27.4261	27.2413	30.2122	29.9214	30.3681	30.2341	40	40	34.9382	32.8352	40	35.883	35.9278	35.3215	40	36.838	29.1963	28.8994	37.2432	35.4942	35.192	33.9389
193	NM_030743.5	916633	Mm00459526_m1	Zfp313	25.7171	25.9108	26.272	26.2442	26.0299	25.6905	26.4455	26.4862	26.5343	26.8187	26.6199	26.4893	26.4415	26.1201	27.1519	27.0777	27.2815	27.5034	27.4493	27.5558	29.0619	29.3402	28.0439	27.9923	29.3387	29.2736	28.0835	28.1877	27.8531	28.037	29.2048	29.1532	27.6569	27.845	27.1493	27.2059
194	NM_153403.1	826249	Mm01188513_g1	Eif2c1	40	40	40	40	31.0572	31.1959	40	40	34.5958	34.6536	40	37.1252	40	40	40	40	40	40	34.8748	36.1903	40	40	40	40	40	40	40	40	40	40	40	40	40	40	40	40
195	NM_153057.3	566447	Mm00461919_m1	Nomo1	31.678	31.9441	31.7419	31.4856	29.6485	29.4694	34.1561	34.2342	29.8365	29.4192	29.3631	29.6528	34.0685	33.4661	31.861	31.8641	37.3417	37.5342	29.6978	29.9454	28.3061	28.3286	36.486	35.7309	40	40	29.3263	29.4179	33.7795	34.834	28.8819	28.8745	27.8429	27.9943	29.6888	29.8412
196	NM_153177.2	764257	Mm01188521_m1	Eif2c4	40	40	40	40	40	40	40	40	40	40	40	40	40	40	40	40	40	40	40	40	40	40	33.2861	34.6022	40	40	40	40	40	40	40	40	33.5998	33.4264	40	40
197	NM_027288.2	834569	Mm00466166_m1	Manba	31.6825	31.8187	31.8093	32.176	31.6979	31.5243	33.3852	33.2199	32.7338	31.847	34.4916	34.5498	40	40	40	40	40	40	40	40	40	40	40	40	40	40	40	40	40	40	40	40	40	40	40	40
198	NM_153402.1	526537	Mm01188534_m1	Eif2c3	28.1478	28.1741	28.3636	28.5735	27.6601	27.3961	28.0526	28.3081	29.1272	28.8999	30.5956	30.4453	36.4053	36.3856	28.8412	28.8238	27.9358	27.9454	28.8774	29.0781	29.8113	30.03	38.2016	40	40	40	29.7166	29.8329	29.6017	29.7925	27.9725	27.8358	40	40	28.9124	29.0676
199	NM_028198.2	681631	Mm00466329_g1	Xpo5	31.1419	31.416	32.9758	33.71	30.8921	30.3165	29.6359	29.9026	30.687	30.5739	33.6152	33.2443	40	40	40	40	36.5193	35.8338	29.491	29.6307	28.6388	28.6513	29.5014	29.5388	40	40	28.2962	28.2925	37.4987	37.186	30.3375	30.379	29.0856	29.3465	32.3472	32.8935
200	NM_009332.2	481965	Mm01188714_m1	Tcf3	40	40	40	40	32.3771	32.2558	40	40	40	40	40	40	40	40	40	40	40	40	28.0108	27.9005	40	40	40	40	40	40	40	40	40	40	40	40	40	40	40	40
201	NM_007971.1	839537	Mm00468464_m1	Ezh2	23.4215	23.6517	23.2981	23.3	23.6047	23.26	23.4584	23.5179	23.361	23.2576	23.5552	23.6342	26.1786	25.7023	25.7571	25.6789	25.3787	25.4462	25.2335	25.2317	26.3885	26.2719	25.6234	25.8144	27.0684	27.2264	25.4341	25.3373	26.6006	27.042	26.8068	26.6643	26.6178	26.9898	26.7974	26.9114
202	NM_009540.3	556205	Mm01189723_s1	Zfa	40	40	40	40	40	40	40	40	40	40	40	40	40	40	40	40	40	40	40	40	40	40	40	40	40	40	40	40	40	40	40	40	40	40	40	40
203	NM_010135.2	528146	Mm00468749_g1	Enah	27.3148	27.5015	26.8672	26.8268	27.412	27.1643	27.2741	27.2796	27.3962	27.3606	27.2234	27.1665	26.8936	26.2965	26.2803	26.3302	25.2958	25.3368	25.4014	25.4227	26.2156	26.3012	25.037	25.166	28.199	28.2645	24.9007	24.8883	25.5996	25.9476	25.3679	25.5032	26.3359	26.5076	26.23	26.2987
204	NM_008822.1	658932	Mm01192828_m1	Pex7	28.8447	28.8484	28.3859	28.0535	28.8808	28.5611	30.2197	30.5182	30.0423	29.6638	29.2477	29.2637	40	36.7621	40	40	40	40	40	40	40	40	30.8048	30.746	40	40	38.8658	36.4068	30.3905	30.6171	31.4689	31.323	32.0803	32.6513	31.385	31.6489
205	NM_019572.2	549469	Mm00469527_m1	Hdac7a	40	40	40	40	40	40	40	40	40	34.4667	40	40	40	40	40	40	40	40	40	40	40	40	40	40	40	40	40	40	40	40	40	40	40	40	40	40
206	NM_018780.2	717215	Mm01194236_m1	Sfrp5	40	40	40	40	40	40	40	40	40	40	40	40	40	40	40	40	40	40	40	40	40	40	40	40	40	40	40	40	40	40	40	40	40	40	40	40
207	NM_021876.2	342268	Mm00469660_m1	Eed	25.2656	25.3886	24.782	24.8316	25.6024	24.9303	25.5296	25.1156	25.6615	25.8465	25.518	25.457	28.5138	27.926	28.1656	28.381	29.3962	29.3926	30.2339	30.4902	30.6685	30.5948	28.9761	29.0246	30.9193	31.1634	28.4607	28.3295	28.1824	28.2477	28.6492	28.7644	28.5396	28.7092	30.6597	30.782
208	NM_001024699.1	531375	Mm01199956_m1	Zbtb45	29.254	29.2937	28.6109	28.4245	29.7542	29.5477	29.1987	29.1314	28.4795	28.4633	40	40	36.0933	36.4422	40	40	32.6453	32.436	36.8115	40	31.904	32.0815	31.68	31.8408	30.8413	30.7586	29.9518	30.1177	31.4517	31.5714	33.2617	32.9354	31.1363	30.9071	36.5638	36.5589
209	NM_023653.4	848390	Mm00470018_m1	Wnt2	40	40	40	40	40	40	39.6316	40	40	40	40	40	40	40	40	40	40	40	40	40	40	40	40	40	40	40	40	40	40	40	40	40	40	40	40	40
210	NM_028064.2	327034	Mm01200945_g1	Slc39a4	29.8807	29.7582	32.3272	32.1414	29.0864	28.8676	29.1675	29.3091	29.3097	29.5297	26.8506	26.8972	22.7215	22.6217	23.04	22.9451	23.1663	23.1562	22.9783	22.919	26.3627	26.1895	22.9771	22.998	26.2922	26.2895	24.7997	24.869	24.0826	24.1123	22.8557	22.9143	23.2836	23.1934	23.6786	23.5893
211	NM_026479.4	930927	Mm00471424_m1	Zcchc10	27.5013	27.5641	25.9674	26.0096	26.3144	26.1842	26.6387	26.2365	26.4757	26.6234	25.8375	25.7278	34.0137	33.8929	30.7605	31.1693	30.7211	31.0942	30.5647	30.5587	31.3775	31.4875	32.3388	32.5364	29.2103	29.4095	29.6615	29.7174	28.7183	28.8077	28.2339	28.3668	28.1318	28.1833	28.5547	28.3545
212	XM_284144.5	660977	Mm01206511_s1	Fzd9	30.8971	30.9422	40	40	31.3907	30.4344	40	40	31.459	31.5025	31.366	31.3973	32.3056	32.1061	40	40	29.7064	29.8799	28.2691	28.2658	37.2816	37.7373	30.0176	29.8513	32.3819	32.8618	33.0749	32.9372	30.3988	30.1299	29.2111	29.3394	31.4928	31.4527	35.5169	35.8757
213	NM_026594.2	913930	Mm00471658_m1	Rpl39l	26.1391	26.2255	25.704	25.7831	25.9669	25.6798	25.877	25.6918	25.1382	25.0605	24.849	25.1171	24.7185	24.5638	23.4423	23.5536	24.2045	24.2005	23.0974	23.0053	24.3166	24.3811	23.8645	24.0312	25.8872	25.936	24.7456	24.7913	24.6382	24.5078	23.0436	23.0789	24.7067	24.6093	25.2793	25.3009
214	NM_175284.3	299990	Mm01206689_s1	Fzd10	40	40	40	40	40	40	40	40	40	40	40	40	40	40	40	40	40	40	40	40	40	40	40	40	40	40	40	40	40	40	40	40	40	40	40	40
215	NM_027397.3	631404	Mm00471926_m1	Isl2	35.3551	35.5513	40	40	40	40	40	40	40	40	40	40	40	40	40	40	40	40	40	40	40	40	40	40	40	40	40	40	40	40	40	40	40	40	40	40
216	NM_133256.2	577456	Mm01211547_s1	Gsx2	40	40	40	40	40	40	40	40	40	40	40	40	40	40	40	40	40	40	40	40	40	40	40	40	40	40	40	40	40	40	40	40	40	40	40	40
217	NM_019827.5	564783	Mm03053261_s1	Gsk3b	30.6747	30.7636	32.1774	32.4147	32.8022	32.2578	31.0906	30.4353	29.8216	29.81	30.8215	31.2461	40	40	29.4616	29.2662	40	40	33.6808	33.6696	37.8934	40	40	40	40	38.8365	40	40	34.5153	40	30.9077	31.771	40	37.1558	31.7768	31.8286
218	NM_010202.4	798951	Mm03053741_s1	Fgf4	37.481	40	37.7013	40	31.4322	31.6251	30.2484	29.7654	27.982	28.0238	29.3578	29.4484	25.4867	25.9437	27.0035	27.274	25.9311	26.1234	26.9305	26.7505	34.4295	35.4692	26.6457	26.5478	32.0583	32.2339	30.9128	30.7877	25.5318	25.8122	25.428	26.0115	26.8461	26.6681	24.8505	24.7481
219	NM_019971.2	690619	Mm03053266_s1	Pdgfc	40	40	32.8294	33.4094	40	40	37.5454	36.386	40	40	40	40	40	40	40	40	40	40	40	40	40	40	40	40	40	40	40	40	40	40	40	40	40	40	40	40
220	NM_010203.4	783155	Mm03053745_s1	Fgf5	40	40	40	40	40	40	40	40	40	40	40	40	40	40	40	40	40	40	40	40	40	40	40	40	40	40	40	40	40	40	40	40	35.3167	34.5184	38.3463	38.8278
221	NM_020005.3	758640	Mm03053271_g1	Pcaf	40	40	40	40	40	40	40	40	40	40	33.5218	33.4001	32.1621	31.9977	31.788	31.8153	36.9892	37.3771	31.7222	31.6426	34.7394	33.8866	33.6058	32.6188	34.3094	34.1974	31.6375	32.0695	32.2371	33.2064	33.2891	33.156	35.3571	34.0879	38.5224	36.592
222	NM_010206.2	814680	Mm03053750_s1	Fgfr1	40	40	40	40	40	40	35.6555	36.0008	40	40	40	40	40	40	40	40	40	40	40	40	40	40	40	40	40	40	40	40	40	40	40	40	40	40	40	40
223	NM_021099.2	922274	Mm03053277_s1	Kit	26.7519	27.0611	27.4115	27.4424	27.3231	27.1312	27.4455	27.0688	26.828	26.8964	27.5219	27.8256	29.4381	29.2676	32.0414	31.9604	33.7081	33.7061	30.217	30.1256	29.7249	29.6297	29.5045	29.8106	32.1944	31.7963	30.3769	30.4349	32.5388	32.9312	28.9193	29.6429	29.9718	29.8207	30.3004	30.5586
224	NM_010207.2	490232	Mm03053754_s1	Fgfr2	30.2813	30.4267	34.759	35.0575	33.8217	32.9459	33.3601	32.3388	40	40	40	40	32.0135	31.4885	30.157	30.0664	30.7283	30.5941	30.7315	30.676	29.2386	29.0541	32.7796	32.644	40	40	40	37.6611	29.3884	29.6198	29.0005	29.2366	40	40	31.4432	31.372
225	NM_021284.4	757835	Mm03053281_s1	Kras	28.1489	28.3572	28.8807	28.9225	28.4039	27.8527	28.7031	27.607	27.798	27.7708	27.9657	28.0555	30.2267	30.4948	30.8513	30.9871	30.7384	30.7931	30.8134	30.9538	40	40	40	40	40	40	40	40	30.5029	30.9105	40	40	32.1117	32.0958	36.4256	36.5711
226	NM_010264.3	610783	Mm03053759_s1	Nr6a1	24.6763	24.7683	25.1151	25.0281	24.5289	24.4716	25.123	25.0444	25.0644	24.9294	25.1098	25.0375	25.0949	25.1672	25.6464	25.5023	25.8112	25.6363	25.9147	25.8585	28.6164	28.4053	25.8857	25.7169	28.8513	28.7471	26.4753	26.4769	25.1261	25.3673	24.9913	25.2686	25.5028	25.4582	25.3963	25.3826
227	NM_001083927.1	524213	Mm03053286_s1	Tle3	40	36.5983	40	40	30.9916	30.6781	40	37.4854	40	40	30.3037	30.2804	40	35.8357	40	40	29.1684	29.4846	32.7768	32.2028	29.9089	29.7462	40	36.8978	32.2856	33.0153	40	37.0136	32.5861	33.1943	27.3179	27.8331	34.0967	33.3376	28.9278	29.3242
228	NM_010296.2	600728	Mm03053764_s1	Gli1	37.7133	38.5056	40	40	40	40	40	40	40	40	40	40	40	40	39.0629	40	36.8653	36.3502	40	40	40	40	40	40	40	40	38.1009	37.1891	40	40	40	40	37.7726	37.1418	40	40
229	NM_007395.3	383986	Mm03053291_s1	Acvr1b	30.9372	31.7364	31.4647	31.3938	30.3206	30.382	32.078	31.4154	28.7568	28.7466	37.362	35.1138	40	40	40	40	40	40	40	40	40	40	30.1492	30.0538	40	40	40	40	40	40	32.4211	33.1851	40	40	40	40
230	NM_010789.2	871702	Mm03053770_s1	Meis1	40	40	40	40	40	40	40	40	40	40	40	40	40	40	40	40	40	40	40	40	40	40	40	40	40	40	40	40	40	40	40	40	40	40	40	40
231	NM_007496.2	751684	Mm03053295_s1	Zfhx3	40	40	40	40	40	40	40	40	40	40	40	40	40	40	40	40	40	40	40	40	40	40	40	40	40	40	40	40	40	40	40	40	40	40	40	40
232	NM_010900.2	405951	Mm03053778_s1	Nfatc2ip	29.422	29.2459	30.6532	30.5566	29.6942	29.4047	29.8615	29.4413	29.3124	28.7885	28.2304	28.1537	30.7352	29.9987	31.8408	31.4049	30.0503	29.9913	29.7074	29.4528	30.4085	30.4524	34.9196	34.8339	38.2753	36.1535	29.8234	30.0658	29.5488	29.7635	29.6045	29.418	31.3874	31.3671	33.6471	32.924
233	NM_007537.1	722246	Mm03053297_s1	Bcl2l2	33.6438	34.3579	31.943	32.4411	31.8402	31.4543	34.8006	33.843	30.7403	30.7452	30.2259	30.2616	34.8504	34.3034	32.5426	32.6492	34.1325	34.658	32.3709	32.5283	33.765	34.1452	33.988	34.2041	36.633	36.7669	34.1935	33.7454	40	40	32.0804	31.9492	34.9995	35.5437	35.95	39.0864
234	NM_010928.2	703703	Mm03053783_s1	Notch2	34.3395	33.3207	37.7064	38.7971	33.3122	33.3922	37.3762	35.9529	40	40	35.974	36.3147	40	40	38.172	40	33.6525	33.3819	32.3511	32.2994	33.992	33.5054	40	40	37.5399	40	40	40	40	40	40	40	36.5769	35.2765	40	40
235	NM_007548.2	627661	Mm03053303_s1	Prdm1	32.0378	32.2334	31.0112	31.3935	31.0535	30.6303	30.4157	30.3729	35.336	35.366	30.526	30.4621	40	40	32.5472	32.5637	40	40	40	40	40	40	40	40	40	40	40	40	40	40	40	40	40	40	40	40
236	NM_010937.2	762079	Mm03053787_s1	Nras	28.4557	28.4359	28.8319	28.482	28.647	27.8812	29.3999	28.4428	28.3673	28.0451	28.2261	28.0629	40	40	34.7191	34.4197	37.4851	37.4113	32.044	32.2957	33.5688	32.351	40	40	40	40	35.4898	35.4699	32.9094	32.8573	30.4534	30.4386	32.9584	32.5349	32.5714	32.0221
237	NM_007552.4	730122	Mm03053308_g1	Bmi1	23.4751	23.6221	23.711	23.6414	23.5802	22.9404	23.9355	23.747	23.9087	23.8441	23.7421	23.7326	25.915	25.498	25.6177	25.5317	25.6385	25.5058	26.1762	26.3252	27.4177	27.1681	25.7272	25.7081	27.0783	27.3244	25.8223	25.9856	24.984	25.2745	25.0693	25.0645	25.5604	25.4994	26.8167	26.8635
238	NM_011023.3	331401	Mm03053792_s1	Otx1	34.3237	33.6493	32.1151	31.8135	33.9594	33.9781	34.567	34.1852	37.3111	36.8938	40	40	40	40	40	40	40	40	40	40	40	40	40	40	40	40	40	40	40	40	40	40	40	40	40	40
239	NM_007560.3	686479	Mm03053312_s1	Bmpr1b	28.4125	28.4193	28.9895	29.1679	28.7669	28.8969	29.5693	29.4393	29.0188	29.2241	28.439	28.2519	33.891	33.2156	30.9234	30.7903	40	40	40	40	37.6087	38.7646	40	40	40	40	40	40	31.041	30.5794	32.4269	31.7765	38.0597	37.4952	36.461	36.9455
240	NM_011039.2	586824	Mm03053796_s1	Pax7	40	40	40	40	40	40	40	40	40	40	40	40	40	40	40	40	40	40	40	40	40	40	40	40	40	40	40	40	40	40	40	40	40	40	40	40
241	NM_008284.1	671177	Mm00476174_m1	Hras1	26.9185	26.8913	28.5163	28.433	27.8753	27.8037	27.9117	27.9247	27.0392	26.9176	25.7631	25.9167	26.1345	26.1632	25.253	25.3171	26.8999	26.9484	24.7616	24.8841	25.6951	25.7085	26.2522	26.2267	25.7344	25.6476	26.3735	26.3096	25.8856	25.8909	26.7356	26.7505	26.1822	26.188	25.3502	25.381
242	NM_007673.3	480933	Mm01212280_m1	Cdx2	40	40	40	40	40	40	40	40	40	40	40	40	40	40	40	40	40	40	40	40	40	40	40	40	40	39.0469	40	40	40	40	40	40	40	40	40	40
243	NM_008815.2	681607	Mm00476696_m1	Etv4	40	40	40	37.4837	35.6747	34.8156	34.4484	34.299	40	40	40	40	40	40	40	40	40	40	40	40	40	40	40	40	40	40	40	40	40	40	40	40	40	40	40	40
244	NM_009144.1	920743	Mm01213947_m1	Sfrp2	40	40	40	40	40	40	40	40	40	40	40	40	40	40	40	40	40	40	40	40	40	40	40	40	40	40	40	40	40	40	40	40	40	40	40	40
245	NM_008818.2	535766	Mm00476718_m1	Rhox5	40	40	40	40	40	40	40	40	30.5167	30.0604	32.874	32.6222	40	40	32.7827	32.9131	40	40	40	40	40	40	27.4575	27.5788	40	40	37.2265	37.1051	40	40	40	40	40	40	40	40
246	NM_011037.3	832690	Mm01217939_m1	Pax2	35.0664	35.0727	31.9315	32.6294	33.0533	33.0574	40	40	35.8489	35.1591	35.1894	35.8084	40	40	40	40	40	40	40	40	40	40	40	40	40	40	40	40	33.8318	33.1931	40	40	40	40	40	40
247	NM_011871.2	646544	Mm00478737_m1	Prkra	40	40	40	40	40	40	37.5755	36.3966	40	40	40	40	40	40	40	40	40	40	40	40	40	40	40	40	40	40	40	40	40	40	40	40	40	40	29.7354	29.5307
248	NM_001081001.1	761489	Mm01218747_m1	Brca2	26.4826	26.5678	26.4806	26.5974	26.3493	25.893	26.5625	26.4488	26.6963	26.6829	26.2385	26.2144	30.0068	29.9645	29.2272	29.5328	27.9659	27.9938	29.4664	29.4906	28.2451	28.1668	28.9634	29.0604	29.253	29.2333	27.5944	27.5839	28.0163	27.994	27.057	27.2487	26.4492	26.3329	29.8936	29.7886
249	NM_011876.3	576936	Mm00478747_m1	Twf2	28.7132	28.1366	27.7199	27.9558	29.4055	28.9463	29.4088	29.1755	29.915	29.9633	29.434	29.4661	40	40	32.5657	32.9188	33.3248	33.7915	38.08	40	29.3975	29.3437	28.9075	28.9596	30.708	30.919	30.2983	30.4005	31.9119	31.5141	33.776	34.1771	28.9142	28.837	30.3462	30.5752
250	NM_027382.3	420291	Mm01224977_m1	Hdac8	31.1716	30.7517	38.8747	38.4067	40	40	32.7271	32.7438	30.1267	30.0807	40	40	40	40	40	40	40	40	40	40	40	40	40	40	40	40	36.3085	37.0672	40	40	40	40	40	40	40	40
251	NM_019695.2	303727	Mm00480004_m1	Pard6a	31.2043	30.6362	40	40	40	40	40	36.5998	30.2277	30.4876	40	36.1902	40	40	40	40	40	40	40	40	40	40	40	40	40	40	40	40	40	40	40	40	40	40	40	40
252	NM_009950.2	652882	Mm01226172_m1	Cradd	40	40	40	40	40	40	40	40	40	40	40	40	40	40	40	40	40	40	40	40	40	40	40	40	40	40	40	40	40	40	40	40	40	40	29.4043	29.3821
253	NM_007666.3	439365	Mm00483230_m1	Cdh6	40	40	40	40	40	40	40	40	40	40	40	40	40	40	40	40	40	40	40	40	40	40	40	40	40	40	40	40	40	40	40	40	40	40	40	40
254	NM_008513.2	925137	Mm01227476_m1	Lrp5	32.4554	31.6922	28.8282	28.6636	29.2658	28.9222	32.1673	31.778	30.9565	31.0787	29.1153	28.8927	35.5677	35.6399	36.5988	35.1837	40	40	40	38.5714	33.2539	33.6533	31.2166	30.9016	40	38.4586	35.8962	36.3412	33.5611	35.1008	40	40	40	37.38	35.3604	35.2598
255	NM_007685.2	569692	Mm00483277_m1	Cfc1	34.4125	34.3569	40	40	40	40	40	40	40	40	40	40	40	40	40	40	40	40	40	40	40	40	40	40	40	40	40	40	40	40	40	40	40	40	40	40
256	NM_009372.2	912288	Mm01227699_m1	Tgif1	40	40	36.0896	34.4412	29.6062	29.5213	32.0229	32.0021	40	40	30.9621	31.3172	40	40	33.2491	32.7984	28.8601	28.9749	40	40	29.4082	29.3972	31.0294	31.1518	30.762	30.5248	32.2012	31.9639	32.6148	33.2253	40	40	30.8665	30.6303	28.8378	28.9378
257	NM_008539.3	620558	Mm00484723_m1	Smad1	27.7399	27.5116	27.3057	27.3754	28.5396	28.2464	29.1252	29.0593	29.4124	29.5687	27.2138	27.2894	40	40	40	40	40	40	40	40	40	40	40	40	40	40	40	40	40	40	40	40	30.2597	30.1735	33.9653	34.8553
258	NM_008452.1	507591	Mm01244979_g1	Klf2	40	40	40	40	33.3715	33.0015	40	40	40	40	40	40	26.9377	27	26.3697	26.4178	25.658	25.6017	24.818	24.9307	23.9778	23.9673	23.6667	23.6229	26.5697	26.5927	24.1772	24.1733	27.1256	27.1484	24.8712	24.8867	24.2133	24.1497	25.5122	25.6485
259	NM_008543.1	437292	Mm00484742_m1	Smad7	40	40	40	40	40	40	40	40	40	40	40	40	40	40	35.5772	36.7105	33.3859	33.4935	40	39.893	40	40	38.0588	36.7627	39.0658	40	40	40	40	40	40	40	40	40	40	40
260	NM_001032378.1	511508	Mm01246167_m1	Pecam1	32.0819	32.2602	30.037	29.9722	31.9524	31.6578	32.9508	32.4901	40	40	40	40	40	40	40	40	31.0149	30.7911	31.4336	31.3936	29.318	29.2997	30.15	30.0752	30.9248	31.0656	29.9784	30.1676	32.0295	31.9665	40	40	30.9471	30.9146	40	40
261	NM_008558.1	333804	Mm00484802_g1	Max	27.4244	27.4974	26.9472	26.8808	27.3134	27.2474	26.9742	26.6933	27.8163	27.8375	28.1732	28.2815	27.5236	27.1122	30.1541	30.1394	28.1368	28.0515	28.3776	28.5017	28.1863	28.0204	33.4339	33.3254	31.7539	31.706	28.0956	28.0807	29.1228	29.1747	29.6116	29.5704	28.8078	28.7992	28.9607	29.0084
262	NM_026116.2	773976	Mm01249575_m1	Bbs2	28.4663	28.5351	28.2092	28.2573	28.7246	28.8052	27.9932	27.8343	27.2056	27.1336	26.5734	26.5827	25.8093	25.7951	25.2145	25.2927	25.2047	25.2461	25.156	25.2116	26.0339	26.1052	24.8749	24.8316	27.5081	27.4538	25.3447	25.3476	27.4168	27.4957	25.6693	25.7806	27.28	27.3512	26.3547	26.5353
263	NM_009233.2	803274	Mm00486299_s1	Sox1	40	40	40	40	40	40	40	40	40	40	40	40	40	40	40	40	40	40	40	40	40	40	40	40	40	40	40	40	40	40	40	40	40	40	40	40
264	XM_915467.2		Mm01250173_m1	LOC634286	37.7237	36.4708	40	40	40	40	31.2969	31.7572	40	37.0007	40	40	40	40	40	40	40	40	29.4716	29.7894	31.6666	31.3105	40	40	40	40	30.651	30.8732	28.6157	28.7252	33.9472	34.266	32.7676	33.1764	30.7777	30.7256
265	NM_007632.2	352483	Mm03053314_g1	Ccnd3	27.803	27.6747	28.2616	28.199	27.8733	27.3897	28.2461	27.7971	28.3127	28.2132	27.9872	28.0968	28.9473	29.112	29.2353	28.981	30.8093	30.9615	27.3418	27.1677	28.5037	28.5264	28.828	28.9086	29.2503	29.0461	27.7831	27.7623	28.3269	28.1843	28.151	28.0511	29.687	29.8395	29.0583	29.1397
266	NM_011356.4	729890	Mm03053801_s1	Frzb	40	40	40	40	40	40	40	40	40	40	40	40	40	40	40	40	40	40	37.4126	36.0715	40	40	40	40	40	40	40	40	40	40	40	40	40	40	40	40
267	NM_007659.3	679490	Mm03053317_s1	Cdc2a	40	39.0766	40	40	34.7735	34.7747	40	40	37.6357	35.5558	40	40	40	40	40	40	40	40	40	40	40	40	40	40	40	40	40	40	40	40	40	40	40	40	40	40
268	NM_011401.3	499837	Mm03053806_s1	Slc2a3	31.8851	31.8699	34.2476	33.698	33.2729	32.9758	33.7112	32.6414	31.4963	31.3734	31.5066	31.3026	31.3686	31.141	33.7784	33.9654	36.071	35.4394	33.1761	32.9642	33.6186	33.5558	31.9766	31.7045	32.5046	32.2563	35.1895	35.3516	31.8495	31.6449	32.295	32.2978	34.1922	33.9387	34.8023	34.3621
269	NM_022721.3	622288	Mm03053323_s1	Fzd5	35.1749	35.2819	33.5989	33.8814	35.5643	35.2744	33.3227	32.6257	39.7522	40	33.3032	33.7876	39.2071	38.1213	40	40	38.0069	40	31.9639	32.0406	40	40	40	40	40	40	40	40	40	40	32.4356	32.4101	38.0416	37.362	40	40
270	NM_011443.3	848340	Mm03053810_s1	Sox2	26.0392	26.1783	31.7669	32.4338	28.0594	27.9604	29.6203	29.365	27.6357	27.518	26.5379	26.5405	40	40	40	40	40	40	40	40	40	40	40	40	40	40	40	40	40	40	40	40	40	37.9408	40	40
271	NM_022724.3	585827	Mm03053326_s1	Suv39h2	27.8739	28.1144	28.3122	28.309	29.2722	28.5899	30.1436	29.4772	28.3192	28.4612	28.0559	28.0439	40	40	35.5387	40	40	40	40	40	40	40	32.4624	32.6124	40	40	40	38.1246	37.5598	38.6162	40	40	31.4469	31.5716	33.9616	33.9331
272	NM_011488.2	342000	Mm03053818_s1	Stat5a	26.7907	26.8067	27.3231	27.2084	26.4543	26.3212	27.8752	27.8179	27.6851	27.5718	27.9414	27.6822	26.9732	26.9445	28.6965	28.5662	26.861	26.8737	29.6248	29.7798	40	40	40	36.4986	40	36.2307	27.5681	27.5063	29.8521	29.785	27.2388	27.2674	29.459	29.3591	26.9719	26.7094
273	NM_023371.3	427213	Mm03053328_s1	Pin1	40	40	40	40	40	40	40	40	34.8677	36.7099	30.634	30.3946	40	40	40	40	40	40	40	40	40	40	40	40	40	40	40	40	40	40	40	40	40	40	40	40
274	NM_011489.2	491384	Mm03053822_s1	Stat5b	40	40	40	40	40	40	40	40	40	40	40	40	40	40	40	40	40	40	40	40	40	40	40	40	40	40	40	40	40	40	40	40	40	40	40	40
275	NM_023403.2	393216	Mm03053331_s1	Mesdc2	40	40	40	40	40	40	40	40	40	40	40	40	40	40	40	40	40	40	40	40	40	40	40	40	40	40	40	40	32.5994	31.9973	40	40	40	40	36.4367	37.7594
276	NM_011514.1	460610	Mm03053827_s1	Suv39h1	33.5661	34.2768	40	40	32.1399	31.5899	33.4901	32.7439	30.3235	30.2318	30.2158	30.1382	29.2406	29.1004	35.0602	34.6777	31.2635	31.3742	32.8062	32.876	29.9733	29.83	30.6379	30.5985	40	40	40	40	28.9322	28.7733	27.9343	28.2048	31.8519	31.6011	30.4815	30.3852
277	NM_023598.2	447240	Mm03053335_s1	Arid5b	40	40	40	40	40	40	40	40	40	40	40	40	40	40	40	40	40	40	40	40	40	40	40	40	40	40	40	40	40	40	40	40	40	40	40	40
278	NM_011535.2	886901	Mm03053831_s1	Tbx3	29.9907	30.2332	29.7019	29.7239	31.6164	31.3808	32.4763	31.5275	28.9669	28.7842	31.0063	30.6734	40	40	40	40	40	40	40	40	38.3381	38.416	40	40	40	40	40	40	30.6965	30.5005	28.1394	28.2041	32.5853	32.5826	31.2839	31.2976
279	NM_023635.4	341276	Mm03053338_s1	Rab27a	40	40	38.0911	38.5189	40	40	40	40	34.0076	33.9949	34.9248	35.0012	36.6558	37.5403	39.7426	40	34.7166	35.9941	36.1761	36.5029	40	30.6427	38.1556	37.6178	40	40	40	40	33.4644	33.1966	37.9415	36.8751	38.6307	38.7814	40	40
280	NM_011578.2	564160	Mm03053837_s1	Tgfbr3	27.1207	26.6892	26.8125	26.7435	27.6877	27.3711	27.4399	27.0388	26.395	26.4072	26.8116	26.7803	32.0946	31.6734	29.7041	29.5838	40	40	30.3099	29.9399	40	40	40	40	40	40	40	40	29.8826	29.7888	34.0352	34.6469	30.1126	29.7867	30.2952	30.1836
281	NM_023755.2	482552	Mm03053343_s1	Tcfcp2l1	40	40	31.4723	31.2309	40	40	40	40	40	40	40	40	29.3313	29.4343	32.2229	31.6945	40	40	40	40	40	40	40	40	40	40	40	40	40	40	40	40	40	40	40	40
282	NM_011768.2	470307	Mm03053842_s1	Zfx	40	40	40	40	40	40	40	40	36.2056	36.3633	39.0447	40	40	40	40	40	32.454	32.3794	32.3974	31.8404	40	40	32.6643	32.4517	31.4883	31.2951	34.3921	34.3378	40	40	32.5407	31.9562	31.482	31.1818	40	40
283	NM_024124.2	544606	Mm03053347_s1	Hdac9	27.5796	27.5062	27.1469	27.1571	27.6831	27.6866	28.348	28.1362	32.7564	32.5929	29.7149	29.8081	40	40	40	40	40	40	40	40	40	38.1559	40	40	40	40	40	40	40	39.7109	33.5798	32.8366	40	40	39.6458	40
284	NM_011780.2	620628	Mm03053847_s1	Adam23	40	40	40	40	40	40	40	40	40	40	40	40	40	40	40	40	40	40	40	40	40	40	40	40	40	40	40	40	40	40	40	40	40	40	40	40
285	NM_028060.2	697037	Mm03053358_s1	Slc35f2	30.9862	31.2899	30.7695	30.7108	31.6346	31.1909	37.9076	40	28.8863	28.9134	30.0765	29.7535	29.897	29.7801	30.2506	30.0105	30.2737	30.4084	29.1922	29.1116	30.9364	30.8863	28.3145	28.3676	31.1863	30.866	27.9078	27.8562	29.4541	29.5045	29.8001	29.5998	30.0243	29.9747	31.1096	30.978
286	NM_011934.3	614256	Mm03053853_s1	Esrrb	29.2383	29.0001	29.692	28.6061	28.8009	28.8782	29.7916	29.4678	27.3097	26.9631	28.4395	28.3101	27.5614	27.284	27.6871	27.5574	26.9257	26.9083	26.7841	26.838	27.4045	27.1265	26.3323	26.3047	27.8996	27.8238	26.3765	26.2463	28.0445	28.1211	26.7627	26.6405	26.5447	26.4503	27.301	27.0687
287	NM_028149.1	331560	Mm03053363_s1	Fbxl20	40	40	40	40	40	40	40	40	40	40	40	40	40	40	38.0155	38.8986	40	40	40	40	40	40	40	40	40	40	40	40	38.0328	40	35.6798	35.8638	36.8886	36.7647	40	40
288	NM_013672.2	862729	Mm03053855_g1	Sp1	26.5235	26.5309	26.9533	26.8558	26.6272	26.7521	26.8226	26.4648	31.9457	32.4967	27.7774	27.7299	26.9599	26.7639	28.307	28.1271	29.2966	29.3335	27.7757	27.7932	27.8581	27.4801	26.7885	26.5371	28.0806	27.931	26.6579	26.768	28.7842	28.7549	27.0587	27.0694	26.2965	25.8636	27.9717	27.9092
289	NM_009238.2	637227	Mm00486320_s1	Sox4	31.1265	30.8587	30.1263	30.1088	30.9004	30.4533	31.0968	31.0661	29.6887	29.5002	30.6085	30.8508	37.7962	38.5041	40	40	35.8588	35.8748	27.1672	27.3228	32.0882	32.2566	29.9912	30.2656	35.882	36.6634	29.5746	29.6537	37.4368	40	29.6755	29.6252	32.6262	32.4178	40	40
290	NM_020510.2	351212	Mm01250498_s1	Fzd2	40	40	40	40	40	40	40	40	40	40	40	40	40	40	40	40	40	40	40	40	40	40	40	40	40	40	40	40	40	40	40	40	40	40	40	40
291	NM_009867.1	805041	Mm00486932_m1	Cdh4	32.6718	31.8548	29.6885	29.8377	28.5345	28.2292	28.4996	28.5215	29.6012	29.432	29.4963	29.3416	28.7271	28.7204	40	40	37.4355	40	40	40	40	40	40	40	40	40	40	40	40	40	40	40	40	40	40	40
292	NM_001007567.1	493721	Mm01250636_m1	Slc7a6os	26.8514	26.6009	27.5682	27.3885	26.0358	25.971	27.1987	27.1658	26.7191	26.5791	26.1286	26.1265	26.4254	26.3903	26.3936	26.5159	27.1585	27.0924	26.7875	26.879	26.9991	26.9723	26.3367	26.3146	29.8544	29.9779	26.2393	26.217	26.8445	26.7976	25.959	25.7347	26.525	26.4035	27.3077	27.2567
293	NM_010830.1	347051	Mm00487769_g1	Msh6	26.2503	25.821	26.5695	26.3978	26.62	26.2011	27.37	27.437	26.7518	26.2984	26.6428	26.6455	26.6159	26.5463	26.7721	26.8687	27.7707	27.4825	26.0867	26.0787	28.0877	28.0183	25.9536	25.9937	28.7064	28.8203	27.1841	27.3148	27.9278	28.0355	26.8679	26.7511	26.6171	26.2041	27.7369	27.8947
294	NM_007561.3	604793	Mm01254942_m1	Bmpr2	29.127	28.8628	28.9407	29.0338	27.8677	27.9449	29.0827	29.073	27.9791	27.5715	29.341	29.403	29.6739	29.3475	30.2365	30.2816	34.9058	34.2396	33.5222	33.5313	30.0111	30.0712	30.2029	30.4726	40	38.9018	28.9871	28.7994	33.1529	33.912	28.8223	28.6565	35.4295	35.4207	34.2243	33.7631
295	NM_010849.4	819312	Mm00487804_m1	Myc	40	40	31.2537	31.5366	32.3625	32.2475	32.479	32.6468	40	40	31.5497	32.0951	32.0189	31.5671	30.4203	30.2488	35.1214	34.5657	30.463	30.1178	29.1319	28.8666	28.1765	28.3379	40	40	29.2024	28.9932	29.1205	29.5332	31.799	31.7598	29.3979	28.9753	27.7784	27.9951
296	NM_008057.2	541386	Mm01255614_s1	Fzd7	30.0871	30.1398	34.5992	36.2691	29.6214	29.2396	30.9862	30.8813	30.0012	29.4021	29.0139	29.31	30.9444	30.7767	36.4056	37.8246	31.4641	31.3107	31.1952	31.0848	37.7264	40	40	40	40	40	40	40	31.2043	31.085	40	40	32.3819	32.3254	37.3078	36.5633
297	NM_013595.2	484343	Mm00488962_g1	Mbd3	27.5496	27.4075	26.395	26.4043	27.5391	27.4243	27.0776	27.0911	28.7306	28.5224	27.0048	27.1791	26.6421	26.3432	26.4823	26.5867	27.083	26.9184	26.2541	26.365	26.5346	26.5974	26.1149	26.0642	26.7973	26.9244	26.4975	26.5243	27.5381	27.551	26.7591	26.591	26.666	26.409	28.0348	28.1087
298	NM_011487.3	929855	Mm01257238_g1	Stat4	29.0231	28.4883	27.8539	27.8281	28.6651	28.3562	28.8775	28.8891	28.0529	27.8197	28.1584	28.2058	40	40	40	40	40	40	31.1942	31.075	38.4732	38.2927	40	40	40	40	32.1839	32.3783	29.6666	29.979	28.1017	27.7896	28.4199	28.0355	30.1159	30.0343
299	NM_016742.4	417152	Mm00489601_m1	Cdc37	30.621	30.6153	29.1381	29.3782	31.2684	30.981	30.8658	30.7476	31.6892	31.6324	29.0244	29.1017	28.6951	28.3513	28.3943	28.594	29.3433	29.3653	29.171	29.2407	28.6283	28.6812	29.3616	29.3016	30.2596	30.131	29.2285	29.2922	28.6574	28.7645	28.0634	27.8156	27.5228	27.3088	30.6213	30.6935
300	NM_025778.3	559233	Mm01261010_m1	Bcl2l14	30.3479	29.8982	36.322	35.3603	32.6887	31.89	29.9742	29.6643	30.5854	30.6138	31.1924	31.1361	28.4697	28.3659	28.257	28.2086	27.9332	27.6654	27.1033	27.0378	27.0784	27.2426	25.8144	25.9662	28.2674	28.2041	25.6909	25.8308	28.5475	29.0539	27.2815	27.1502	28.0251	27.918	28.4542	28.3926
301	NM_021390.2	433592	Mm00491266_m1	Sall1	40	40	40	40	40	40	40	40	40	40	40	40	31.9795	32.062	40	40	40	40	40	40	40	40	40	40	40	40	40	40	40	40	40	40	40	40	40	40
302	NM_008540.2	376286	Mm01262405_m1	Smad4	29.4512	29.2754	29.0427	29.0591	30.0164	29.8185	29.4323	29.6102	29.0354	28.8202	31.3591	31.5919	26.107	25.9675	26.8151	26.7845	27.0245	26.8918	26.5688	26.0379	30.7445	30.7654	27.0208	27.0698	28.6443	28.8295	26.3366	26.3485	27.7316	27.8515	38.4872	36.0478	28.3722	28.2654	27.5393	27.5038
303	NM_025656.3	414755	Mm00491823_m1	Sip1	40	40	40	40	30.6131	30.4971	30.784	30.9486	40	40	30.7484	30.9824	24.9846	24.9892	26.2433	26.4079	26.9403	26.7171	25.3051	25.3986	25.3692	25.2917	25.5076	25.6911	27.1566	27.0884	25.4128	25.3712	25.8695	25.9908	26.146	26.0466	25.1061	24.9732	26.3744	26.4025
304	NM_144787.1	690014	Mm01263760_m1	Jmjd2c	30.8176	30.5846	30.4447	30.7128	32.758	32.6391	31.0951	30.6751	29.9808	29.838	29.6794	29.8063	31.4779	30.9979	32.8315	32.6366	40	37.1572	32.9545	32.7927	40	40	31.3366	31.3773	40	40	31.4833	31.1536	31.4364	31.5122	40	40	32.3706	31.8796	38.0463	37.5886
305	NM_008321.1	363450	Mm00492575_m1	Id3	30.6953	30.4048	40	40	40	40	28.7273	28.6679	40	40	40	40	31.7483	31.4993	40	40	29.8128	29.9469	40	40	28.7124	28.5435	33.603	33.1975	40	40	36.626	35.0195	34.6439	35.4088	40	40	37.2938	36.5038	27.4156	27.3518
306	NM_015798.3	840287	Mm01265526_m1	Fbxo15	23.505	23.508	24.093	24.1548	23.8838	23.7516	23.8017	23.6896	24.1128	24.2625	24.516	24.4998	22.9978	22.915	22.7715	22.9947	22.891	22.9186	22.894	22.9259	21.5394	21.4907	20.5104	20.564	23.3468	23.4049	21.7071	21.6988	22.2244	22.2496	21.1933	21.2348	21.5332	21.3762	23.1705	23.1546
307	NM_009319.1	898939	Mm00493421_m1	Tarbp2	31.7473	31.6746	33.9485	34.0715	31.9658	32.0864	30.2578	30.0623	31.906	31.8182	30.7015	30.984	29.2338	29.5573	29.287	29.34	40	38.7338	34.0558	33.6354	29.9942	30.0768	29.5501	29.4693	31.3481	31.5025	33.8804	33.4951	30.6722	30.9613	29.3384	29.0941	29.0121	29.0246	29.4655	29.4484
308	NM_019800.3	737780	Mm01265712_m1	Acp6	27.3718	27.4866	26.4614	26.4789	26.9103	26.734	27.3385	27.2408	27.2427	27.0937	27.4981	27.3312	32.7542	32.8658	29.3372	29.2396	40	40	29.3948	29.7472	40	40	28.1619	28.2554	40	40	36.3558	37.5599	30.3382	30.4728	28.384	28.4865	27.4728	27.4585	33.7119	33.7763
309	NM_009328.2	857076	Mm00493442_m1	Tcf15	30.7202	30.6301	36.106	34.9792	40	40	29.5857	29.5551	28.177	28.4224	40	35.6774	30.5544	30.4702	36.3922	35.4787	27.5003	27.2465	27.3158	27.2243	40	40	40	36.3546	27.6266	27.6581	40	40	40	40	32.8044	32.2337	28.9968	28.9481	28.0211	27.9839
310	NM_001081139.1	312031	Mm01265729_g1	Ankrd35	34.8815	34.322	30.6372	30.3084	32.8015	32.4777	32.5984	31.8086	28.6747	28.5632	29.2048	28.8708	31.8349	31.2215	29.6589	29.408	29.8222	29.778	28.7654	28.8573	28.766	28.9058	29.9603	29.9712	31.3872	31.0227	29.9554	29.9195	30.6008	30.5067	30.1578	30.13	31.7367	31.809	29.3694	29.4247
311	NM_009351.2	507782	Mm00493599_g1	Tep1	32.8718	32.483	30.544	30.6435	40	40	30.2563	30.7527	28.6347	28.6843	29.2733	29.3999	32.608	32.5222	27.6223	27.6551	27.2587	27.1573	27.9812	28.261	28.2754	28.1492	28.0956	27.9939	34.3089	34.3054	29.9278	29.8161	28.3394	28.5504	26.5191	26.616	28.2687	28.4164	28.2829	28.3349
312	NM_011050.3	496317	Mm01266062_m1	Pdcd4	31.6728	32.053	29.0708	28.965	29.8021	29.8041	29.2665	29.1574	29.9252	29.4855	30.7431	30.6828	40	40	40	40	40	40	33.8808	34.6414	40	40	40	40	40	40	40	40	31.6362	32.0642	40	40	40	40	40	40
313	NM_028602.2	598084	Mm03053368_s1	Tex19	26.9524	26.9052	27.0633	26.944	26.5136	26.2523	27.3852	27.0555	26.4824	26.471	26.8132	26.8799	25.8138	26.0269	26.2945	26.2895	26.3289	26.4086	25.6425	25.69	27.9628	27.5638	27.2617	27.1987	28.4375	27.5654	27.1533	27.1944	27.1916	27.2315	26.4012	26.3322	27.0317	26.9521	29.3167	29.2036
314	NM_013685.2	597793	Mm03053860_s1	Tcf4	40	40	40	40	40	40	40	40	40	40	40	40	40	40	40	40	40	40	40	40	40	40	40	40	40	40	40	40	40	40	40	40	40	40	40	40
315	NM_028615.1	885126	Mm03053371_g1	Dppa2	28.1686	28.1972	27.6233	27.8136	27.6615	27.2351	27.977	27.5763	26.9837	26.8498	26.9786	26.9058	26.0351	25.885	25.4031	25.3019	25.0519	25.2394	25.4426	25.4613	24.7376	24.7068	24.4025	24.4245	27.2201	27.0803	24.6918	24.6645	24.3895	24.5548	23.2382	23.2343	24.4403	24.3299	25.2998	25.2528
316	NM_013692.2	932625	Mm03053865_s1	Klf10	28.2401	28.074	31.6809	31.5512	27.7492	27.5302	28.9769	28.5776	27.7954	27.6541	28.0452	27.9331	29.9838	30.255	31.1409	31.1522	32.2752	32.1852	30.6935	30.5332	40	40	40	40	34.5476	33.943	31.3534	31.3069	40	40	34.2447	34.1123	36.723	34.7332	34.2733	34.9007
317	NM_028838.2	777350	Mm03053374_s1	Lrrc2	40	40	40	40	40	40	40	40	40	40	40	40	40	40	40	40	40	40	33.8739	34.0011	40	40	32.8953	32.3085	32.9376	32.6095	36.0458	35.8287	31.6438	31.2598	40	40	34.4638	34.2674	36.9009	36.5323
318	NM_013729.2	359339	Mm03053870_g1	Mixl1	40	40	40	40	31.2984	30.8185	40	40	40	40	40	40	40	40	40	40	34.5669	34.3351	40	40	40	40	33.0192	32.8568	40	40	37.6072	36.8882	31.5153	31.13	30.0912	30.3914	35.3303	35.9952	31.0477	30.5655
319	NM_030706.1	753186	Mm03053379_s1	Trim2	40	40	40	40	33.3752	32.4037	40	40	40	40	40	40	40	40	40	40	40	40	31.9694	32.2888	40	40	40	40	40	40	40	40	40	40	40	40	40	40	40	40
320	NM_013822.4	299270	Mm03053874_s1	Jag1	26.4705	26.3307	26.6645	26.5119	26.8624	26.5057	27.5051	26.7928	26.3636	26.124	26.8354	26.7177	40	40	40	40	40	40	36.2555	35.6537	35.7198	36.7096	35.3225	37.6507	40	40	32.3786	32.3272	40	40	30.5873	30.2732	31.1307	31.195	33.8158	35.3829
321	NM_133754.4	510229	Mm03053384_s1	Fblim1	31.6419	31.3066	40	40	29.4643	29.1036	36.9363	35.1978	31.9285	31.8949	34.9298	33.6432	29.0744	28.8298	27.6082	27.7538	28.7946	28.7123	27.3855	27.4197	28.9339	28.8473	28.6587	28.6838	36.7074	36.9782	27.9499	27.9556	28.2342	28.1823	28.1134	28.0094	27.7487	27.8733	28.7205	28.5951
322	NM_013827.2	335578	Mm03053879_s1	Mtf2	32.7685	32.7788	33.3422	32.7496	32.3913	32.3862	37.674	37.5981	31.3203	31.3776	31.5495	31.445	27.7385	27.6766	28.9186	28.9564	29.9186	29.7028	30.4321	30.222	29.4718	29.209	29.9597	30.0868	29.5423	29.5596	27.8651	27.8978	30.0914	30.1324	28.0997	27.9771	29.5035	29.2872	29.7575	29.4927
323	NM_139051.3	496916	Mm03053390_s1	Nr5a1	40	40	40	40	30.649	30.4294	40	40	40	40	40	40	40	40	40	40	40	40	40	40	40	40	40	40	40	40	40	40	40	40	40	40	40	40	40	40
324	NM_013834.2	681589	Mm03053883_s1	Sfrp1	40	40	40	40	40	40	40	36.8378	35.001	33.996	38.4703	40	33.3736	33.2539	34.5497	33.9359	40	40	40	40	40	40	38.3676	40	33.5201	33.8002	31.003	30.8264	37.6228	36.2769	40	40	40	40	34.1029	33.7265
325	NM_144841.2	908792	Mm03053395_s1	Otx2	40	40	40	40	40	40	40	40	40	40	40	40	40	40	40	40	40	40	40	40	40	40	40	40	40	40	40	40	40	40	40	40	40	40	40	40
326	NM_015733.4	401897	Mm03053887_s1	Casp9	28.2253	28.0001	36.5763	34.5515	30.4328	30.4112	30.331	30.3732	29.2757	28.8296	28.7776	28.7643	37.2407	40	30.7174	30.407	40	40	28.054	27.9891	40	40	40	40	40	40	31.8435	31.6582	40	40	40	40	40	40	31.6906	31.6553
327	NM_144919.2	866303	Mm03053400_s1	Hdac11	35.3481	40	40	40	40	40	40	40	40	40	40	40	40	40	40	40	40	40	40	40	40	40	40	40	40	40	40	40	40	40	40	40	40	40	40	40
328	NM_007631.2	684806	Mm03053889_s1	Ccnd1	32.2235	32.4265	33.5088	33.1573	40	40	37.4014	38.5421	40	40	33.9934	33.3891	40	40	40	40	40	40	40	40	34.9975	34.3476	31.8305	31.539	40	40	40	40	36.2559	36.2059	40	40	40	40	36.8827	34.8557
329	NM_145441.3	535687	Mm03053401_s1	Ubxd4	31.3377	31.4432	31.6412	31.4895	30.2973	29.5856	31.0309	29.7031	31.4414	31.5055	30.9439	30.9241	30.1539	29.7562	30.7117	30.7367	31.2552	31.2742	30.318	30.4135	30.9867	30.8151	31.127	31.156	31.6634	31.1595	29.4298	29.2961	30.502	30.3835	29.7751	29.8142	30.7919	30.608	32.4754	32.4043
330	NM_008010.3	517437	Mm03053890_s1	Fgfr3	34.5669	33.6469	32.1298	32.3695	35.7664	37.7708	40	40	40	40	40	40	40	40	34.8512	35.1815	29.1551	28.7324	40	40	40	40	40	40	40	40	27.9372	27.7955	30.0856	30.1597	30.2287	29.9442	31.6255	31.9325	32.6714	32.5745
331	NM_148948.2	830467	Mm03053406_s1	Dicer1	27.0249	27.0967	27.4484	27.5408	26.6878	26.4753	26.733	26.4549	26.6296	26.5569	27.1175	26.9254	29.6287	29.2288	28.4485	28.5523	40	40	29.873	29.8617	32.2961	32.1212	40	40	40	40	40	40	36.4058	34.4998	30.8033	30.7385	30.4904	30.2516	30.6718	30.4373
332	NM_009327.2	752686	Mm03053891_s1	Hnf1a	40	40	40	40	40	40	40	40	40	40	40	40	32.6131	32.7024	40	40	40	40	33.9149	33.584	40	40	39.0972	40	40	40	40	40	40	40	40	40	40	40	40	40
333	NM_152895.1	313644	Mm03053411_s1	Jarid1b	30.3152	30.3091	29.6178	29.51	29.1246	29.1654	29.5564	29.3479	30.1492	29.9946	28.5383	28.5455	30.3003	30.0896	30.5761	30.4823	30.9702	31.0347	29.5998	29.8518	31.6534	31.2906	30.4801	30.4089	40	40	30.392	30.347	29.6569	29.628	28.0947	28.0436	29.1645	29.1903	31.5255	31.3098
334	NM_033324.2	861411	Mm03053892_s1	Dgcr8	31.1564	31.3573	33.6548	33.6034	31.2444	31.3695	33.0492	32.3887	31.3792	30.92	31.4557	31.3389	31.9484	31.6873	34.2848	33.05	33.355	33.7221	33.8856	33.2151	34.6716	34.2007	35.8703	36.2849	35.4119	34.9181	38.679	36.6392	34.063	33.3656	35.5549	33.7481	36.9061	37.3445	40	37.4255
335	NM_153178.2	445690	Mm03053414_g1	Eif2c2	29.0046	29.0707	28.8932	28.7167	28.2435	27.9321	28.2228	28.3228	26.9436	26.8858	27.1709	27.1566	25.4695	25.3588	25.2193	25.3271	26.2759	26.1991	25.589	25.8958	27.0688	27.0895	25.6716	25.6611	28.3385	28.2286	26.6223	26.7467	27.8246	27.8232	25.9614	25.9699	26.8496	26.688	26.8906	26.9688
336	NM_172301.3	579171	Mm03053893_gH	Ccnb1	22.5681	22.4166	21.9326	21.8391	21.7545	21.9749	21.9166	21.8245	22.9207	22.6847	22.5777	22.3565	23.1092	23.2369	23.4182	23.4207	24.2898	24.2299	24.0232	23.9506	23.9516	23.9066	23.567	23.45	25.6268	25.3008	23.067	22.9067	23.8681	23.874	23.7418	23.5922	23.2449	22.9406	24.9517	24.9688
337	NM_010262.3	915507	Mm00494578_m1	Gbx2	26.9562	26.9132	26.5875	26.7271	25.9698	25.8609	26.3049	26.1302	26.2621	26.3328	26.9413	27.0312	33.4378	32.9734	28.9311	29.2004	33.7137	34.1515	29.7319	29.808	40	40	40	40	40	40	40	40	28.5649	28.5509	40	40	40	40	30.7016	30.8134
338	NM_007633.2	466841	Mm01266311_m1	Ccne1	28.431	28.4487	30.5696	30.7317	28.5048	28.381	30.489	29.9869	28.0519	28.1445	27.869	27.8548	29.8884	30.3119	30.784	30.7109	31.0413	31.1348	30.4441	30.5231	31.8653	31.6214	31.0909	31.0713	32.234	32.0646	30.3398	30.1616	31.7339	31.6933	29.9719	29.9584	30.3528	30.063	33.5152	33.6094
339	NM_010630.2	532222	Mm00495166_g1	Kifc2	40	40	40	40	40	40	35.8537	40	40	40	40	40	29.8161	29.6403	30.9364	31.2178	35.1549	35.673	40	40	32.9674	33.5271	40	35.7173	35.3038	36.0185	28.2096	28.3441	29.2503	29.2768	40	40	40	37.0757	40	40
340	NM_183248.2	478797	Mm01278279_m1	Nkx6-2	40	40	40	40	40	40	40	40	40	40	40	40	40	40	40	40	40	40	29.6417	29.1956	38.5554	40	40	40	40	40	40	40	40	40	40	40	40	40	40	40
341	NM_031166.2	436885	Mm00499701_m1	Id4	40	40	40	40	29.3276	28.8876	30.4556	30.6432	32.3426	31.6333	27.1935	27.3152	40	40	27.7205	28.0438	29.0198	29.2826	27.3279	27.2504	27.8637	27.9901	35.9931	35.8558	40	40	40	40	30.5891	30.3595	30.8489	31.0009	40	40	40	40
342	NM_030676.1	813137	Mm01285339_g1	Nr5a2	26.796	26.8713	27.1573	27.2812	27.9707	27.8931	26.7171	26.5589	26.3084	26.2487	26.5501	26.6213	25.8198	25.7091	26.3092	26.3823	26.4334	26.5125	26.2394	26.2921	25.3957	25.3111	23.6679	23.738	26.7439	26.6403	24.6883	24.7513	25.0698	24.9719	24.9131	24.7446	25.1848	25.1918	26.0721	26.1697
343	NM_054048.3	696811	Mm00499756_m1	Rcor2	40	40	40	40	30.5452	30.1843	36.1486	37.5688	40	40	32.154	32.0887	40	36.321	40	40	30.1991	30.2447	36.6122	37.3128	40	40	40	40	31.4273	32.0044	37.4816	40	31.1359	31.9438	40	40	40	40	40	40
344	NM_008006.1	387108	Mm01285715_m1	Fgf2	40	40	40	40	40	40	40	40	40	40	40	40	40	40	40	40	40	40	40	40	40	40	40	40	40	40	40	40	40	40	40	40	40	40	40	40
345	NM_007515.2	785382	Mm00500264_g1	Slc7a3	40	40	40	40	40	40	40	40	40	40	40	40	40	40	40	40	40	40	40	40	40	40	31.2273	31.1408	40	40	40	40	40	40	40	40	40	40	40	40
346	NM_178247.2	919936	Mm01286002_m1	Dppa1	30.4617	30.8826	28.8104	28.7801	30.3935	30.1692	29.073	28.7532	29.2879	29.4882	31.6257	31.4341	40	40	40	40	33.4727	33.471	40	40	40	40	35.0342	34.3129	40	40	40	40	40	40	40	40	40	40	40	40
347	NM_008679.2	432940	Mm00500783_g1	Ncoa3	25.7002	25.6881	25.6358	25.6843	25.725	25.3605	26.3638	26.2282	25.9156	25.9028	25.5323	25.6319	26.5028	26.2537	25.288	25.2398	26.1804	26.0822	26.8305	26.9206	25.5185	25.5076	25.2943	25.2351	28.6262	28.5889	25.4486	25.4288	25.766	25.8661	25.5051	25.4522	24.7916	24.7769	25.9095	25.9489
348	NM_029570.3	618099	Mm01292414_m1	Atp11b	27.9414	28.1573	28.7586	28.7702	28.6382	28.4936	28.7347	28.4955	27.6897	27.699	28.1281	28.2187	29.671	29.5267	31.6288	31.4639	34.8357	35.4901	37.1614	36.6336	30.4197	30.3325	28.5447	28.5188	40	40	40	37.9814	40	40	30.485	30.2507	30.0039	30.2638	29.4127	29.3738
349	NM_011600.2	906851	Mm00502265_s1	Tle4	40	40	40	40	40	40	40	40	40	40	37.6621	40	30.9852	30.8631	40	40	30.1527	30.0939	30.6045	30.7634	40	38.068	28.7333	28.8297	31.7049	31.9078	31.8763	31.8255	30.4771	30.4309	29.2811	29.4007	29.7889	29.7693	29.4985	29.4965
350	NM_007628.2	833560	Mm01292554_m1	Ccna1	40	40	40	40	40	40	40	40	36.157	36.281	40	40	40	40	40	40	40	40	40	40	40	40	40	40	40	40	40	40	40	40	40	40	40	40	40	40
351	NM_133765.2	932131	Mm00505350_m1	Fbxo31	29.0841	29.2053	30.1588	30.0312	32.8685	33.1275	28.893	29.0035	29.128	29.1492	28.8722	28.9104	25.6654	25.6289	24.4459	24.4141	25.5669	25.7527	24.5012	24.6052	24.8366	24.8791	24.3314	24.4572	26.1116	26.0201	25.9779	26.0451	24.2146	24.2077	24.7098	24.788	25.1887	25.1412	25.3909	25.3899
352	NM_007957.2	924691	Mm01297208_m1	Esx1	40	40	40	40	40	38.1165	34.1221	35.0375	33.9371	34.6005	36.012	34.9821	40	40	40	40	40	40	40	40	40	40	40	40	40	40	40	40	40	40	40	40	37.9379	38.1525	40	40
353	NM_027547.2	839547	Mm00510567_m1	Prdm5	40	40	40	40	40	40	32.9534	32.3315	30.8905	30.6804	40	40	40	40	40	40	40	40	30.9794	30.5701	40	40	40	40	40	40	40	40	40	40	40	40	40	40	40	40
354	NM_207225.1	759578	Mm01299557_m1	Hdac4	40	40	40	40	34.1364	34.5981	32.0226	32.1202	30.4345	30.3826	31.7578	31.875	29.1109	29.3636	40	37.6597	36.9122	36.1238	36.3899	40	29.7304	29.7892	35.1813	35.647	40	40	37.618	40	40	40	40	40	33.6546	33.5881	40	37.103
355	NM_144547.1	560784	Mm00513847_m1	Amhr2	31.1505	31.1816	36.4832	34.8443	36.4246	34.8976	30.0148	30.0518	28.9474	29.064	28.0095	28.1052	24.7545	24.7995	25.2554	25.2809	25.7099	25.6571	24.421	24.4214	26.392	26.4893	25.0538	25.2218	27.1986	27.1406	25.2275	25.2545	25.5991	25.5886	25.2864	25.3483	24.8282	24.828	25.6703	25.7497
356	NM_021279.4	563722	Mm01300555_g1	Wnt1	40	40	40	40	40	40	40	40	40	40	40	40	40	40	40	40	40	40	40	40	40	40	40	40	40	40	40	40	40	40	40	40	40	40	40	40
357	NM_008229.2	335030	Mm00515117_m1	Hdac2	25.6829	25.7709	25.5587	25.5422	25.1901	24.8764	24.9319	25.0033	25.0262	25.1498	24.9615	25.0858	26.7875	26.6998	26.429	26.4863	27.5222	27.8456	26.759	26.7851	25.587	25.7293	26.7041	26.7253	28.1334	28.1765	26.9106	27.0466	27.5381	27.5071	26.9313	27.1792	27.6751	27.4655	28.9836	28.8719
358	NM_013866.2	753916	Mm01305866_g1	Zfp385	31.5282	31.5002	30.8764	31.0176	28.275	28.3541	30.0885	30.1894	32.6843	32.4424	40	40	40	40	40	40	40	40	29.1794	29.2599	40	40	40	40	40	40	40	40	40	40	40	40	40	40	40	40
359	NM_008266.4	427869	Mm00515118_g1	Hoxb1	40	40	40	40	40	40	36.7718	36.6514	40	40	40	40	40	40	40	40	40	40	40	40	40	40	40	40	40	40	40	40	40	40	40	40	40	40	40	40
360	NM_199198.1	468172	Mm01308118_g1	Hdac10	40	40	40	40	40	40	40	40	40	40	40	40	27.8375	27.8477	40	40	40	40	40	40	40	40	27.521	27.4423	40	40	29.6843	29.7553	33.115	32.6088	40	40	29.0062	28.9194	40	40
361	NM_007872.4	806324	Mm03053419_s1	Dnmt3a	35.71	35.6912	33.1816	32.8733	32.2115	32.0295	32.5674	32.2388	31.72	31.7571	40	40	40	40	40	40	40	40	40	40	40	40	40	40	40	40	40	40	40	40	40	40	40	40	40	40
362	NM_153096.2	379981	Mm03053894_g1	Zfp353	31.9726	32.1146	35.3101	34.936	29.7856	29.9257	31.9643	31.9454	36.5802	36.2306	36.1881	35.5468	40	40	40	40	40	40	40	40	40	40	40	40	40	40	40	40	40	40	40	40	40	40	40	40
363	NM_172668.2	605932	Mm03053424_s1	Lrp4	40	36.6051	38.584	40	33.2563	33.533	40	40	34.1209	33.8363	34.4995	34.0217	40	40	40	40	40	40	34.6175	33.6967	40	40	40	40	40	40	40	40	40	40	40	40	37.5009	36.8978	40	40
364	NM_007430.4	611721	Mm03053914_s1	Nr0b1	40	40	40	40	40	40	40	40	40	40	40	40	40	40	40	40	40	40	40	40	40	40	40	40	40	40	40	40	40	40	40	40	40	40	40	40
365	NM_175090.3	466910	Mm03053427_s1	Slc31a1	28.8856	28.9519	29.4366	29.5698	29.3248	29.4431	31.5129	31.4285	30.3183	30.2062	29.8354	29.8398	40	40	30.9635	31.0321	40	40	32.3342	32.3586	40	40	40	40	40	40	40	40	32.381	32.7103	29.6026	29.5031	31.3568	31.5899	31.0857	31.2478
366	NM_010919.2	371284	Mm03053915_s1	Nkx2-2	40	40	40	40	40	40	40	40	40	40	40	40	40	40	40	40	40	40	40	40	40	40	40	40	40	40	40	40	40	40	40	40	40	40	40	40
367	NM_175238.5	916031	Mm03053432_s1	Rif1	28.6109	28.4843	28.9244	28.7934	28.1347	27.7566	28.5627	28.4452	27.2675	27.2433	27.4969	27.5683	28.8076	29.0384	29.4097	29.3769	30.0695	30.1449	29.1219	28.9596	32.2259	32.4323	29.7044	29.7664	30.9352	31.2669	31.6861	31.787	29.9707	29.795	29.4256	29.4884	30.7095	30.5748	32.9144	32.5428
368	NM_013633.2	615439	Mm03053917_g1	Pou5f1	31.9146	31.5231	30.8512	30.1626	29.4986	29.4795	30.0813	29.8334	29.9214	29.91	31.2364	30.9571	30.9705	31.4877	30.3396	30.1395	29.5688	29.5388	29.3511	29.0322	34.5233	34.2162	29.55	29.0756	31.3934	31.265	30.7949	30.7199	30.4813	30.2698	31.8318	31.6563	29.8966	29.9248	32.8471	32.5756
369	NM_176996.3	742542	Mm03053436_g1	Smo	40	40	40	40	40	40	40	40	40	40	40	40	40	40	40	40	40	40	27.6765	27.3818	40	40	40	36.9923	40	40	34.3066	34.6198	32.664	32.9444	40	40	36.1411	35.8445	40	40
370	NM_181548.2	868267	Mm03053919_s1	Eras	31.3899	31.3534	31.412	31.4756	30.772	30.7807	31.9544	32.0054	31.2837	31.1354	31.1871	31.1977	40	40	35.1538	35.1115	40	40	35.8751	35.7258	40	40	40	40	40	40	40	40	40	40	40	40	40	40	37.6873	37.0558
371	NM_177099.3	577531	Mm03053439_g1	Lefty2	40	40	40	40	40	40	40	40	40	40	40	40	40	40	40	40	40	40	40	40	40	40	40	40	40	40	40	40	40	40	40	40	40	40	40	40
372	NM_026820.2	307562	Mm03053920_gH	Ifitm1	29.9191	29.798	30.086	29.6663	40	40	30.3223	29.4948	31.4265	31.4749	30.3232	30.8909	34.766	34.6124	28.0996	27.9247	26.7533	26.5516	26.5168	26.2843	27.8612	27.6423	33.7255	33.2146	28.3131	28.1679	33.738	33.9647	26.872	26.6539	27.4186	27.2439	27.6981	27.3745	30.2111	30.3094
373	NM_178703.3	308836	Mm03053445_s1	Slc6a1	40	40	40	40	40	40	40	40	40	40	40	40	40	40	40	40	40	40	40	40	40	40	40	40	40	40	40	40	40	40	40	40	40	40	40	40
374	NM_026301.2	838309	Mm03053934_g1	Rnf125	33.7429	33.6382	33.9364	34.4302	31.5512	30.8049	40	40	40	38.9237	32.186	32.0133	28.5738	28.4586	30.7096	30.5314	32.8037	32.8368	30.7238	30.6169	31.5089	31.37	31.3066	31.0288	30.5275	30.011	30.3781	30.0337	29.474	29.3968	28.6862	28.6261	29.8054	29.5923	30.7221	30.1835
375	NM_178729.3	385340	Mm03053450_s1	Fbxl5	40	40	40	40	40	40	40	40	40	40	40	40	40	40	40	40	40	40	40	40	40	40	40	40	40	40	40	40	40	40	40	40	40	40	40	40
376	NM_026505.2	930640	Mm03053974_s1	Bambi	40	40	40	40	40	40	40	40	40	40	40	40	40	40	40	40	40	40	40	40	40	40	40	40	40	40	40	40	40	40	40	40	40	40	40	40
377	NM_181585.5	454060	Mm03053455_s1	Pik3r3	29.6796	29.7763	30.1073	30.0283	29.0186	28.8395	30.0031	30.6755	29.6609	29.6483	29.9691	29.8333	31.622	32.0899	32.38	32.4487	30.6617	30.5063	31.3184	31.2881	31.4296	31.3699	33.391	33.072	40	40	38.7905	40	31.3465	31.232	31.8704	32.0517	31.6764	31.5081	34.1771	34.0969
378	NM_009556.3	916512	Mm03053975_g1	Zfp42	33.0886	32.5486	30.2562	29.9712	30.9107	31.1233	32.1934	32.1319	29.1269	28.9832	28.9825	29.2141	28.3251	28.4231	28.2427	28.227	28.7174	28.5968	28.8542	28.6102	35.6938	36.04	28.353	28.2516	40	40	27.8642	27.7199	28.8774	28.8398	26.7992	26.6333	28.9757	28.6356	29.9962	29.911
379	NM_183208.2	798615	Mm03053460_s1	Zmiz1	28.2345	28.1064	28.4708	28.4385	27.7507	27.7281	28.9001	28.906	28.8275	28.572	29.5532	29.6605	27.5678	27.6175	29.3294	29.3634	29.3544	29.2454	40	40	40	35.4564	28.4954	28.484	29.7451	29.8156	27.8784	27.7769	28.1857	28.141	28.8249	28.9572	27.4975	27.3034	29.6481	29.4814
380	NM_008084.2	892972	Mm99999915_g1	Gapdh	25.8925	25.6904	25.6068	25.4884	25.2852	25.2899	25.2207	25.1239	25.6084	25.5902	25.6343	25.4625	25.7766	26.2597	25.2895	25.1453	25.5706	25.2841	25.3349	25.18	26.1396	26.0286	26.4089	26.2799	28.2443	28.1731	26.5735	26.4187	27.1907	27.1436	32.278	32.3804	27.0821	26.892	28.1077	27.6585
381	NM_009697.3	924002	Mm03053465_s1	Nr2f2	40	40	40	40	40	40	40	40	40	40	40	40	40	40	40	40	40	40	40	40	40	40	40	40	40	40	40	40	40	40	40	40	40	40	40	40
382	18s		18S-Hs99999901_s1	18s	27.0221	26.824	27.0364	26.9935	24.5615	24.8686	26.7301	26.9187	24.8698	24.6526	27.1077	26.9452	25.2727	25.3825	27.4208	26.8642	26.6645	26.2011	27.694	27.4762	29.075	28.724	27.5267	27.3756	27.7134	27.4607	26.6344	26.3939	26.7934	26.7294	27.8021	27.9484	29.3693	28.7416	29.3186	28.948
383	NM_198023.2	827277	Mm03053471_s1	Rcor1	31.1197	30.8968	29.8204	29.5834	29.3576	29.54	29.9224	29.9235	30.8288	30.8249	31.1513	30.7707	30.7904	30.806	28.9691	28.898	29.7243	29.5569	30.8739	30.827	30.6589	30.4744	30.2734	30.2144	30.9929	31.0643	30.7354	30.669	30.8925	30.5065	33.4233	33.603	29.8842	29.8709	30.7003	30.7153
384	18s		18S-Hs99999901_s1	18s	26.8456	26.7145	26.7666	26.6577	24.4598	24.6923	26.3625	26.6587	24.6534	24.2988	26.5925	26.5191	24.854	25.4314	27.1927	26.931	26.6231	26.4489	27.8785	27.1902	28.8434	28.7288	27.654	27.2244	27.5707	26.8266	26.4921	26.1286	26.7321	26.3656	27.6692	27.624	29.073	28.7247	29.3124	28.9288
