# Supplementary material for: Deterministic and Stochastic Allele Specific Gene Expression in Single Mouse Blastomeres
Source: PLoS One. 2011 Jun 23;6(6):e21208. doi: 10.1371/journal.pone.0021208 (PMC3121735; doi:10.1371/journal.pone.0021208)
Supplement: Table S7 — Allelic specific real-time PCR validation of ASE based on single cell RNA-Seq data. The averaged Ct values and standard deviations (SD) were calculated from three technical repeats. (XLS) [file pone.0021208.s007.xls]

## Sheet: raw Ct values
assay ID	Chromosome	SNP location	first_allele (reference)	second_allele (alternative)	geneName	samples	Ct_1 first alelle	Ct_2 first alelle	Ct_3 first alelle	Ct_1 second alelle	Ct_2 second alelle	Ct_3 second alelle	first alelle Avg_Ct	first alelle Stdev	second alelle Avg_Ct	second alelle Stdev
assay_1	chr3	51055315	T	C	Ccrn4l	2-cell-E1-B1	18.3067	18.7351	18.778	17.8724	18.4555	18.2512	18.6066	0.260589	18.193	0.295862
assay_2	chr4	143383670	A	T	Gm13023	2-cell-E1-B1	17.0731	16.8421	16.9896	15.975	15.6324	15.4817	16.9683	0.116944	15.6964	0.252781
assay_3	chr4	143400029	A	G	Gm13084	2-cell-E1-B1	15.9051	15.8265	16.2005	15.3283	15.1092	15.5395	15.9774	0.197196	15.3257	0.215186
assay_4	chr4	143383681	C	T	Gm13023	2-cell-E1-B1	16.5623	16.7398	16.7257	16.4315	21.1257	16.4612	16.6759	0.0986725	18.0061	2.70169
assay_5	chr9	78159952	A	G	Omt2a	2-cell-E1-B1	12.549	12.2078	11.8523	11.2142	12.1181	11.7325	12.203	0.348336	11.6883	0.453567
assay_6	chr13	65288811	A	G	Nlrp4f	2-cell-E1-B1	14.5693	15.3942	15.1869	16.4708	16.5194	16.3005	15.0502	0.429124	16.4302	0.114938
assay_7	chr9	50927971	C	G	no gene	2-cell-E1-B1	11.7387	12.0006	12.1503	20.4478	20.728	20.8983	11.9632	0.208343	20.6914	0.227487
assay_1	chr3	51055315	T	C	Ccrn4l	2-cell-E1-B2	18.2994	18.0198	18.0346	17.9771	17.7362	45	18.1179	0.157325	26.9044	15.6717
assay_2	chr4	143383670	A	T	Gm13023	2-cell-E1-B2	16.9888	16.9937	17.0521	15.2429	15.9848	15.8201	17.0115	0.0352148	15.6826	0.389618
assay_3	chr4	143400029	A	G	Gm13084	2-cell-E1-B2	15.8242	15.9974	15.8637	16.0113	15.4101	16.0343	15.8951	0.0907713	15.8185	0.353912
assay_4	chr4	143383681	C	T	Gm13023	2-cell-E1-B2	16.7723	16.7037	16.391	16.6886	16.8404	16.7696	16.6224	0.203244	16.7662	0.0759316
assay_5	chr9	78159952	A	G	Omt2a	2-cell-E1-B2	11.9271	12.3848	12.2285	11.9623	11.9623	11.9657	12.1801	0.232652	11.9634	0.00197887
assay_6	chr13	65288811	A	G	Nlrp4f	2-cell-E1-B2	15.206	15.1291	15.7521	16.5219	16.7879	16.6217	15.3624	0.339696	16.6438	0.134394
assay_7	chr9	50927971	C	G	no gene	2-cell-E1-B2	12.3351	11.6341	12.2613	20.2568	21.2437	21.2574	12.0769	0.385201	20.9193	0.573793
assay_1	chr3	51055315	T	C	Ccrn4l	2-cell-E4-B2	17.8842	17.8339	17.9831	17.3592	17.4975	17.5034	17.9004	0.0759149	17.4533	0.0816185
assay_2	chr4	143383670	A	T	Gm13023	2-cell-E4-B2	17.5944	17.3716	17.3672	15.0015	15.1203	14.869	17.4444	0.129952	14.9969	0.125712
assay_3	chr4	143400029	A	G	Gm13084	2-cell-E4-B2	15.2785	15.4827	15.3657	15.145	14.5766	14.867	15.3756	0.102468	14.8629	0.284226
assay_4	chr4	143383681	C	T	Gm13023	2-cell-E4-B2	16.4303	16.7471	17.0854	16.1103	16.3866	16.3446	16.7543	0.327609	16.2805	0.148866
assay_5	chr9	78159952	A	G	Omt2a	2-cell-E4-B2	11.0445	11.2618	11.9866	11.0427	11.1676	11.0474	11.431	0.49332	11.0859	0.0707694
assay_6	chr13	65288811	A	G	Nlrp4f	2-cell-E4-B2	13.8519	14.9302	14.4025	15.9985	15.9642	16.0482	14.3949	0.539172	16.0036	0.0422301
assay_7	chr9	50927971	C	G	no gene	2-cell-E4-B2	11.4043	11.7047	11.1315	23.8303	24.7547	24.1578	11.4135	0.286716	24.2476	0.468695
assay_1	chr3	51055315	T	C	Ccrn4l	2-cell-E2-B1	17.3895	17.6408	17.5528	15.8789	15.8652	15.4955	17.5277	0.127545	15.7465	0.217525
assay_2	chr4	143383670	A	T	Gm13023	2-cell-E2-B1	15.8758	15.9036	15.9792	14.5728	14.153	14.4922	15.9195	0.0535266	14.406	0.22281
assay_3	chr4	143400029	A	G	Gm13084	2-cell-E2-B1	14.3424	13.7541	13.8738	14.1324	14.1979	13.9166	13.9901	0.310893	14.0823	0.147185
assay_4	chr4	143383681	C	T	Gm13023	2-cell-E2-B1	15.7568	15.2732	15.2436	15.3662	15.709	16.0377	15.4245	0.288133	15.7043	0.335809
assay_5	chr9	78159952	A	G	Omt2a	2-cell-E2-B1	10.3178	10.8511	10.297	10.0915	10.3686	10.3479	10.4886	0.314051	10.2694	0.154379
assay_6	chr13	65288811	A	G	Nlrp4f	2-cell-E2-B1	13.814	13.6752	13.9941	15.7582	15.6803	15.3256	13.8278	0.15989	15.5881	0.230594
assay_7	chr9	50927971	C	G	no gene	2-cell-E2-B1	10.9877	11.4806	11.1243	12.3245	11.8733	11.9876	11.1976	0.254473	12.0618	0.234609
assay_1	chr3	51055315	T	C	Ccrn4l	2-cell-E2-B2	17.0822	17.1757	16.8972	15.8895	16.316	16.2775	17.0517	0.141721	16.161	0.235951
assay_2	chr4	143383670	A	T	Gm13023	2-cell-E2-B2	16.1242	15.9501	15.4671	13.7493	14.0062	14.1443	15.8471	0.340457	13.9666	0.200437
assay_3	chr4	143400029	A	G	Gm13084	2-cell-E2-B2	14.5097	14.823	14.5067	14.1549	14.4932	14.6944	14.6131	0.181737	14.4475	0.272661
assay_4	chr4	143383681	C	T	Gm13023	2-cell-E2-B2	15.2555	15.8485	15.4033	15.1255	15.398	15.4803	15.5025	0.308679	15.3346	0.185699
assay_5	chr9	78159952	A	G	Omt2a	2-cell-E2-B2	10.9706	10.9854	10.6703	9.74398	10.608	10.5832	10.8754	0.177783	10.3117	0.491833
assay_6	chr13	65288811	A	G	Nlrp4f	2-cell-E2-B2	13.8912	14.2895	13.6951	15.5489	15.5395	15.896	13.9586	0.302886	15.6615	0.203186
assay_7	chr9	50927971	C	G	no gene	2-cell-E2-B2	11.5531	10.894	11.5358	11.8145	11.9904	12.5158	11.3276	0.375648	12.1069	0.364867
assay_1	chr3	51055315	T	C	Ccrn4l	2-cell-E3-B1	16.2487	16.3842	16.606	15.9065	15.8618	15.8634	16.413	0.180386	15.8772	0.0253577
assay_2	chr4	143383670	A	T	Gm13023	2-cell-E3-B1	15.7928	16.0091	15.6298	14.088	13.8376	14.4505	15.8106	0.190261	14.1253	0.308174
assay_3	chr4	143400029	A	G	Gm13084	2-cell-E3-B1	13.5606	13.7521	14.0387	13.6607	13.4405	13.3023	13.7838	0.240634	13.4678	0.180741
assay_4	chr4	143383681	C	T	Gm13023	2-cell-E3-B1	15.236	14.9493	15.6494	14.6743	14.9812	14.6955	15.2782	0.351933	14.7837	0.171411
assay_5	chr9	78159952	A	G	Omt2a	2-cell-E3-B1	10.4711	10.2552	10.6955	10.6934	9.68544	10.3309	10.4739	0.220139	10.2366	0.510576
assay_6	chr13	65288811	A	G	Nlrp4f	2-cell-E3-B1	13.2162	13.8735	13.8528	14.9419	14.8749	14.9927	13.6475	0.373696	14.9365	0.0590684
assay_7	chr9	50927971	C	G	no gene	2-cell-E3-B1	11.7099	10.9841	12.1035	12.1355	11.9292	12.2053	11.5992	0.567824	12.09	0.143567
assay_1	chr3	51055315	T	C	Ccrn4l	2-cell-E3-B2	16.9723	16.8379	16.6311	15.9012	16.2951	15.6022	16.8138	0.171867	15.9328	0.347559
assay_2	chr4	143383670	A	T	Gm13023	2-cell-E3-B2	15.8616	15.6377	16.796	14.1603	14.3158	14.7532	16.0984	0.614416	14.4097	0.30741
assay_3	chr4	143400029	A	G	Gm13084	2-cell-E3-B2	14.0161	13.8457	13.8663	13.9317	13.6429	13.5597	13.9094	0.0929677	13.7115	0.195254
assay_4	chr4	143383681	C	T	Gm13023	2-cell-E3-B2	15.2739	15.6175	15.4376	15.7676	14.8489	15.7712	15.443	0.17186	15.4626	0.531467
assay_5	chr9	78159952	A	G	Omt2a	2-cell-E3-B2	10.9375	11.206	11.0785	10.5256	10.9613	10.4655	11.074	0.134303	10.6508	0.270606
assay_6	chr13	65288811	A	G	Nlrp4f	2-cell-E3-B2	13.7087	13.9015	14.0006	15.26	15.508	15.6008	13.8703	0.148445	15.4563	0.176174
assay_7	chr9	50927971	C	G	no gene	2-cell-E3-B2	11.6326	12.3618	11.8038	12.5659	12.7712	12.2284	11.9327	0.381311	12.5218	0.274091
assay_1	chr3	51055315	T	C	Ccrn4l	2-cell-E4-B1	17.5875	17.2353	17.7834	16.3108	16.202	16.4115	17.5354	0.277723	16.3081	0.104748
assay_2	chr4	143383670	A	T	Gm13023	2-cell-E4-B1	16.6968	16.9754	17.3168	14.451	14.9482	14.9298	16.9963	0.310557	14.7763	0.281904
assay_3	chr4	143400029	A	G	Gm13084	2-cell-E4-B1	14.8555	15.0376	14.8116	14.3887	14.5533	14.702	14.9015	0.119865	14.548	0.156703
assay_4	chr4	143383681	C	T	Gm13023	2-cell-E4-B1	16.6894	16.2242	16.4047	15.826	15.5617	16.4681	16.4394	0.234547	15.9519	0.466146
assay_5	chr9	78159952	A	G	Omt2a	2-cell-E4-B1	11.0312	10.7016	10.8273	10.1344	9.85144	10.4706	10.8534	0.166359	10.1521	0.309968
assay_6	chr13	65288811	A	G	Nlrp4f	2-cell-E4-B1	14.0026	14.1773	13.9941	15.902	15.5567	15.687	14.058	0.103366	15.7152	0.174367
assay_7	chr9	50927971	C	G	no gene	2-cell-E4-B1	10.2515	10.2618	10.2124	23.2204	23.326	22.682	10.2419	0.0260931	23.0761	0.345374
assay_8	chr1	137198396	T	C	Timm17a	4-cell-E1-B1	25.1385	25.2402	25.0205	19.0182	19.252	19.1525	25.1331	0.109978	19.1409	0.117333
assay_9	chr1	173393882	T	C	F11r	4-cell-E1-B1	29.5859	29.2908	29.4794	20.9716	21.1331	20.9336	29.4521	0.149488	21.0128	0.105948
assay_10	chr2	118301831	A	T	Srp14	4-cell-E1-B1	27.4067	27.1703	27.3934	19.7982	19.7857	19.4467	27.3234	0.132841	19.6769	0.199427
assay_11	chr3	36464956	A	G	Ccna2	4-cell-E1-B1	22.2617	22.3696	21.8077	20.1764	20.1026	19.7098	22.1463	0.298173	19.9963	0.25083
assay_12	chr4	117429538	C	T	Klf17	4-cell-E1-B1	19.2843	19.1693	19.2999	20.8513	20.7316	20.6744	19.2512	0.071321	20.7524	0.0903083
assay_13	chr5	31338840	G	A	Slc5a6	4-cell-E1-B1	27.3062	26.489	26.8485	20.6664	21.0859	20.7551	26.8812	0.409613	20.8358	0.221107
assay_14	chr5	31338942	G	T	Slc5a6	4-cell-E1-B1	28.2644	28.4164	28.554	23.2203	23.4862	23.3007	28.4116	0.14485	23.3357	0.136362
assay_15	chr6	82597860	C	G	Pole4	4-cell-E1-B1	19.8077	19.9037	20.0788	21.7627	21.1111	21.876	19.9301	0.137478	21.5833	0.412843
assay_16	chr9	96233485	T	C	Atp1b3	4-cell-E1-B1	21.6597	21.961	22.6648	26.367	27.8898	27.0034	22.0952	0.515839	27.0867	0.764811
assay_17	chr11	46484390	C	T	Timd2	4-cell-E1-B1	30.5802	31.0624	31.6427	22.3816	22.5122	22.2677	31.0951	0.531982	22.3872	0.12233
assay_18	chr17	6084660	G	A	Gtf2h5	4-cell-E1-B1	29.0274	28.0552	28.9214	21.1831	21.0034	21.3269	28.668	0.533328	21.1711	0.162105
assay_19	chr18	34792353	C	T	Kif20a,Cdc23	4-cell-E1-B1	21.7816	21.5172	21.845	34.2444	37.2485	36.9899	21.7146	0.173884	36.1609	1.66478
assay_8	chr1	137198396	T	C	Timm17a	4-cell-E3-B2	24.8767	24.7711	24.6741	18.7409	18.7168	18.7706	24.774	0.101349	18.7428	0.0269468
assay_9	chr1	173393882	T	C	F11r	4-cell-E3-B2	28.2308	28.3221	28.8572	19.7733	19.9316	19.7978	28.47	0.338341	19.8342	0.0852475
assay_10	chr2	118301831	A	T	Srp14	4-cell-E3-B2	21.8144	21.7608	21.3482	20.7511	20.9591	20.5805	21.6411	0.255114	20.7636	0.189601
assay_11	chr3	36464956	A	G	Ccna2	4-cell-E3-B2	22.1423	22.3793	22.7136	21.3227	21.4329	21.307	22.4117	0.287034	21.3542	0.0685834
assay_12	chr4	117429538	C	T	Klf17	4-cell-E3-B2	18.1905	17.872	18.2525	22.3465	22.2425	22.1039	18.105	0.204156	22.231	0.121738
assay_13	chr5	31338840	G	A	Slc5a6	4-cell-E3-B2	20.1092	20.4531	19.7495	20.8335	21.0572	21.0226	20.1039	0.351807	20.9711	0.120428
assay_14	chr5	31338942	G	T	Slc5a6	4-cell-E3-B2	21.4957	21.5202	21.4622	23.7907	23.9129	24.2806	21.4927	0.0291323	23.9947	0.254975
assay_15	chr6	82597860	C	G	Pole4	4-cell-E3-B2	38.2625	43.2462	42.0977	19.6782	20.7536	19.8784	41.2021	2.60974	20.1034	0.571922
assay_16	chr9	96233485	T	C	Atp1b3	4-cell-E3-B2	20.8674	21.4377	21.3997	25.0017	25.2407	25.2261	21.2349	0.31886	25.1562	0.133936
assay_17	chr11	46484390	C	T	Timd2	4-cell-E3-B2	22.9361	23.0549	22.9957	22.2157	21.6426	22.3351	22.9955	0.0594071	22.0645	0.370181
assay_18	chr17	6084660	G	A	Gtf2h5	4-cell-E3-B2	27.9707	27.8625	28.229	21.2477	21.1065	20.5803	28.0207	0.188281	20.9781	0.351703
assay_19	chr18	34792353	C	T	Kif20a,Cdc23	4-cell-E3-B2	21.1336	21.2375	21.1134	36.7573	37.0092	36.2256	21.1615	0.0665884	36.664	0.400038
assay_8	chr1	137198396	T	C	Timm17a	4-cell-E1-B2	24.7161	24.5521	24.4457	19.0008	18.595	19.0782	24.5713	0.136221	18.8914	0.259527
assay_9	chr1	173393882	T	C	F11r	4-cell-E1-B2	29.535	29.4037	28.6891	20.5869	20.5273	20.9804	29.2093	0.455254	20.6982	0.246203
assay_10	chr2	118301831	A	T	Srp14	4-cell-E1-B2	26.8406	27.2252	27.1615	19.7516	19.8414	19.8402	27.0757	0.206141	19.8111	0.0514739
assay_11	chr3	36464956	A	G	Ccna2	4-cell-E1-B2	21.9309	22.0958	22.1344	20.0428	19.6322	20.1486	22.0537	0.1081	19.9412	0.272799
assay_12	chr4	117429538	C	T	Klf17	4-cell-E1-B2	19.2388	19.2322	19.6851	19.9785	19.2672	19.9944	19.3854	0.259638	19.7467	0.41531
assay_13	chr5	31338840	G	A	Slc5a6	4-cell-E1-B2	27.1012	26.8734	26.6897	21.0467	20.4958	21.0745	26.8881	0.206142	20.8723	0.326391
assay_14	chr5	31338942	G	T	Slc5a6	4-cell-E1-B2	28.0864	28.4424	28.2543	23.7467	23.2231	23.1157	28.261	0.178074	23.3618	0.337621
assay_15	chr6	82597860	C	G	Pole4	4-cell-E1-B2	20.2575	19.102	20.3425	21.1749	21.3113	21.6643	19.9006	0.692927	21.3835	0.252561
assay_16	chr9	96233485	T	C	Atp1b3	4-cell-E1-B2	22.6824	23.0754	22.665	27.3583	27.5573	27.1409	22.8076	0.232076	27.3521	0.208275
assay_17	chr11	46484390	C	T	Timd2	4-cell-E1-B2	31.4581	30.0296	32.0966	22.69	22.5593	22.7438	31.1948	1.05841	22.6644	0.0948815
assay_18	chr17	6084660	G	A	Gtf2h5	4-cell-E1-B2	28.8644	28.6852	28.7189	21.2009	21.0464	21.3535	28.7562	0.0952197	21.2003	0.153519
assay_19	chr18	34792353	C	T	Kif20a,Cdc23	4-cell-E1-B2	21.1391	20.625	21.2979	36.1168	35.0198	33.204	21.0207	0.351751	34.7802	1.47112
assay_8	chr1	137198396	T	C	Timm17a	4-cell-E2-B1	25.1805	24.7314	24.8126	18.889	18.9002	18.6328	24.9081	0.239312	18.8073	0.151257
assay_9	chr1	173393882	T	C	F11r	4-cell-E2-B1	27.4541	28.192	28.8575	19.5291	19.7199	19.1092	28.1679	0.702027	19.4527	0.312407
assay_10	chr2	118301831	A	T	Srp14	4-cell-E2-B1	22.5672	23.3117	23.0837	21.6648	21.8532	21.957	22.9875	0.381481	21.825	0.148125
assay_11	chr3	36464956	A	G	Ccna2	4-cell-E2-B1	22.7557	22.4246	23.271	20.5754	20.3849	20.5612	22.8171	0.426532	20.5072	0.106091
assay_12	chr4	117429538	C	T	Klf17	4-cell-E2-B1	21.4207	21.3318	20.9401	19.3914	19.3033	19.3012	21.2309	0.255677	19.332	0.0514555
assay_13	chr5	31338840	G	A	Slc5a6	4-cell-E2-B1	28.2023	27.9358	28.3344	22.3854	21.4644	22.1604	28.1575	0.203009	22.0034	0.480152
assay_14	chr5	31338942	G	T	Slc5a6	4-cell-E2-B1	29.7757	29.821	29.2544	24.4631	24.548	24.7	29.617	0.314848	24.5704	0.120063
assay_15	chr6	82597860	C	G	Pole4	4-cell-E2-B1	19.9492	19.9168	19.659	44.4855	42.184	42.071	19.8417	0.159055	42.9135	1.36255
assay_16	chr9	96233485	T	C	Atp1b3	4-cell-E2-B1	23.042	23.2693	23.7584	27.2548	27.1974	27.5861	23.3566	0.366085	27.3461	0.20981
assay_17	chr11	46484390	C	T	Timd2	4-cell-E2-B1	23.5679	23.358	24.14	23.0543	23.4145	23.5589	23.6886	0.404761	23.3426	0.259891
assay_18	chr17	6084660	G	A	Gtf2h5	4-cell-E2-B1	21.0844	20.9666	21.0831	31.9164	31.3485	30.9898	21.0447	0.0676504	31.4182	0.467225
assay_19	chr18	34792353	C	T	Kif20a,Cdc23	4-cell-E2-B1	31.3205	33.1899	33.1262	25.6053	24.6812	25.3156	32.5455	1.06142	25.2007	0.472621
assay_8	chr1	137198396	T	C	Timm17a	4-cell-E2-B2	24.9592	24.9266	25.125	18.691	18.9678	18.4974	25.0036	0.106368	18.7187	0.236422
assay_9	chr1	173393882	T	C	F11r	4-cell-E2-B2	27.7663	27.5992	27.3651	19.774	19.9428	20.2184	27.5769	0.201549	19.9784	0.224354
assay_10	chr2	118301831	A	T	Srp14	4-cell-E2-B2	23.6827	24.1169	23.8077	21.5426	21.6473	21.661	23.8691	0.223539	21.6169	0.0647789
assay_11	chr3	36464956	A	G	Ccna2	4-cell-E2-B2	22.0462	22.1213	22.2416	19.8823	19.956	20.2459	22.1364	0.098531	20.028	0.192203
assay_12	chr4	117429538	C	T	Klf17	4-cell-E2-B2	20.0699	20.4147	20.5379	18.2837	18.2799	18.4411	20.3409	0.24258	18.3349	0.0919665
assay_13	chr5	31338840	G	A	Slc5a6	4-cell-E2-B2	26.8115	27.0356	27.1394	20.4972	20.8537	21.1605	26.9955	0.167581	20.8372	0.331943
assay_14	chr5	31338942	G	T	Slc5a6	4-cell-E2-B2	28.113	28.5519	27.9941	23.3345	23.7965	23.3793	28.2197	0.293788	23.5034	0.254766
assay_15	chr6	82597860	C	G	Pole4	4-cell-E2-B2	19.0541	19.0509	19.0472	37.0954	39.3674	39.4969	19.0507	0.00345639	38.6533	1.35067
assay_16	chr9	96233485	T	C	Atp1b3	4-cell-E2-B2	22.0029	21.8825	22.2321	26.9697	26.9197	26.9559	22.0392	0.177606	26.9485	0.0258181
assay_17	chr11	46484390	C	T	Timd2	4-cell-E2-B2	23.9935	23.522	23.8828	22.803	23.1961	23.3389	23.7994	0.246551	23.1127	0.277521
assay_18	chr17	6084660	G	A	Gtf2h5	4-cell-E2-B2	20.2339	20.1275	20.6545	30.9832	30.3894	30.8754	20.3386	0.278693	30.7493	0.316355
assay_19	chr18	34792353	C	T	Kif20a,Cdc23	4-cell-E2-B2	30.4854	31.6783	32.4954	23.8207	23.8215	24.0827	31.5531	1.01083	23.9083	0.151066
assay_8	chr1	137198396	T	C	Timm17a	4-cell-E3-B1	24.9791	24.6368	25.174	18.4664	19.2031	18.8586	24.93	0.271956	18.8427	0.368614
assay_9	chr1	173393882	T	C	F11r	4-cell-E3-B1	29.6697	29.2283	30.0178	20.8451	20.8555	20.532	29.6386	0.395666	20.7442	0.183821
assay_10	chr2	118301831	A	T	Srp14	4-cell-E3-B1	21.7506	21.8242	22.2135	21.0857	21.6025	21.3891	21.9294	0.24876	21.3591	0.259716
assay_11	chr3	36464956	A	G	Ccna2	4-cell-E3-B1	21.7718	21.6398	21.9208	20.7695	21.0968	20.9983	21.7774	0.140577	20.9548	0.167951
assay_12	chr4	117429538	C	T	Klf17	4-cell-E3-B1	19.3681	18.6063	19.2657	21.7299	22.0108	21.8082	19.08	0.413459	21.8496	0.144956
assay_13	chr5	31338840	G	A	Slc5a6	4-cell-E3-B1	20.4121	20.344	20.4832	21.9595	21.6796	21.6894	20.4131	0.0695942	21.7762	0.15882
assay_14	chr5	31338942	G	T	Slc5a6	4-cell-E3-B1	21.9868	22.0031	22.0182	24.8586	24.5705	25.1011	22.0027	0.0157134	24.8434	0.265619
assay_15	chr6	82597860	C	G	Pole4	4-cell-E3-B1	43.1492	40.4211	39.4839	21.5109	20.8701	21.3282	41.0181	1.90418	21.2364	0.330126
assay_16	chr9	96233485	T	C	Atp1b3	4-cell-E3-B1	22.541	22.073	22.667	24.384	24.454	24.3356	22.427	0.312999	24.3912	0.0595387
assay_17	chr11	46484390	C	T	Timd2	4-cell-E3-B1	23.5526	23.5117	23.5113	22.5706	22.3983	22.7159	23.5252	0.0237413	22.5616	0.159012
assay_18	chr17	6084660	G	A	Gtf2h5	4-cell-E3-B1	21.495	21.4279	21.3952	21.495	21.4279	21.3952	21.4394	0.0508988	21.4394	0.0508988
assay_19	chr18	34792353	C	T	Kif20a,Cdc23	4-cell-E3-B1	20.8927	20.7111	21.789	37.3668	36.8752	35.6568	21.1309	0.577116	36.6329	0.880412
assay_20	chr1	173393882	T	C	F11r	8-cell-E1-B1	18.8167	18.0131	18.6883	24.8863	24.8743	24.7438	18.506	0.431696	24.8348	0.0790267
assay_21	chr4	117429538	C	T	Klf17	8-cell-E1-B1	19.0483	19.4708	19.1583	19.8602	19.9135	19.9675	19.2258	0.219204	19.9137	0.0536635
assay_22	chr2	142897304	A	G	Snrpb2	8-cell-E1-B1	23.7616	23.7635	23.6149	19.1892	19.1642	19.0768	23.7133	0.085237	19.1434	0.0590055
assay_23	chr5	130321697	G	A	Cct6a	8-cell-E1-B1	18.5072	18.5497	18.255	30.9622	30.613	31.1489	18.4373	0.159328	30.9081	0.272029
assay_24	chr9	64023990	C	T	Rpl4	8-cell-E1-B1	29.4996	29.0321	29.1049	20.8923	21.6342	21.3041	29.2122	0.251504	21.2769	0.371665
assay_25	chr11	6328302	G	A	H2afv	8-cell-E1-B1	26.9631	26.9089	26.4008	19.5067	19.6635	19.6307	26.7576	0.310157	19.6003	0.0827025
assay_26	chr11	6328309	C	T	H2afv	8-cell-E1-B1	26.3929	26.0461	25.8893	19.3389	19.1191	19.3292	26.1094	0.257714	19.2624	0.124211
assay_20	chr1	173393882	T	C	F11r	8-cell-E3-B2	18.8011	19.2661	19.2301	18.8676	19.0471	18.9322	19.0991	0.258696	18.949	0.0909189
assay_21	chr4	117429538	C	T	Klf17	8-cell-E3-B2	18.6802	18.8931	18.1774	26.0098	26.1779	26.2178	18.5836	0.367513	26.1352	0.110374
assay_22	chr2	142897304	A	G	Snrpb2	8-cell-E3-B2	20.1761	20.2244	20.4717	19.1346	18.4223	18.9075	20.2907	0.15855	18.8215	0.363886
assay_23	chr5	130321697	G	A	Cct6a	8-cell-E3-B2	24.2671	24.2596	24.3009	20.5211	20.877	20.5351	24.2759	0.0220136	20.6444	0.201578
assay_24	chr9	64023990	C	T	Rpl4	8-cell-E3-B2	28.6859	29.8874	30.7926	21.1975	20.8854	20.9696	29.7887	1.0568	21.0175	0.161483
assay_25	chr11	6328302	G	A	H2afv	8-cell-E3-B2	18.9999	19.195	19.2966	21.9569	22.114	22.0169	19.1638	0.150772	22.0293	0.0792647
assay_26	chr11	6328309	C	T	H2afv	8-cell-E3-B2	18.822	18.8182	18.8203	27.3014	27.6135	26.6676	18.8202	0.0019242	27.1941	0.48201
assay_20	chr1	173393882	T	C	F11r	8-cell-E1-B2	19.0147	19.8565	18.7217	25.7697	25.9067	25.4372	19.1976	0.589087	25.7045	0.241401
assay_21	chr4	117429538	C	T	Klf17	8-cell-E1-B2	19.6457	19.9585	19.4531	20.5055	20.8851	20.3067	19.6858	0.255108	20.5658	0.293871
assay_22	chr2	142897304	A	G	Snrpb2	8-cell-E1-B2	23.4807	23.6998	23.7647	18.628	19.0519	18.8655	23.6484	0.148835	18.8485	0.212425
assay_23	chr5	130321697	G	A	Cct6a	8-cell-E1-B2	18.4761	18.4432	18.5418	31.0448	31.6295	31.9478	18.487	0.0502205	31.5407	0.458002
assay_24	chr9	64023990	C	T	Rpl4	8-cell-E1-B2	29.9881	30.2744	29.0972	21.613	21.6203	21.8176	29.7866	0.61391	21.6836	0.116081
assay_25	chr11	6328302	G	A	H2afv	8-cell-E1-B2	27.2408	26.8038	27.4813	19.3215	19.2485	18.9745	27.1753	0.343497	19.1815	0.182944
assay_26	chr11	6328309	C	T	H2afv	8-cell-E1-B2	25.8815	26.907	26.1935	19.05	19.3207	18.6819	26.3273	0.52568	19.0175	0.320641
assay_20	chr1	173393882	T	C	F11r	8-cell-E2-B1	18.8194	18.3988	19.2609	25.7377	25.0806	25.5181	18.8264	0.43112	25.4455	0.334532
assay_21	chr4	117429538	C	T	Klf17	8-cell-E2-B1	18.8602	19.2507	19.1064	19.7874	20.1354	20.0685	19.0724	0.197426	19.9971	0.184642
assay_22	chr2	142897304	A	G	Snrpb2	8-cell-E2-B1	23.4638	23.4553	23.6491	19.046	18.9155	18.8704	23.5227	0.10952	18.9439	0.091194
assay_23	chr5	130321697	G	A	Cct6a	8-cell-E2-B1	19.093	18.5457	18.5694	31.3059	31.5419	32.0033	18.7361	0.309378	31.6171	0.354746
assay_24	chr9	64023990	C	T	Rpl4	8-cell-E2-B1	28.5808	29.1134	28.7423	20.6039	21.041	21.002	28.8122	0.27309	20.8823	0.241894
assay_25	chr11	6328302	G	A	H2afv	8-cell-E2-B1	26.563	26.138	26.2915	18.7795	18.9282	18.826	26.3308	0.215216	18.8445	0.0760854
assay_26	chr11	6328309	C	T	H2afv	8-cell-E2-B1	25.4074	25.5844	26.5569	19.0146	18.555	20.241	25.8496	0.618943	19.2702	0.871583
assay_20	chr1	173393882	T	C	F11r	8-cell-E2-B2	19.0137	18.9683	19.5972	24.8655	25.6815	26.0904	19.1931	0.350745	25.5458	0.623621
assay_21	chr4	117429538	C	T	Klf17	8-cell-E2-B2	19.3053	19.7295	19.3026	19.3401	19.4266	19.2576	19.4458	0.245699	19.3414	0.0845183
assay_22	chr2	142897304	A	G	Snrpb2	8-cell-E2-B2	24.0522	24.1491	23.9389	18.9397	19.2597	19.8687	24.0467	0.105175	19.3561	0.471916
assay_23	chr5	130321697	G	A	Cct6a	8-cell-E2-B2	18.4085	18.6183	18.7932	30.7432	31.6699	31.5601	18.6066	0.192608	31.3244	0.506319
assay_24	chr9	64023990	C	T	Rpl4	8-cell-E2-B2	30.5911	29.8645	29.6241	21.0695	21.0089	21.3904	30.0266	0.503486	21.1563	0.204983
assay_25	chr11	6328302	G	A	H2afv	8-cell-E2-B2	26.7372	26.7297	27.1604	19.5931	19.7444	19.6794	26.8758	0.246558	19.6723	0.0758875
assay_26	chr11	6328309	C	T	H2afv	8-cell-E2-B2	25.3288	25.3043	25.3403	19.1497	19.7046	19.5916	25.3245	0.0183991	19.482	0.29322
assay_20	chr1	173393882	T	C	F11r	8-cell-E3-B1	20.1494	19.8789	19.5	19.0588	19.8862	19.4085	19.8428	0.326225	19.4512	0.415334
assay_21	chr4	117429538	C	T	Klf17	8-cell-E3-B1	18.0443	17.8724	17.9757	25.866	25.3577	25.9245	17.9641	0.0865614	25.716	0.311728
assay_22	chr2	142897304	A	G	Snrpb2	8-cell-E3-B1	20.9907	20.8428	20.9613	19.6524	20.1598	19.4185	20.9316	0.078305	19.7435	0.37895
assay_23	chr5	130321697	G	A	Cct6a	8-cell-E3-B1	24.7651	25.4033	25.1998	21.3169	21.5755	21.1988	25.1227	0.326018	21.3637	0.192675
assay_24	chr9	64023990	C	T	Rpl4	8-cell-E3-B1	30.6312	28.974	29.9536	21.4084	20.9306	21.3535	29.8529	0.833169	21.2308	0.261413
assay_25	chr11	6328302	G	A	H2afv	8-cell-E3-B1	18.8067	19.3875	19.428	21.9712	21.9341	21.9622	19.2074	0.347582	21.9558	0.0193141
assay_26	chr11	6328309	C	T	H2afv	8-cell-E3-B1	18.592	19.0297	19.0909	27.3906	27.294	27.2503	18.9042	0.272057	27.3116	0.0717749
assay_1	chr3	51055315	T	C	Ccrn4l	NTC	28.986	28.5268	28.4764	32.0102	32.1355	31.7998	28.6631	0.280822	31.9818	0.169631
assay_2	chr4	143383670	A	T	Gm13023	NTC	39.717	35.9668	37.9601	30.1391	32.1336	31.5905	37.8813	1.87635	31.2877	1.03116
assay_3	chr4	143400029	A	G	Gm13084	NTC	34.8595	32.4081	33.8045	36.3507	38.5142	39.6158	33.6907	1.22967	38.1602	1.66106
assay_4	chr4	143383681	C	T	Gm13023	NTC	37.2484	34.6547	32.8489	40.4152	44.3929	36.9067	34.9174	2.21147	40.5716	3.74557
assay_5	chr9	78159952	A	G	Omt2a	NTC	45	44.2726	45	43.8181	45	21.3114	44.7575	0.41999	36.7098	13.3485
assay_6	chr13	65288811	A	G	Nlrp4f	NTC	34.9052	33.2852	32.8058	37.3562	37.6794	35.9594	33.6654	1.10012	36.9983	0.91414
assay_7	chr9	50927971	C	G	no gene	NTC	33.666	33.618	33.4611	36.9795	40.5545	33.5618	33.5817	0.107153	37.0319	3.49661
assay_8	chr1	137198396	T	C	Timm17a	NTC	45	45	45	45	45	45	45	0	45	0
assay_9	chr1	173393882	T	C	F11r	NTC	45	45	45	45	45	45	45	0	45	0
assay_10	chr2	118301831	A	T	Srp14	NTC	28.1772	28.4166	28.5568	36.8861	33.7746	36.6441	28.3835	0.191979	35.7683	1.73077
assay_11	chr3	36464956	A	G	Ccna2	NTC	45	45	44.9634	45	42.8773	45	44.9878	0.0211212	44.2924	1.22552
assay_12	chr4	117429538	C	T	Klf17	NTC	45	45	45	31.6888	31.981	31.296	45	0	31.6553	0.343723
assay_13	chr5	31338840	G	A	Slc5a6	NTC	45	45	45	45	45	39.583	45	0	43.1943	3.1275
assay_14	chr5	31338942	G	T	Slc5a6	NTC	45	45	37.4479	45	45	45	42.4826	4.36021	45	0
assay_15	chr6	82597860	C	G	Pole4	NTC	45	45	45	45	45	45	45	0	45	0
assay_16	chr9	96233485	T	C	Atp1b3	NTC	36.2894	45	40.0529	32.9234	31.6149	32.8002	40.4474	4.36869	32.4462	0.722509
assay_17	chr11	46484390	C	T	Timd2	NTC	37.2963	33.9354	36.1953	39.7765	41.6766	37.0274	35.809	1.7134	39.4935	2.33751
assay_18	chr17	6084660	G	A	Gtf2h5	NTC	38.5475	39.6159	35.9203	41.0965	45	41.4818	38.0279	1.90179	42.5261	2.1511
assay_19	chr18	34792353	C	T	Kif20a,Cdc23	NTC	43.8783	40.9888	44.0105	45	45	42.8795	42.9592	1.70766	44.2932	1.22428
assay_20	chr1	173393882	T	C	F11r	NTC	45	45	45	45	45	45	45	0	45	0
assay_21	chr4	117429538	C	T	Klf17	NTC	45	45	45	31.5142	32.8162	31.7327	45	0	32.021	0.697225
assay_22	chr2	142897304	A	G	Snrpb2	NTC	36.7873	45	45	45	45	45	42.2624	4.74158	45	0
assay_23	chr5	130321697	G	A	Cct6a	NTC	42.1896	45	45	45	45	45	44.0632	1.62259	45	0
assay_24	chr9	64023990	C	T	Rpl4	NTC	34.5955	40.1234	36.2819	45	45	45	37.0003	2.83305	45	0
assay_25	chr11	6328302	G	A	H2afv	NTC	45	40.254	45	44.1232	45	45	43.418	2.74012	44.7077	0.506232
assay_26	chr11	6328309	C	T	H2afv	NTC	42.6725	41.8068	41.1816	45	42.1463	42.5226	41.887	0.748698	43.223	1.55041

## Sheet: summary
assay ID	SNP location	cell types	Chromosome	sample name	first_allele (reference)	second_allele (alternative)	geneName	SOLiD_counts_first_allele	SOLiD_counts_second_allele	SOLiD_log(allelic_ratio)	SOLiD_p-value	qPCR_meanCT_first_allele	qPCR_meanCT_second_allele	qPCR_log(allelic_ratio)	qPCR_p-value	For Ct values >28, we did not calculate the allele ratios
assay_1	51055315	2-cell-E1-B1	chr3	2cell_A11	T	C	Ccrn4l	26	91	-1.80735	1.86381e-09	18.6066	18.193	-0.413591	0.144521
assay_2	143383670	2-cell-E1-B1	chr4	2cell_A11	A	T	Gm13023	48	164	-1.77259	1.62687e-15	16.9683	15.6964	-1.2719	0.00525294
assay_3	143400029	2-cell-E1-B1	chr4	2cell_A11	A	G	Gm13084	63	349	-2.4698	4.36271e-45	15.9774	15.3257	-0.651714	0.0182909
assay_4	143383681	2-cell-E1-B1	chr4	2cell_A11	C	T	Gm13023	43	180	-2.06559	4.54946e-20	16.6759	18.0061	1.33023	0.483647
assay_5	78159952	2-cell-E1-B1	chr9	2cell_A11	A	G	Omt2a	310	179	0.792309	3.14156e-09	12.203	11.6883	-0.514751	0.198665
assay_6	65288811	2-cell-E1-B1	chr13	2cell_A11	A	G	Nlrp4f	361	109	1.72767	3.11606e-31	15.0502	16.4302	1.38004	0.0243868
assay_7	50927971	2-cell-E1-B1	chr9	2cell_A11	C	G	no gene	5397	61	6.4672	0	11.9632	20.6914	8.72819	1.13023e-06
assay_1	51055315	2-cell-E1-B2	chr3	2cell_A12	T	C	Ccrn4l	54	87	-0.688056	0.00545095	18.1179	17.8567	-0.261264	0.218397
assay_2	143383670	2-cell-E1-B2	chr4	2cell_A12	A	T	Gm13023	53	152	-1.52001	4.69649e-12	17.0115	15.6826	-1.32889	0.0266641
assay_3	143400029	2-cell-E1-B2	chr4	2cell_A12	A	G	Gm13084	53	424	-3	1.02634e-64	15.8951	15.8185	-0.0765803	0.747742
assay_4	143383681	2-cell-E1-B2	chr4	2cell_A12	C	T	Gm13023	50	163	-1.70487	9.73793e-15	16.6224	16.7662	0.143833	0.347196
assay_5	78159952	2-cell-E1-B2	chr9	2cell_A12	A	G	Omt2a	289	151	0.936521	4.73967e-11	12.1801	11.9634	-0.216712	0.247996
assay_6	65288811	2-cell-E1-B2	chr13	2cell_A12	A	G	Nlrp4f	285	86	1.72855	5.0726e-25	15.3624	16.6438	1.28147	0.0131988
assay_7	50927971	2-cell-E1-B2	chr9	2cell_A12	C	G	no gene	7077	63	6.81164	0	12.0769	20.9193	8.84243	6.9007e-05
assay_1	51055315	2-cell-E2-B1	chr3	2cell_B5	T	C	Ccrn4l	22	109	-2.30875	2.9334e-14	17.5277	15.7465	-1.78116	0.000815936
assay_2	143383670	2-cell-E2-B1	chr4	2cell_B5	A	T	Gm13023	51	190	-1.89743	3.43522e-19	15.9195	14.406	-1.51357	0.00503713
assay_3	143400029	2-cell-E2-B1	chr4	2cell_B5	A	G	Gm13084	61	330	-2.43558	3.79561e-42	13.9901	14.0823	0.0922253	0.675487
assay_4	143383681	2-cell-E2-B1	chr4	2cell_B5	C	T	Gm13023	44	194	-2.14048	2.40455e-22	15.4245	15.7043	0.279796	0.336249
assay_5	78159952	2-cell-E2-B1	chr9	2cell_B5	A	G	Omt2a	259	105	1.30256	6.92731e-16	10.4886	10.2694	-0.219271	0.359345
assay_6	65288811	2-cell-E2-B1	chr13	2cell_B5	A	G	Nlrp4f	231	77	1.58496	1.70958e-18	13.8278	15.5881	1.7603	0.000739982
assay_7	50927971	2-cell-E2-B1	chr9	2cell_B5	C	G	no gene	2591	967	1.42192	3.2023e-163	11.1976	12.0618	0.864243	0.0125787
assay_1	51055315	2-cell-E2-B2	chr3	2cell_B6	T	C	Ccrn4l	77	148	-0.942667	2.20862e-06	17.0517	16.161	-0.890713	0.00882488
assay_2	143383670	2-cell-E2-B2	chr4	2cell_B6	A	T	Gm13023	45	245	-2.44478	7.54522e-32	15.8471	13.9666	-1.8805	0.00279916
assay_3	143400029	2-cell-E2-B2	chr4	2cell_B6	A	G	Gm13084	55	349	-2.66572	1.88807e-48	14.6131	14.4475	-0.165621	0.437515
assay_4	143383681	2-cell-E2-B2	chr4	2cell_B6	C	T	Gm13023	44	249	-2.50057	4.73377e-33	15.5025	15.3346	-0.167893	0.473948
assay_5	78159952	2-cell-E2-B2	chr9	2cell_B6	A	G	Omt2a	338	159	1.088	9.80725e-16	10.8754	10.3117	-0.563717	0.17625
assay_6	65288811	2-cell-E2-B2	chr13	2cell_B6	A	G	Nlrp4f	310	122	1.34539	1.49454e-19	13.9586	15.6615	1.70285	0.00220419
assay_7	50927971	2-cell-E2-B2	chr9	2cell_B6	C	G	no gene	3591	1577	1.1872	1.05232e-172	11.3276	12.1069	0.779264	0.061548
assay_1	51055315	2-cell-E3-B1	chr3	2cell_B7	T	C	Ccrn4l	35	82	-1.22827	1.3918e-05	16.413	15.8772	-0.535747	0.0336126
assay_2	143383670	2-cell-E3-B1	chr4	2cell_B7	A	T	Gm13023	29	142	-2.29177	5.55643e-18	15.8106	14.1253	-1.68523	0.00269412
assay_3	143400029	2-cell-E3-B1	chr4	2cell_B7	A	G	Gm13084	39	275	-2.81789	1.81306e-40	13.7838	13.4678	-0.315977	0.148662
assay_4	143383681	2-cell-E3-B1	chr4	2cell_B7	C	T	Gm13023	33	151	-2.19401	3.34599e-18	15.2782	14.7837	-0.49454	0.119595
assay_5	78159952	2-cell-E3-B1	chr9	2cell_B7	A	G	Omt2a	204	71	1.52268	1.05572e-15	10.4739	10.2366	-0.237348	0.518309
assay_6	65288811	2-cell-E3-B1	chr13	2cell_B7	A	G	Nlrp4f	224	73	1.61753	1.91972e-18	13.6475	14.9365	1.28898	0.0245434
assay_7	50927971	2-cell-E3-B1	chr9	2cell_B7	C	G	no gene	1628	664	1.29385	3.58196e-90	11.5992	12.09	0.490811	0.270292
assay_1	51055315	2-cell-E3-B2	chr3	2cell_B8	T	C	Ccrn4l	37	163	-2.13927	5.12422e-19	16.8138	15.9328	-0.880926	0.030645
assay_2	143383670	2-cell-E3-B2	chr4	2cell_B8	A	T	Gm13023	67	261	-1.96182	8.95463e-27	16.0984	14.4097	-1.68871	0.0247017
assay_3	143400029	2-cell-E3-B2	chr4	2cell_B8	A	G	Gm13084	66	540	-3.03242	1.28339e-82	13.9094	13.7115	-0.197919	0.215397
assay_4	143383681	2-cell-E3-B2	chr4	2cell_B8	C	T	Gm13023	65	262	-2.01106	1.22943e-27	15.443	15.4626	0.0195927	0.956221
assay_5	78159952	2-cell-E3-B2	chr9	2cell_B8	A	G	Omt2a	352	173	1.0248	5.61981e-15	11.074	10.6508	-0.423165	0.0957329
assay_6	65288811	2-cell-E3-B2	chr13	2cell_B8	A	G	Nlrp4f	389	141	1.46407	4.64567e-27	13.8703	15.4563	1.58602	0.000332421
assay_7	50927971	2-cell-E3-B2	chr9	2cell_B8	C	G	no gene	3063	1264	1.27695	1.11705e-164	11.9327	12.5218	0.589108	0.102431
assay_1	51055315	2-cell-E4-B1	chr3	2cell_B9	T	C	Ccrn4l	13	65	-2.32193	3.91274e-09	17.5354	16.3081	-1.22729	0.0093338
assay_2	143383670	2-cell-E4-B1	chr4	2cell_B9	A	T	Gm13023	20	102	-2.3505	1.13694e-13	16.9963	14.7763	-2.22001	0.000820842
assay_3	143400029	2-cell-E4-B1	chr4	2cell_B9	A	G	Gm13084	30	227	-2.91966	1.04397e-34	14.9015	14.548	-0.353542	0.0394631
assay_4	143383681	2-cell-E4-B1	chr4	2cell_B9	C	T	Gm13023	21	106	-2.3356	4.60939e-14	16.4394	15.9519	-0.487515	0.205534
assay_5	78159952	2-cell-E4-B1	chr9	2cell_B9	A	G	Omt2a	154	90	0.774933	4.18213e-05	10.8534	10.1521	-0.701239	0.0395489
assay_6	65288811	2-cell-E4-B1	chr13	2cell_B9	A	G	Nlrp4f	191	60	1.67054	1.35488e-16	14.058	15.7152	1.65722	0.000494101
assay_7	50927971	2-cell-E4-B1	chr9	2cell_B9	C	G	no gene	3601	46	6.29062	0	10.2419	23.0761	12.8342	0.000224016
assay_1	51055315	2-cell-E4-B2	chr3	2cell_B10	T	C	Ccrn4l	25	79	-1.65992	1.18928e-07	17.9004	17.4533	-0.447028	0.00230018
assay_2	143383670	2-cell-E4-B2	chr4	2cell_B10	A	T	Gm13023	27	149	-2.46428	3.71191e-20	17.4444	14.9969	-2.44745	1.97982e-05
assay_3	143400029	2-cell-E4-B2	chr4	2cell_B10	A	G	Gm13084	43	268	-2.63982	2.79247e-37	15.3756	14.8629	-0.512749	0.0752815
assay_4	143383681	2-cell-E4-B2	chr4	2cell_B10	C	T	Gm13023	22	152	-2.7885	6.50387e-23	16.7543	16.2805	-0.473791	0.113444
assay_5	78159952	2-cell-E4-B2	chr9	2cell_B10	A	G	Omt2a	246	144	0.77259	2.40476e-07	11.431	11.0859	-0.345111	0.349041
assay_6	65288811	2-cell-E4-B2	chr13	2cell_B10	A	G	Nlrp4f	252	63	2	1.76355e-26	14.3949	16.0036	1.60875	0.034769
assay_7	50927971	2-cell-E4-B2	chr9	2cell_B10	C	G	no gene	3676	58	5.98594	0	11.4135	24.2476	12.8341	1.39978e-05
assay_8	137198396	4-cell-E1-B1	chr1	4cell_B1	T	C	Timm17a	105	390	-1.89308	1.44511e-37	25.1331	19.1409	-5.99213	3.63522e-07
assay_9	173393882	4-cell-E1-B1	chr1	4cell_B1	T	C	F11r	99	146	-0.560468	0.00267579	ND	21.0128	ND	ND
assay_10	118301831	4-cell-E1-B1	chr2	4cell_B1	A	T	Srp14	27	263	-3.28403	1.13173e-43	27.3235	19.6769	-7.64655	2.98065e-06
assay_11	36464956	4-cell-E1-B1	chr3	4cell_B1	A	G	Ccna2	75	452	-2.59136	1.32279e-60	22.1463	19.9963	-2.15009	0.000769212
assay_12	117429538	4-cell-E1-B1	chr4	4cell_B1	C	T	Klf17	388	83	2.22487	7.31554e-45	19.2512	20.7524	1.50125	3.45525e-05
assay_13	31338840	4-cell-E1-B1	chr5	4cell_B1	G	A	Slc5a6	42	187	-2.15458	9.53038e-22	26.8812	20.8358	-6.04545	0.000163332
assay_14	31338942	4-cell-E1-B1	chr5	4cell_B1	G	T	Slc5a6	71	227	-1.6768	1.6127e-19	ND	23.3357	ND	ND
assay_15	82597860	4-cell-E1-B1	chr6	4cell_B1	C	G	Pole4	240	76	1.65896	2.8166e-20	19.9301	21.5833	1.65317	0.0131597
assay_16	96233485	4-cell-E1-B1	chr9	4cell_B1	T	C	Atp1b3	153	21	2.86507	1.42145e-23	22.0952	27.0867	4.99155	0.00132276
assay_17	46484390	4-cell-E1-B1	chr11	4cell_B1	C	T	Timd2	80	292	-1.8679	4.19015e-28	ND	22.3872	ND	ND
assay_18	6084660	4-cell-E1-B1	chr17	4cell_B1	G	A	Gtf2h5	64	148	-1.20945	7.96754e-09	ND	21.1711	ND	ND
assay_19	34792353	4-cell-E1-B1	chr18	4cell_B1	C	T	Kif20a,Cdc23	195	41	2.24978	1.18905e-23	21.7146	ND	ND	ND
assay_8	137198396	4-cell-E1-B2	chr1	4cell_B2	T	C	Timm17a	75	912	-3.60407	2.21536e-156	24.5713	18.8914	-5.67993	5.45764e-05
assay_9	173393882	4-cell-E1-B2	chr1	4cell_B2	T	C	F11r	65	321	-2.30406	8.2546e-39	ND	20.6982	ND	ND
assay_10	118301831	4-cell-E1-B2	chr2	4cell_B2	A	T	Srp14	42	468	-3.47805	2.27222e-79	27.0757	19.8111	-7.26467	0.000122769
assay_11	36464956	4-cell-E1-B2	chr3	4cell_B2	A	G	Ccna2	68	900	-3.72632	1.55075e-157	22.0537	19.9412	-2.1125	0.00212256
assay_12	117429538	4-cell-E1-B2	chr4	4cell_B2	C	T	Klf17	741	309	1.26187	1.51186e-40	19.3854	19.7467	0.361347	0.282527
assay_13	31338840	4-cell-E1-B2	chr5	4cell_B2	G	A	Slc5a6	31	348	-3.48875	1.29903e-59	26.8881	20.8723	-6.01578	4.6009e-05
assay_14	31338942	4-cell-E1-B2	chr5	4cell_B2	G	T	Slc5a6	70	416	-2.57116	1.63956e-55	ND	23.3618	ND	ND
assay_15	82597860	4-cell-E1-B2	chr6	4cell_B2	C	G	Pole4	500	158	1.662	1.49696e-40	19.9006	21.3835	1.48285	0.0522164
assay_16	96233485	4-cell-E1-B2	chr9	4cell_B2	T	C	Atp1b3	183	22	3.05627	2.45854e-29	22.8076	27.3521	4.54457	1.61456e-05
assay_17	46484390	4-cell-E1-B2	chr11	4cell_B2	C	T	Timd2	60	466	-2.9573	4.01519e-70	ND	22.6644	ND	ND
assay_18	6084660	4-cell-E1-B2	chr17	4cell_B2	G	A	Gtf2h5	63	404	-2.68093	4.29916e-56	ND	21.2003	ND	ND
assay_19	34792353	4-cell-E1-B2	chr18	4cell_B2	C	T	Kif20a,Cdc23	360	40	3.16993	1.27775e-57	21.0207	ND	ND	ND
assay_8	137198396	4-cell-E2-B1	chr1	4cell_B5	T	C	Timm17a	70	245	-1.80735	6.19673e-23	24.9081	18.8073	-6.10081	1.53859e-05
assay_9	173393882	4-cell-E2-B1	chr1	4cell_B5	T	C	F11r	57	134	-1.2332	2.5252e-08	27.4541	19.4527	ND	ND
assay_10	118301831	4-cell-E2-B1	chr2	4cell_B5	A	T	Srp14	34	68	-1	0.000761281	22.9875	21.825	-1.16254	0.0225155
assay_11	36464956	4-cell-E2-B1	chr3	4cell_B5	A	G	Ccna2	36	203	-2.49541	3.35571e-27	22.8171	20.5072	-2.30996	0.00811388
assay_12	117429538	4-cell-E2-B1	chr4	4cell_B5	C	T	Klf17	84	72	0.222392	0.336668	21.2309	19.332	-1.89887	0.00460615
assay_13	31338840	4-cell-E2-B1	chr5	4cell_B5	G	A	Slc5a6	22	77	-1.80735	3.24441e-08	27.9358	22.0034	ND	ND
assay_14	31338942	4-cell-E2-B1	chr5	4cell_B5	G	T	Slc5a6	35	90	-1.36257	8.68323e-07	ND	24.5704	ND	ND
assay_15	82597860	4-cell-E2-B1	chr6	4cell_B5	C	G	Pole4	124	25	2.31034	5.04551e-16	19.8417	ND	ND	ND
assay_16	96233485	4-cell-E2-B1	chr9	4cell_B5	T	C	Atp1b3	60	11	2.44746	6.05505e-09	23.3566	27.3461	3.98948	0.000349447
assay_17	46484390	4-cell-E2-B1	chr11	4cell_B5	C	T	Timd2	59	206	-1.80386	1.71455e-19	23.6886	23.3426	-0.346063	0.291479
assay_18	6084660	4-cell-E2-B1	chr17	4cell_B5	G	A	Gtf2h5	109	31	1.81399	4.33347e-11	21.0447	ND	ND	ND
assay_19	34792353	4-cell-E2-B1	chr18	4cell_B5	C	T	Kif20a,Cdc23	35	67	-0.936806	0.00153242	ND	25.2007	ND	ND
assay_8	137198396	4-cell-E2-B2	chr1	4cell_B6	T	C	Timm17a	127	709	-2.48096	4.12115e-90	25.0036	18.7187	-6.2849	5.60396e-05
assay_9	173393882	4-cell-E2-B2	chr1	4cell_B6	T	C	F11r	95	402	-2.0812	3.81791e-43	27.5769	19.9784	-7.59849	1.86202e-06
assay_10	118301831	4-cell-E2-B2	chr2	4cell_B6	A	T	Srp14	63	190	-1.59258	1.41183e-15	23.8691	21.6169	-2.25217	0.00174505
assay_11	36464956	4-cell-E2-B2	chr3	4cell_B6	A	G	Ccna2	85	842	-3.30829	1.86426e-136	22.1364	20.028	-2.10832	0.00046539
assay_12	117429538	4-cell-E2-B2	chr4	4cell_B6	C	T	Klf17	171	479	-1.48603	1.3349e-33	20.3409	18.3349	-2.00594	0.00192932
assay_13	31338840	4-cell-E2-B2	chr5	4cell_B6	G	A	Slc5a6	48	256	-2.41504	8.29531e-33	26.9955	20.8372	-6.15834	0.000103303
assay_14	31338942	4-cell-E2-B2	chr5	4cell_B6	G	T	Slc5a6	75	428	-2.51265	8.1092e-56	27.9941	23.5034	ND	ND
assay_15	82597860	4-cell-E2-B2	chr6	4cell_B6	C	G	Pole4	567	46	3.62364	2.65112e-98	19.0507	ND	ND	ND
assay_16	96233485	4-cell-E2-B2	chr9	4cell_B6	T	C	Atp1b3	316	36	3.13386	2.29886e-50	22.0392	26.9485	4.9093	0.000339952
assay_17	46484390	4-cell-E2-B2	chr11	4cell_B6	C	T	Timd2	240	513	-1.09592	2.55568e-23	23.7994	23.1127	-0.686737	0.0334169
assay_18	6084660	4-cell-E2-B2	chr17	4cell_B6	G	A	Gtf2h5	318	86	1.88662	8.06138e-31	20.3386	ND	ND	ND
assay_19	34792353	4-cell-E2-B2	chr18	4cell_B6	C	T	Kif20a,Cdc23	77	275	-1.8365	4.8973e-26	ND	23.9083	ND	ND
assay_8	137198396	4-cell-E3-B1	chr1	4cell_B9	T	C	Timm17a	89	241	-1.43716	5.89412e-17	24.93	18.8427	-6.08727	4.11594e-05
assay_9	173393882	4-cell-E3-B1	chr1	4cell_B9	T	C	F11r	59	104	-0.817797	0.000424007	ND	20.7442	ND	ND
assay_10	118301831	4-cell-E3-B1	chr2	4cell_B9	A	T	Srp14	52	82	-0.657112	0.00955293	21.9294	21.3591	-0.570331	0.0516475
assay_11	36464956	4-cell-E3-B1	chr3	4cell_B9	A	G	Ccna2	144	163	-0.178803	0.278193	21.7774	20.9548	-0.822586	0.00320153
assay_12	117429538	4-cell-E3-B1	chr4	4cell_B9	C	T	Klf17	222	48	2.20945	3.34071e-26	19.08	21.8496	2.7696	0.00364591
assay_13	31338840	4-cell-E3-B1	chr5	4cell_B9	G	A	Slc5a6	52	75	-0.528379	0.0412588	20.4131	21.7762	1.36305	0.00134657
assay_14	31338942	4-cell-E3-B1	chr5	4cell_B9	G	T	Slc5a6	78	97	-0.314511	0.150927	22.0027	24.8434	2.8407	0.00282088
assay_15	82597860	4-cell-E3-B1	chr6	4cell_B9	C	G	Pole4	37	60	-0.697437	0.019528	ND	21.2364	ND	ND
assay_16	96233485	4-cell-E3-B1	chr9	4cell_B9	T	C	Atp1b3	68	18	1.91754	6.98181e-08	22.427	24.3912	1.96425	0.00676389
assay_17	46484390	4-cell-E3-B1	chr11	4cell_B9	C	T	Timd2	121	231	-0.932886	4.54524e-09	23.5252	22.5616	-0.963644	0.00787335
assay_18	6084660	4-cell-E3-B1	chr17	4cell_B9	G	A	Gtf2h5	51	74	-0.537028	0.0396687	ND	21.4394	ND	ND
assay_19	34792353	4-cell-E3-B1	chr18	4cell_B9	C	T	Kif20a,Cdc23	133	40	1.73335	1.542e-12	21.1309	ND	ND	ND
assay_8	137198396	4-cell-E3-B2	chr1	4cell_B10	T	C	Timm17a	89	928	-3.38225	1.51985e-152	24.774	18.7428	-6.03117	3.35859e-05
assay_9	173393882	4-cell-E3-B2	chr1	4cell_B10	T	C	F11r	91	478	-2.39307	3.41875e-59	ND	19.8342	ND	ND
assay_10	118301831	4-cell-E3-B2	chr2	4cell_B10	A	T	Srp14	134	310	-1.21004	6.67819e-17	21.6411	20.7636	-0.877548	0.0106609
assay_11	36464956	4-cell-E3-B2	chr3	4cell_B10	A	G	Ccna2	515	363	0.504603	2.90125e-07	22.4117	21.3542	-1.05755	0.0191007
assay_12	117429538	4-cell-E3-B2	chr4	4cell_B10	C	T	Klf17	1385	71	4.28592	7.25676e-260	18.105	22.231	4.12595	4.22377e-05
assay_13	31338840	4-cell-E3-B2	chr5	4cell_B10	G	A	Slc5a6	247	284	-0.20138	0.108348	20.1039	20.9711	0.867177	0.0392194
assay_14	31338942	4-cell-E3-B2	chr5	4cell_B10	G	T	Slc5a6	396	277	0.515614	4.49418e-06	21.4927	23.9947	2.50204	0.00311476
assay_15	82597860	4-cell-E3-B2	chr6	4cell_B10	C	G	Pole4	60	320	-2.41504	1.39669e-40	ND	20.1034	ND	ND
assay_16	96233485	4-cell-E3-B2	chr9	4cell_B10	T	C	Atp1b3	330	25	3.72247	6.15687e-59	21.2349	25.1562	3.92124	0.000561132
assay_17	46484390	4-cell-E3-B2	chr11	4cell_B10	C	T	Timd2	365	520	-0.510615	1.88568e-07	22.9955	22.0645	-0.93107	0.0457259
assay_18	6084660	4-cell-E3-B2	chr17	4cell_B10	G	A	Gtf2h5	54	348	-2.68806	1.10614e-48	27.9166	20.9781	-6.93849	0.000428166
assay_19	34792353	4-cell-E3-B2	chr18	4cell_B10	C	T	Kif20a,Cdc23	350	41	3.09366	4.78211e-55	21.1615	ND	ND	ND
assay_20	173393882	8-cell-E1-B1	chr1	8cell_A1	T	C	F11r	618	82	2.91391	2.96539e-91	18.506	24.8348	6.32875	0.00113713
assay_21	117429538	8-cell-E1-B1	chr4	8cell_A1	C	T	Klf17	340	165	1.04307	6.84033e-15	19.2258	19.9137	0.68793	0.0266066
assay_22	142897304	8-cell-E1-B1	chr2	8cell_A1	A	G	Snrpb2	54	334	-2.62882	7.4114e-46	23.7133	19.1434	-4.56993	7.51713e-07
assay_23	130321697	8-cell-E1-B1	chr5	8cell_A1	G	A	Cct6a	377	47	3.00383	8.38337e-58	18.4373	ND	ND	ND
assay_24	64023990	8-cell-E1-B1	chr9	8cell_A1	C	T	Rpl4	65	452	-2.79781	5.81313e-65	ND	21.2769	ND	ND
assay_25	6328302	8-cell-E1-B1	chr11	8cell_A1	G	A	H2afv	24	239	-3.3159	4.08455e-40	26.7576	19.6003	-7.15731	0.000290003
assay_26	6328309	8-cell-E1-B1	chr11	8cell_A1	C	T	H2afv	24	241	-3.32793	1.54475e-40	26.1094	19.2624	-6.84705	4.31846e-05
assay_20	173393882	8-cell-E1-B2	chr1	8cell_A4	T	C	F11r	334	50	2.73985	1.34516e-47	19.1976	25.7045	6.5069	0.00078876
assay_21	117429538	8-cell-E1-B2	chr4	8cell_A4	C	T	Klf17	187	118	0.664251	7.78486e-05	19.6858	20.5658	0.880035	0.0179515
assay_22	142897304	8-cell-E1-B2	chr2	8cell_A4	A	G	Snrpb2	38	212	-2.47999	3.62616e-28	23.6484	18.8485	-4.79992	1.55171e-05
assay_23	130321697	8-cell-E1-B2	chr5	8cell_A4	G	A	Cct6a	235	51	2.20409	1.4333e-27	18.487	ND	ND	ND
assay_24	64023990	8-cell-E1-B2	chr9	8cell_A4	C	T	Rpl4	65	234	-1.848	1.46276e-22	ND	21.6836	ND	ND
assay_25	6328302	8-cell-E1-B2	chr11	8cell_A4	G	A	H2afv	21	241	-3.52057	4.48875e-42	27.1753	19.1815	-7.99382	4.27408e-05
assay_26	6328309	8-cell-E1-B2	chr11	8cell_A4	C	T	H2afv	26	233	-3.16375	7.33095e-38	26.3273	19.0175	-7.30979	0.00013234
assay_20	173393882	8-cell-E2-B1	chr1	8cell_A5	T	C	F11r	524	60	3.12653	3.66853e-82	18.8264	25.4455	6.61908	4.81396e-05
assay_21	117429538	8-cell-E2-B1	chr4	8cell_A5	C	T	Klf17	330	114	1.53343	1.17239e-24	19.0724	19.9971	0.92466	0.00412361
assay_22	142897304	8-cell-E2-B1	chr2	8cell_A5	A	G	Snrpb2	26	291	-3.48444	4.19434e-50	23.5227	18.9439	-4.57881	9.07736e-07
assay_23	130321697	8-cell-E2-B1	chr5	8cell_A5	G	A	Cct6a	374	38	3.29897	1.5098e-61	18.7361	ND	ND	ND
assay_24	64023990	8-cell-E2-B1	chr9	8cell_A5	C	T	Rpl4	48	488	-3.34577	1.54735e-80	ND	20.8823	ND	ND
assay_25	6328302	8-cell-E2-B1	chr11	8cell_A5	G	A	H2afv	14	318	-4.50553	1.70871e-62	26.3308	18.8445	-7.48628	6.0621e-05
assay_26	6328309	8-cell-E2-B1	chr11	8cell_A5	C	T	H2afv	14	324	-4.5325	8.5965e-64	25.8496	19.2702	-6.5794	0.000742044
assay_20	173393882	8-cell-E2-B2	chr1	8cell_A6	T	C	F11r	303	54	2.48829	1.16723e-39	19.1931	25.5458	6.35269	0.000454386
assay_21	117429538	8-cell-E2-B2	chr4	8cell_A6	C	T	Klf17	228	191	0.255461	0.0706737	19.4458	19.3414	-0.104372	0.546367
assay_22	142897304	8-cell-E2-B2	chr2	8cell_A6	A	G	Snrpb2	36	203	-2.49541	3.35571e-27	24.0467	19.3561	-4.69068	0.00230357
assay_23	130321697	8-cell-E2-B2	chr5	8cell_A6	G	A	Cct6a	302	33	3.19401	6.73395e-49	18.6066	ND	ND	ND
assay_24	64023990	8-cell-E2-B2	chr9	8cell_A6	C	T	Rpl4	66	377	-2.51403	2.09055e-49	ND	21.1563	ND	ND
assay_25	6328302	8-cell-E2-B2	chr11	8cell_A6	G	A	H2afv	17	170	-3.32193	4.64387e-29	26.8758	19.6723	-7.20349	0.000129933
assay_26	6328309	8-cell-E2-B2	chr11	8cell_A6	C	T	H2afv	18	184	-3.35364	1.61829e-31	25.3245	19.482	-5.84252	0.000804441
assay_20	173393882	8-cell-E3-B1	chr1	8cell_A9	T	C	F11r	260	341	-0.39126	0.000952958	19.8428	19.4512	-0.391602	0.271968
assay_21	117429538	8-cell-E3-B1	chr4	8cell_A9	C	T	Klf17	672	40	4.07039	5.12307e-124	17.9641	25.716	7.75192	0.000229346
assay_22	142897304	8-cell-E3-B1	chr2	8cell_A9	A	G	Snrpb2	90	165	-0.874469	2.64421e-06	20.9316	19.7435	-1.18807	0.0280914
assay_23	130321697	8-cell-E3-B1	chr5	8cell_A9	G	A	Cct6a	54	445	-3.04277	1.34579e-68	25.1227	21.3637	-3.759	0.00026775
assay_24	64023990	8-cell-E3-B1	chr9	8cell_A9	C	T	Rpl4	73	414	-2.50366	7.29287e-54	ND	21.2308	ND	ND
assay_25	6328302	8-cell-E3-B1	chr11	8cell_A9	G	A	H2afv	195	49	1.99262	9.04316e-21	19.2074	21.9558	2.74842	0.00517774
assay_26	6328309	8-cell-E3-B1	chr11	8cell_A9	C	T	H2afv	194	56	1.79256	2.59476e-18	18.9042	27.3116	8.40743	0.000151578
assay_20	173393882	8-cell-E3-B2	chr1	8cell_A15	T	C	F11r	346	310	0.158504	0.159854	19.0991	18.949	-0.150095	0.425849
assay_21	117429538	8-cell-E3-B2	chr4	8cell_A15	C	T	Klf17	377	30	3.65153	2.64839e-66	18.5836	26.1352	7.55156	0.000313024
assay_22	142897304	8-cell-E3-B2	chr2	8cell_A15	A	G	Snrpb2	122	244	-1	1.80541e-10	20.2907	18.8215	-1.46926	0.0101339
assay_23	130321697	8-cell-E3-B2	chr5	8cell_A15	G	A	Cct6a	105	603	-2.52177	3.6677e-78	24.2759	20.6444	-3.63147	0.000909041
assay_24	64023990	8-cell-E3-B2	chr9	8cell_A15	C	T	Rpl4	67	284	-2.08366	5.04892e-31	ND	21.0175	ND	ND
assay_25	6328302	8-cell-E3-B2	chr11	8cell_A15	G	A	H2afv	121	67	0.852774	8.20422e-05	19.1638	22.0293	2.86543	8.30495e-05
assay_26	6328309	8-cell-E3-B2	chr11	8cell_A15	C	T	H2afv	130	68	0.934905	1.05225e-05	18.8202	27.1941	8.37397	0.0011024

## Sheet: assays design
assay ID	Chromosome	cell-type	gene	start coordinate	end coordinate	strand	FP_first allele	FP_second allele	RP	Amp-Seq
assay_1	chr3	2cell	Ccrn4l	51055214	51055414	+	GCTGAGACAAGAAAGCT	GCTGAGACAAGAAAGCC	CCAGTCATCTGGCTTTTTCAAGAA	GCGCTGAGACAAGAAAGC[T/C]CACGTCTTGGAGGCCAGCTTGGGCTATATGTCAAGACCCTTTCTTGAAAAAGCCAGATGACTGG
assay_2	chr4	2cell	Gm13023	143383569	143383769	+	CAGCAGAGAACAGATTCTATTA	CAGCAGAGAACAGATTCTATTT	GATTTCTATCACTGAGGCTTTGGT	GGCAGCAGAGAACAGATTCTATT[A/T]ATTTATTCTGNAGAAAGCTAGTAATTGAAGGCTTAACCAAAGCCTCAGTGATAGAAATC
assay_3	chr4	2cell	Gm13084	143399928	143400128	-	CTCAGAGCTGGTAAANAGTATT	CTCAGAGCTGGTAAANAGTATC	GCCTGTATTGTAACACACACAAACTA	CGGCTCAGAGCTGGTAAANAGTAT[T/C]GCATCTANAAAAGATGTTAAGCACTATTTTATTCTCTAGGATTATTGTAGTTTGTGTGTGTTACAATACAGGC
assay_4	chr4	2cell	Gm13023	143383580	143383780	+	AGAACAGATTCTATTNATTTATTCTGC	AGAACAGATTCTATTNATTTATTCTGT	GATTTCTATCACTGAGGCTTTGGT	GCCAGAACAGATTCTATTNATTTATTCTG[C/T]AGAAAGCTAGTAATTGAAGGCTTAACCAAAGCCTCAGTGATAGAAATC
assay_5	chr9	2cell	Omt2a	78159851	78160051	-	GACCATGATGCCAAGT	GACCATGATGCCAAGC	AGTATAGTTAAGAACACTGGTAAAACCC	GGGACCATGATGCCAAG[T/C]TCCAGATCTTNTTGTGCCAGGACAGGTGGGGAGGGGGGTTTTACCAGTGTTCTTAACTATACT
assay_6	chr13	2cell	Nlrp4f	65288710	65288910	-	GGCATCCAACAATTTGAAT	GGCATCCAACAATTTGAAC	CTCCAGAGTACAGTGTGGGT	AGGGGCATCCAACAATTTGAA[T/C]CAAGGAATATCCTCACTGTGCAAGGCTTTGTGCCACCCACACTGTACTCTGGAG
assay_7	chr9	2cell	no gene	50927870	50928070	-	CAAGTACCACTTTTATAAAATAGATG	CAAGTACCACTTTTATAAAATAGATC	AATTTAAAGATAAATCCCTTTTTATGTCTTTTTAAAAGTT	ACCCCAAGTACCACTTTTATAAAATAGAT[G/C]ATATCAGTAAATCTANTCACTTTCAGTTGTAAATCAAACTTTTAAAAAGACATAAAAAGGGATTTATCTTTAAATT
assay_8	chr1	4cell	Timm17a	137198295	137198495	-	CCTTAGGTGGGACATCA	CCTTAGGTGGGACATCG	TTTTCACCCTCTGAGTCTCTTTTAAAT	CCCCTTAGGTGGGACATC[A/G]GCGGCCAAGCGGGCCATAAAGAGACATTTAGCACATTTTTCTATTTAAAAGAGACTCAGAGGGTGAAAA
assay_9	chr2	4cell	Srp14	118301730	118301930	-	GACTGGGATGGGCT	GACTGGGATGGGCA	CTGGAATCTAAGAATATCCAGCCAC	CCGACTGGGATGGGC[T/A]TGGGCTAGTTGTGGTAAGACGCCAGTTTTTGATTTGTGCTGTGTGGCTGGATATTCTTAGATTCCAG
assay_10	chr3	4cell	Ccna2	36464855	36465055	-	TGTCTATTTGGATAATTTTAATTGGT	TGTCTATTTGGATAATTTTAATTGGC	GACTTGCAAAGATTTCCAAATCAGT	CGCTGTCTATTTGGATAATTTTAATTGG[T/C]TAACATTGGTGCTGCCAACTGTCAAGATATTGAGAATAAACTGATTTGGAAATCTTTGCAAGTC
assay_11	chr9	4cell	Atp1b3	96233384	96233584	-	GTGAGGAGGGAAAAGGA	GTGAGGAGGGAAAAGGG	ACGGACAGGCACCACT	CGGTGAGGAGGGAAAAGG[A/G]AAATAAAGTGGATCTGAAAGTAGACTCTGCTTCTGCGCATGTGTGAGTGGTGCCTGTCCGT
assay_12	chr11	4cell	Timd2	46484289	46484489	-	CCTAGTGGCCCTCTG	CCTAGTGGCCCTCTA	CAACACAGAAAATTGCTCTGGAC	GCCTAGTGGCCCTCT[G/A]AGGCACCTTCTGCCTGAGATTAAAGAGACTGTCAGTGATATCACANCGTCCAGAGCAATTTTCTGTGTTG
assay_13	chr17	4cell	Gtf2h5	6084559	6084759	+	GAAGTGAGAGCGCTG	GAAGTGAGAGCGCTA	AGTGTCTGTGGCTGGGA	GCGAAGTGAGAGCGCT[G/A]GTGTTGAGCACTTGGGAATCCCAGCCACAGACACT
assay_14	chr18	4cell	Kif20a,Cdc23	34792252	34792452	-	TGAATACAGTTCTGGGTG	TGAATACAGTTCTGGGTA	CCCTGAGGTTGGTCAGC	GGGTGAATACAGTTCTGGGT[G/A]TATGCTGAAGCTTAAAAGAGACTTATCAGCTAAGCAGCTGACCAACCTCAGGG
assay_15	chr1	4cell	F11r	173393781	173393981	+	CTGGAACTACCGCAT	CTGGAACTACCGCAC	CCACCAAAGAGCCAAGACT	CCCTGGAACTACCGCA[T/C]GGACCCTTTGAAGATATGTGTGGATGGAGAAGATACGAGCTTTATAGTCTTGGCTCTTTGGTGG
assay_16	chr4	4cell	Klf17	117429437	117429637	-	AGATNAACGGTGACCAGAG	AGATNAACGGTGACCAGAA	CTAGTTCACAGCATTTTCTAACAGC	CCAGATNAACGGTGACCAGA[G/A]CTGATCCCTGCCTGTAGAAGTCAGAGCTACTGAAAGAGCTGTTAGAAAATGCTGTGAACTAG
assay_17	chr5	4cell	Slc5a6	31338739	31338939	-	AACAGCATTTCTTACAACC	AACAGCATTTCTTACAACT	GACATGATAGTGAAGGAATCACCA	CCCAACAGCATTTCTTACAAC[C/T]GCCCCAGGACCTGATTTGGCAAGACTGACTAGCTCTCTTTAGCCCTNTGGTGATTCCTTCACTATCATGTC
assay_18	chr5	4cell	Slc5a6	31338841	31339041	-	TTTGCAGGGTATAGAATCC	TTTGCAGGGTATAGAATCA	AATGCCACCCTTTTCTTAGTGT	GCCTTTGCAGGGTATAGAATC[C/A]CATCACNCGTGGGAAAATAAATGAATACACTAAGAAAAGGGTGGCATT
assay_19	chr6	4cell	Pole4	82597759	82597959	-	ATAACGTTCTCCACCAAG	ATAACGTTCTCCACCAAC	CTGCCCCAAACAGCATCA	GCCATAACGTTCTCCACCAA[G/C]TCTTCCATTACTTGAGTCTGTCTTCCAATTCAAGCCTGGATGTAGCTGATGCTGTTTGGGGCAG
assay_20	chr1	8cell	F11r	173393781	173393981	+	CTGGAACTACCGCAT	CTGGAACTACCGCAC	CCACCAAAGAGCCAAGACT	CCCTGGAACTACCGCA[T/C]GGACCCTTTGAAGATATGTGTGGATGGAGAAGATACGAGCTTTATAGTCTTGGCTCTTTGGTGG
assay_21	chr4	8cell	Klf17	117429437	117429637	-	AGATNAACGGTGACCAGAG	AGATNAACGGTGACCAGAA	CTAGTTCACAGCATTTTCTAACAGC	CCAGATNAACGGTGACCAGA[G/A]CTGATCCCTGCCTGTAGAAGTCAGAGCTACTGAAAGAGCTGTTAGAAAATGCTGTGAACTAG
assay_22	chr2	8cell	Snrpb2	142897203	142897403	+	AAGAAGTAACATGNGATGCCAA	AAGAAGTAACATGNGATGCCAG	CAACCATTTAAAATGACTTGACCGA	CGGAAGAAGTAACATGNGATGCCA[A/G]TNTGGAAGGACTTGGTTATTTATAGTGTTTGTTTTGATCATATTCGGTCAAGTCATTTTAAATGGTTG
assay_23	chr5	8cell	Cct6a	130321596	130321796	+	CTCTCTGAAGGGTTGAG	CTCTCTGAAGGGTTGAA	TCCAAATCACTTGAAGCTTGGA	GGCTCTCTGAAGGGTTGA[G/A]GCCTGCCTGTGATACTACAGGATGTTGGGGGGAATGGTTATTTTTGTCCAAGCTTCAAGTGATTTGGA
assay_24	chr9	8cell	Rpl4	64023889	64024089	+	GCTGTTCAGCTGCTC	GCTGTTCAGCTGCTT	GGTGAGCTTACCTTTTTGATGTC	CCGCTGTTCAGCTGCT[C/T]AAGAAACTCAAAGCTTGGAATGACATCAAAAAGGTAAGCTCACC
assay_25	chr11	8cell	H2afv	6328201	6328401	-	CGGTGTGCNGAAGAGC	CGGTGTGCNGAAGAGT	CGAGTCTAAAAACATACAGATGTGG	GCCGGTGTGCNGAAGAG[C/T]ATAGACGGTTGCTGTAGACGAGACAAAGGCCACATCTGTATGTTTTTAGACTCG
assay_26	chr11	8cell	H2afv	6328208	6328408	-	GTGCGGTGTGCG	GTGCGGTGTGCA	GTCTAAAAACATACAGATGTGGCCT	CGTGCGGTGTGC[G/A]GAAGAGNATAGACGGTTGCTGTAGACGAGACAAAGGCCACATCTGTATGTTTTTAGAC
